# Supplementary material for: Thermochemistry and crystal structure predictions of energetic derivatives of formamidine salts
Source: Royal Society of Chemistry journal article supplement (doi:10.1039/d2nj06270d), 2023-01-01
Supplement: d2nj06270d1.pdf [file d2nj06270d1.pdf]

## Thermochemistry and Crystal Structure Predictions of Energetic Derivatives of Formamidinium Salts

Dmitry V. Khakimov and Tatyana S. Pivina

N. D. Zelinsky Institute of Organic Chemistry, Russian Academy of Sciences,

119991 Moscow, Russian Federation.

7933765@mail.ru

### Contents:

- S1.** The structures of ionic and neutral parts for calculations.
- S2.** Lattice energy minimization.
- Table **S3.** Literature values for atomic  $H^\circ$  and  $\Delta H_f^\circ$  ( $\text{kcal mol}^{-1}$ ).
- Table **S4.** Fitting coefficients for VBT method for salts  $MpXq$  ( $q:p$ ).
- Table **S5.** Atom-atom potentials LJ 6-12.
- S6.** Optimized crystal structure coordinates for formamidinium nitrate (ionic form).
- S7.** Optimized crystal structure coordinates for azidoformamidinium nitrate (ionic form).
- S8.** Optimized crystal structure coordinates for guanidinium nitrate (ionic form).
- S9.** Optimized crystal structure coordinates for nitroformamidinium nitrate (ionic form).
- S10.** Optimized crystal structure coordinates for formamidine – nitric acid (cocrystal form).
- S11.** Optimized crystal structure coordinates for azidoformamidine – nitric acid (cocrystal form).
- S12.** Optimized crystal structure coordinates for guanidine – nitric acid (cocrystal form).
- S13.** Optimized crystal structure coordinates for nitroformamidine – nitric acid (cocrystal form).
- S14.** Optimized crystal structure coordinates for formamidinium dinitramide (ionic form).
- S15.** Optimized crystal structure coordinates for azidoformamidinium dinitramide (ionic form).
- S16.** Optimized crystal structure coordinates for guanidinium dinitramide (ionic form).
- S17.** Optimized crystal structure coordinates for nitroformamidinium dinitramide (ionic form).
- S18.** Optimized crystal structure coordinates for formamidine – dinitramic acid (cocrystal form).
- S19.** Optimized crystal structure coordinates for azidoformamidine – dinitramic acid (cocrystal form).
- S20.** Optimized crystal structure coordinates for guanidine – dinitramic acid (cocrystal form).
- S21.** Optimized crystal structure coordinates for nitroformamidine – dinitramic acid (cocrystal form).

S1. The structures of ionic and neutral parts for calculations.

Nitrate anion

Standard orientation:

| Center Number | Atomic Number | Atomic Type | Coordinates (Angstroms) |           |          |
|---------------|---------------|-------------|-------------------------|-----------|----------|
|               |               |             | X                       | Y         | Z        |
| 1             | 7             | 0           | 0.000000                | 0.000000  | 0.000000 |
| 2             | 8             | 0           | 0.000000                | 1.262676  | 0.000000 |
| 3             | 8             | 0           | 1.093509                | -0.631338 | 0.000000 |
| 4             | 8             | 0           | -1.093509               | -0.631338 | 0.000000 |

Nitric acid

Standard orientation:

| Center Number | Atomic Number | Atomic Type | Coordinates (Angstroms) |           |          |
|---------------|---------------|-------------|-------------------------|-----------|----------|
|               |               |             | X                       | Y         | Z        |
| 1             | 7             | 0           | 0.000000                | 0.153278  | 0.000000 |
| 2             | 8             | 0           | -0.988520               | 0.833436  | 0.000000 |
| 3             | 8             | 0           | 1.172698                | 0.469945  | 0.000000 |
| 4             | 8             | 0           | -0.262521               | -1.233511 | 0.000000 |
| 5             | 1             | 0           | 0.626743                | -1.631907 | 0.000000 |

Dinitramide anion

Standard orientation:

| Center Number | Atomic Number | Atomic Type | Coordinates (Angstroms) |           |           |
|---------------|---------------|-------------|-------------------------|-----------|-----------|
|               |               |             | X                       | Y         | Z         |
| 1             | 7             | 0           | 0.000000                | 0.000000  | 0.800391  |
| 2             | 7             | 0           | 0.000000                | 1.158837  | 0.056489  |
| 3             | 8             | 0           | -0.481988               | 1.236388  | -1.080810 |
| 4             | 8             | 0           | 0.421228                | 2.150544  | 0.681211  |
| 5             | 7             | 0           | 0.000000                | -1.158837 | 0.056489  |
| 6             | 8             | 0           | 0.481988                | -1.236388 | -1.080810 |
| 7             | 8             | 0           | -0.421228               | -2.150544 | 0.681211  |

Dinitramic acid

Standard orientation:

| Center Number | Atomic Number | Atomic Type | Coordinates (Angstroms) |   |   |
|---------------|---------------|-------------|-------------------------|---|---|
|               |               |             | X                       | Y | Z |

|   |   |   |           |           |           |
|---|---|---|-----------|-----------|-----------|
| 1 | 7 | 0 | -0.604522 | -0.450746 | 0.000000  |
| 2 | 7 | 0 | -0.016175 | 0.005130  | 1.253173  |
| 3 | 8 | 0 | 0.330495  | 1.154191  | 1.343066  |
| 4 | 8 | 0 | -0.016175 | -0.869483 | 2.102427  |
| 5 | 7 | 0 | -0.016175 | 0.005130  | -1.253173 |
| 6 | 8 | 0 | 0.330495  | 1.154191  | -1.343066 |
| 7 | 8 | 0 | -0.016175 | -0.869483 | -2.102427 |
| 8 | 1 | 0 | -0.571005 | -1.471919 | 0.000000  |

### Formamidinium

Standard orientation:

| Center Number | Atomic Number | Atomic Type | Coordinates (Angstroms) |           |           |
|---------------|---------------|-------------|-------------------------|-----------|-----------|
|               |               |             | X                       | Y         | Z         |
| 1             | 6             | 0           | 0.000000                | 0.000000  | 0.431146  |
| 2             | 7             | 0           | 0.000000                | 1.166204  | -0.176628 |
| 3             | 1             | 0           | 0.000000                | 2.019680  | 0.369738  |
| 4             | 1             | 0           | 0.000000                | 1.259574  | -1.187843 |
| 5             | 7             | 0           | 0.000000                | -1.166204 | -0.176628 |
| 6             | 1             | 0           | 0.000000                | -2.019680 | 0.369738  |
| 7             | 1             | 0           | 0.000000                | -1.259574 | -1.187843 |
| 8             | 1             | 0           | 0.000000                | 0.000000  | 1.522120  |

### Formamidine

Standard orientation:

| Center Number | Atomic Number | Atomic Type | Coordinates (Angstroms) |           |           |
|---------------|---------------|-------------|-------------------------|-----------|-----------|
|               |               |             | X                       | Y         | Z         |
| 1             | 6             | 0           | -0.122435               | 0.393479  | -0.000665 |
| 2             | 7             | 0           | 1.136898                | -0.149274 | -0.052296 |
| 3             | 1             | 0           | 1.928457                | 0.419474  | 0.205718  |
| 4             | 1             | 0           | 1.215993                | -1.148178 | 0.091888  |
| 5             | 7             | 0           | -1.176983               | -0.333503 | 0.010956  |
| 6             | 1             | 0           | -2.011098               | 0.251991  | 0.001580  |
| 7             | 1             | 0           | -0.118144               | 1.495281  | -0.005810 |

### Azidoformamidinium

Standard orientation:

| Center Number | Atomic Number | Atomic Type | Coordinates (Angstroms) |          |          |
|---------------|---------------|-------------|-------------------------|----------|----------|
|               |               |             | X                       | Y        | Z        |
| 1             | 6             | 0           | 0.000000                | 0.796514 | 0.000000 |

|    |   |   |           |           |          |
|----|---|---|-----------|-----------|----------|
| 2  | 7 | 0 | 1.333003  | 0.759724  | 0.000000 |
| 3  | 1 | 0 | 1.844854  | -0.113091 | 0.000000 |
| 4  | 1 | 0 | 1.880363  | 1.611806  | 0.000000 |
| 5  | 7 | 0 | -0.665918 | 1.945287  | 0.000000 |
| 6  | 1 | 0 | -1.679492 | 1.932800  | 0.000000 |
| 7  | 1 | 0 | -0.193967 | 2.840170  | 0.000000 |
| 8  | 7 | 0 | -0.801495 | -0.316891 | 0.000000 |
| 9  | 7 | 0 | -0.234084 | -1.446143 | 0.000000 |
| 10 | 7 | 0 | 0.103957  | -2.520658 | 0.000000 |

Azidoformamidine

Standard orientation:

| Center<br>Number | Atomic<br>Number | Atomic<br>Type | Coordinates (Angstroms) |           |           |
|------------------|------------------|----------------|-------------------------|-----------|-----------|
|                  |                  |                | X                       | Y         | Z         |
| 1                | 6                | 0              | 0.803691                | 0.118371  | -0.002230 |
| 2                | 7                | 0              | 0.615983                | 1.384486  | 0.007064  |
| 3                | 1                | 0              | 1.497166                | 1.898022  | -0.001505 |
| 4                | 7                | 0              | 1.986743                | -0.587312 | -0.059398 |
| 5                | 7                | 0              | -0.291887               | -0.795183 | 0.002516  |
| 6                | 7                | 0              | -1.414234               | -0.253468 | 0.000710  |
| 7                | 7                | 0              | -2.484407               | 0.115862  | 0.001098  |
| 8                | 1                | 0              | 2.832773                | -0.089207 | 0.173631  |
| 9                | 1                | 0              | 1.962532                | -1.569733 | 0.177327  |

Guanidinium

Standard orientation:

| Center<br>Number | Atomic<br>Number | Atomic<br>Type | Coordinates (Angstroms) |           |          |
|------------------|------------------|----------------|-------------------------|-----------|----------|
|                  |                  |                | X                       | Y         | Z        |
| 1                | 6                | 0              | 0.000000                | 0.000000  | 0.000000 |
| 2                | 7                | 0              | 0.000000                | 1.337339  | 0.000000 |
| 3                | 1                | 0              | 0.863621                | 1.862160  | 0.000000 |
| 4                | 1                | 0              | -0.863621               | 1.862160  | 0.000000 |
| 5                | 7                | 0              | 1.158170                | -0.668670 | 0.000000 |
| 6                | 1                | 0              | 1.180867                | -1.678998 | 0.000000 |
| 7                | 1                | 0              | 2.044488                | -0.183162 | 0.000000 |
| 8                | 7                | 0              | -1.158170               | -0.668670 | 0.000000 |
| 9                | 1                | 0              | -2.044488               | -0.183162 | 0.000000 |
| 10               | 1                | 0              | -1.180867               | -1.678998 | 0.000000 |

Guanidine

Standard orientation:

| Center<br>Number | Atomic<br>Number | Atomic<br>Type | Coordinates (Angstroms) |           |           |
|------------------|------------------|----------------|-------------------------|-----------|-----------|
|                  |                  |                | X                       | Y         | Z         |
| 1                | 6                | 0              | -0.019120               | 0.121110  | 0.000133  |
| 2                | 7                | 0              | -0.249331               | 1.384940  | 0.009745  |
| 3                | 1                | 0              | -1.249227               | 1.580829  | -0.045764 |
| 4                | 7                | 0              | 1.288485                | -0.355572 | -0.081501 |
| 5                | 1                | 0              | 1.487459                | -1.161726 | 0.499901  |
| 6                | 1                | 0              | 1.971160                | 0.386062  | 0.020746  |
| 7                | 7                | 0              | -0.959340               | -0.912031 | 0.076164  |
| 8                | 1                | 0              | -1.918586               | -0.613466 | -0.042023 |
| 9                | 1                | 0              | -0.734782               | -1.739720 | -0.464516 |

### Nitroformamidinium

Standard orientation:

| Center<br>Number | Atomic<br>Number | Atomic<br>Type | Coordinates (Angstroms) |           |           |
|------------------|------------------|----------------|-------------------------|-----------|-----------|
|                  |                  |                | X                       | Y         | Z         |
| 1                | 6                | 0              | 0.000000                | 0.000000  | -0.699560 |
| 2                | 7                | 0              | 0.000000                | 1.181150  | -1.252934 |
| 3                | 1                | 0              | 0.000000                | 1.996012  | -0.638406 |
| 4                | 1                | 0              | 0.000000                | 1.315732  | -2.259871 |
| 5                | 7                | 0              | 0.000000                | -1.181150 | -1.252934 |
| 6                | 1                | 0              | 0.000000                | -1.315732 | -2.259871 |
| 7                | 1                | 0              | 0.000000                | -1.996012 | -0.638406 |
| 8                | 7                | 0              | 0.000000                | 0.000000  | 0.836618  |
| 9                | 8                | 0              | 0.000000                | -1.096963 | 1.354917  |
| 10               | 8                | 0              | 0.000000                | 1.096963  | 1.354917  |

### Nitroformamidine

Standard orientation:

| Center<br>Number | Atomic<br>Number | Atomic<br>Type | Coordinates (Angstroms) |           |          |
|------------------|------------------|----------------|-------------------------|-----------|----------|
|                  |                  |                | X                       | Y         | Z        |
| 1                | 6                | 0              | 0.000000                | 0.774340  | 0.000000 |
| 2                | 7                | 0              | -1.023903               | 1.512048  | 0.000000 |
| 3                | 7                | 0              | 1.297598                | 1.149538  | 0.000000 |
| 4                | 1                | 0              | 1.510979                | 2.134850  | 0.000000 |
| 5                | 1                | 0              | 2.028290                | 0.454743  | 0.000000 |
| 6                | 7                | 0              | -0.123659               | -0.780798 | 0.000000 |
| 7                | 8                | 0              | 0.914480                | -1.433053 | 0.000000 |
| 8                | 8                | 0              | -1.252973               | -1.236933 | 0.000000 |
| 9                | 1                | 0              | -1.881580               | 0.958743  | 0.000000 |

## S2. Lattice energy minimization.

The optimal geometry and distributions of electrostatic potentials of the molecules and ions were calculated on the program package Gaussian 09 using DFT method with B3LYP functional and the extended basis aug-cc-PVDZ. Grimme dispersion correction (version 2) was used (GD2). The optimized molecular structures were treated as rigid bodies throughout the lattice energy calculations in this study.

The current version of program PMC was used throughout the crystal packing calculations. In calculation of lattice energy the convergence acceleration was applied for both the r-1 electrostatic and r- 6 dispersion terms in the lattice sums with the convergence Kconv of 0.175 and the cutoff parameters Rcut=9 Å and R\*=0.5 Å for direct and reciprocal spaces, respectively. During minimization, the parameters of the unit cell and six parameters of rigid body of the crystallographically independent molecules were varied simultaneously, including three components of the center of mass and three Euler angles, while all the other molecules in the crystal environment perform the dependent motion in accordance with the symmetry group of a crystal. The local energy minimization was performed with the quasi Newton method using the Fortran subroutine VA09 Å with analytical first derivatives. Each local minimum was refined in a series of few minimization stages: at each stage (p), lists of pairs of atoms {i, j} and points of the reciprocal space {h, k, l} contributing to the approximate energy function of the lattice F(p) are not updated to ensure continuity and perfect integrity F(p) with smooth motion from the initial X0(p) to the lower point of Xmin(p); at which these lists are updated and the next minimization stage, p+1, is carried out starting from X0(p+1)=Xmin(p) down to a new minimum approximation Xmin (p+1), and etc., until the self-consistency condition Xmin (s)=Xmin (s- 1) is finally reached.

The enthalpies (H) and free energies (G) were calculated using the complete basis set (CBS) method of Petersson and coworkers in order to obtain very accurate energies. The CBS models use the known asymptotic convergence of pair natural orbital expressions to extrapolate from calculations using a finite basis set to the estimated complete basis set limit. CBS-4 begins with a HF/3-21G(d) geometry optimization; the zero point energy is computed at the same level. It then uses a large basis set SCF calculation as a base energy, and a MP2/6-31+G calculation with a CBS extrapolation to correct the energy through second order. A MP4(SDQ)/6-31+(d,p) calculation is used to approximate higher order contributions. In this study we applied the modified CBS-4M method (M referring to the use of Minimal Population localization) which is a re-parametrized version of the original CBS-4 method and also includes some additional empirical corrections. In addition, we applied G3B3 methods.

The enthalpies of the gas-phase species M were computed according to the atomization energy method:

$$\Delta H_f^\circ(\text{g, M, 298}) = H(\text{Molecule, 298}) - \Sigma H^\circ(\text{Atoms, 298}) + \Sigma \Delta H_f^\circ(\text{Atoms, 298})$$

Table S3. Literature values for atomic  $H^\circ$  and  $\Delta H_f^\circ$  (kcal mol<sup>-1</sup>).

|   | $H^\circ(\text{Atoms, 298})$ | $\Delta H_f^\circ(\text{Atoms, 298})$<br>CBS-4M | $\Delta H_f^\circ(\text{Atoms, 298})$<br>G3B3 |
|---|------------------------------|-------------------------------------------------|-----------------------------------------------|
| H | 52.1                         | -0.50099                                        | -0.49872823                                   |
| C | 171.3                        | -37.7862                                        | -37.8259642                                   |
| N | 113                          | -54.5225                                        | -54.56280323                                  |
| O | 59.6                         | -74.9912                                        | -75.02973288                                  |

Table S4. Fitting coefficients for VBT method for salts  $M_pX_q$  (q:p).

| Anion:Cation | $\alpha$ , kcal mol <sup>-1</sup> nm <sup>-1</sup> | $\beta$ , kcal mol <sup>-1</sup> |
|--------------|----------------------------------------------------|----------------------------------|
| <b>1:1</b>   | 117.3                                              | 51.9                             |
| <b>2:1</b>   | 133.5                                              | 60.9                             |
| <b>1:2</b>   | 165.3                                              | -29.8                            |
| <b>2:2</b>   | 101.6                                              | 91.5                             |

Table S5. Atom-atom potentials LJ 6-12.

| Atom 1 | Atom 2 | r, Å  | E, kcal mol <sup>-1</sup> |
|--------|--------|-------|---------------------------|
| H      | H      | 2.930 | -0.0359                   |
| H      | C      | 3.315 | -0.0474                   |
| H      | N      | 3.460 | -0.0357                   |
| H      | O      | 3.025 | -0.0795                   |
| H      | N'     | 3.460 | -0.0357                   |
| H      | H*     | 2.805 | -0.0467                   |
| C      | C      | 3.700 | -0.0722                   |
| C      | N      | 3.845 | -0.0567                   |
| C      | O      | 3.410 | -0.1170                   |
| C      | N'     | 3.845 | -0.0567                   |
| C      | H*     | 3.190 | -0.0597                   |
| N      | N      | 3.990 | -0.0450                   |
| N      | O      | 3.555 | -0.0906                   |
| N      | N'     | 3.990 | -0.0450                   |
| N      | H*     | 3.335 | -0.0445                   |
| O      | O      | 3.120 | -0.2001                   |
| O      | N'     | 3.555 | -0.0906                   |
| O      | H*     | 1.900 | -1.1100                   |
| N'     | N'     | 3.990 | -0.0450                   |
| N'     | H*     | 1.960 | -0.9000                   |
| H*     | H*     | 2.680 | -0.0614                   |

N' - N(sp<sup>2</sup>); H\* - H which form hydrogen-bonds.

S6. Optimized crystal structure coordinates for formamidinium nitrate (ionic form).

```
data_HF_NO3_1
_chemical_name_systematic
;RAS NNO22_C2_PVDZ

E(total)=-1.72053E+02 E(coul)=-1.60016E+02 E(vdW)=-1.20365E+01 Density= 1.78340
;
_cell_length_a 4.937
_cell_length_b 9.395
_cell_length_c 7.241
_cell_angle_alpha 97.37
_cell_angle_beta 106.79
_cell_angle_gamma 38.93
_cell_formula_units_Z 2
_symmetry_space_group_name_H-M 'P -1 '
_symmetry_Int_Tables_number 2
loop_
_symmetry_equiv_pos_as_xyz
1 x,y,z
2 -x,-y,-z
loop_
_atom_site_label
_atom_site_fract_x
_atom_site_fract_y
_atom_site_fract_z
C1 -0.05680 0.71206 0.68877 # 1
N2 -0.05176 0.85111 0.71922 # 2
H*3 -0.00856 0.89121 0.61669 # 3
H*4 -0.08974 0.92213 0.84288 # 4
N5 -0.11030 0.64864 0.81139 # 5
H*6 -0.10994 0.54055 0.77631 # 6
H*7 -0.15297 0.70345 0.94243 # 7
H8 -0.01329 0.64419 0.55138 # 8
#XC1 -0.05779 0.71362 0.69191 # 9
#XN2 -0.04872 0.85119 0.71113 # 10
#XH*3 0.00285 0.90760 0.59145 # 11
#XH*4 -0.09499 0.93618 0.86130 # 12
#XN5 -0.10918 0.64206 0.80632 # 13
#XH*6 -0.11215 0.50983 0.77251 # 14
#XH*7 -0.16055 0.70941 0.96452 # 15
#XH8 -0.01662 0.64937 0.56187 # 16
N1+ 0.94148 0.20080 -0.24043 # 17
O2+ 0.96000 0.32886 -0.21688 # 18
O3+ 0.78681 0.19546 -0.40992 # 19
O4+ 1.07763 0.07809 -0.09448 # 20
#END

data_HF_NO3_2
_chemical_name_systematic
;RAS NNO22_C2_PVDZ
```



E(total)=-1.71796E+02 E(coul)=-1.61374E+02 E(vdW)=-1.04224E+01 Density= 1.68628

;

\_cell\_length\_a 7.268  
\_cell\_length\_b 8.539  
\_cell\_length\_c 7.041  
\_cell\_angle\_alpha 90.00  
\_cell\_angle\_beta 74.88  
\_cell\_angle\_gamma 90.00  
\_cell\_formula\_units\_Z 4  
\_symmetry\_space\_group\_name\_H-M 'P 21/C '

\_symmetry\_Int\_Tables\_number 14

loop\_

\_symmetry\_equiv\_pos\_as\_xyz

1 x,y,z  
2 -x,1/2+y,1/2-z  
3 -x,-y,-z  
4 x,1/2-y,1/2+z

loop\_

\_atom\_site\_label

\_atom\_site\_fract\_x

\_atom\_site\_fract\_y

\_atom\_site\_fract\_z

|       |         |         |         |      |
|-------|---------|---------|---------|------|
| C1    | 0.79508 | 0.41250 | 0.37700 | # 1  |
| N2    | 0.85147 | 0.26876 | 0.39838 | # 2  |
| H*3   | 0.96671 | 0.25051 | 0.45125 | # 3  |
| H*4   | 0.78416 | 0.17282 | 0.36394 | # 4  |
| N5    | 0.64798 | 0.44962 | 0.30997 | # 5  |
| H*6   | 0.61428 | 0.56372 | 0.29814 | # 6  |
| H*7   | 0.56436 | 0.36815 | 0.26845 | # 7  |
| H8    | 0.87650 | 0.50820 | 0.41798 | # 8  |
| #XC1  | 0.79322 | 0.41031 | 0.37607 | # 9  |
| #XN2  | 0.85872 | 0.27038 | 0.40180 | # 10 |
| #XH*3 | 0.99899 | 0.23958 | 0.46587 | # 11 |
| #XH*4 | 0.77621 | 0.15510 | 0.35966 | # 12 |
| #XN5  | 0.64853 | 0.45717 | 0.31048 | # 13 |
| #XH*6 | 0.59921 | 0.59487 | 0.29219 | # 14 |
| #XH*7 | 0.54830 | 0.35765 | 0.26064 | # 15 |
| #XH8  | 0.87028 | 0.50089 | 0.41485 | # 16 |
| N1+   | 0.27694 | 0.15154 | 0.62725 | # 17 |
| O2+   | 0.41737 | 0.23302 | 0.64249 | # 18 |
| O3+   | 0.25060 | 0.01709 | 0.70421 | # 19 |
| O4+   | 0.16284 | 0.20452 | 0.53505 | # 20 |

#END

data\_HF\_NO3\_3

\_chemical\_name\_systematic

;RAS NNO22\_C2\_PVDZ

E(total)=-1.71775E+02 E(coul)=-1.60456E+02 E(vdW)=-1.13191E+01 Density= 1.72377

;

\_cell\_length\_a 6.581  
\_cell\_length\_b 11.746

```

_cell_length_c 5.339
_cell_angle_alpha 90.00
_cell_angle_beta 90.97
_cell_angle_gamma 90.00
_cell_formula_units_Z 4
_symmetry_space_group_name_H-M 'P 21/A '
_symmetry_Int_Tables_number 14
loop_
_symmetry_equiv_pos_as_xyz
  1 x,y,z
  2 1/2-x,1/2+y,-z
  3 -x,-y,-z
  4 1/2+x,1/2-y,z
loop_
_atom_site_label
_atom_site_fract_x
_atom_site_fract_y
_atom_site_fract_z
C1 0.38251 -0.35308 1.02067 # 1
N2 0.30735 -0.31580 0.80611 # 2
H*3 0.36878 -0.24635 0.72405 # 3
H*4 0.18825 -0.35377 0.71612 # 4
N5 0.31486 -0.44208 1.14329 # 5
H*6 0.38180 -0.46504 1.30800 # 6
H*7 0.19636 -0.49016 1.08030 # 7
H8 0.51067 -0.30667 1.10318 # 8
#XC1 0.37957 -0.35415 1.01878 # 9
#XN2 0.31336 -0.31150 0.80452 # 10
#XH*3 0.38145 -0.22675 0.69354 # 11
#XH*4 0.16920 -0.35809 0.69723 # 12
#XN5 0.32113 -0.44193 1.15278 # 13
#XH*6 0.39622 -0.47483 1.35594 # 14
#XH*7 0.17762 -0.49952 1.07487 # 15
#XH8 0.50089 -0.31022 1.09688 # 16
N1+ 0.34540 0.90108 0.36106 # 17
O2+ 0.17732 0.94330 0.42385 # 18
O3+ 0.39644 0.90194 0.13413 # 19
O4+ 0.46244 0.85800 0.52519 # 20
#END

```

**S7.** Optimized crystal structure coordinates for azidoformamidinium nitrate (ionic form).

```

data_N3F_NO3_1
_chemical_name_systematic
;RAS NNO22_C2_PVDZ

```

```

E(total)=-1.68167E+02 E(coul)=-1.58152E+02 E(vdW)=-1.00151E+01 Density= 1.64386
;

```

```

_cell_length_a 11.021
_cell_length_b 9.527
_cell_length_c 6.377
_cell_angle_alpha 90.00

```

```

_cell_angle_beta 116.64
_cell_angle_gamma 90.00
_cell_formula_units_Z 4
_symmetry_space_group_name_H-M 'P 21/A '
_symmetry_Int_Tables_number 14
loop_
_symmetry_equiv_pos_as_xyz
  1 x,y,z
  2 1/2-x,1/2+y,-z
  3 -x,-y,-z
  4 1/2+x,1/2-y,z
loop_
_atom_site_label
_atom_site_fract_x
_atom_site_fract_y
_atom_site_fract_z
C1      0.52616 0.25211 0.09699      # 1
N2      0.61749 0.35530 0.17513      # 2
H*3     0.68035 0.36814 0.34788      # 3
H*4     0.62692 0.42473 0.06307      # 4
N5      0.44395 0.23582 -0.12995     # 5
H*6     0.37582 0.15609 -0.18264     # 6
H*7     0.44691 0.30068 -0.25320     # 7
N'8     0.50800 0.15463 0.23877      # 8
N9      0.58291 0.16381 0.45714      # 9
N'10    0.64054 0.15675 0.65402      # 10
#XC1    0.52348 0.25410 0.08441      # 11
#XN2    0.61818 0.35096 0.18620      # 12
#XH*3   0.70426 0.38210 0.39502      # 13
#XH*4   0.63285 0.44498 0.04046      # 14
#XN5    0.44410 0.23720 -0.13230     # 15
#XH*6   0.35530 0.13947 -0.21360     # 16
#XH*7   0.44014 0.31127 -0.29625     # 17
#XN'8   0.50831 0.14821 0.25286      # 18
#XN9    0.58500 0.15703 0.47761      # 19
#XN'10  0.64636 0.16935 0.64668      # 20
N1+     0.17077 -0.03525 0.67467      # 21
O2+     0.11443 -0.13723 0.53924      # 22
O3+     0.24410 0.04896 0.62878      # 23
O4+     0.15379 -0.01747 0.85598      # 24
#END

```

```

data_N3F_NO3_2
_chemical_name_systematic
;RAS NNO22_C2_PVDZ

```

E(total)=-1.67877E+02 E(coul)=-1.57774E+02 E(vdW)=-1.01034E+01 Density= 1.67508  
;

```

_cell_length_a 10.737
_cell_length_b 9.907
_cell_length_c 6.351
_cell_angle_alpha 90.00

```

```

_cell_angle_beta 60.39
_cell_angle_gamma 90.00
_cell_formula_units_Z 4
_symmetry_space_group_name_H-M 'P 21/A '
_symmetry_Int_Tables_number 14
loop_
_symmetry_equiv_pos_as_xyz
  1 x,y,z
  2 1/2-x,1/2+y,-z
  3 -x,-y,-z
  4 1/2+x,1/2-y,z
loop_
_atom_site_label
_atom_site_fract_x
_atom_site_fract_y
_atom_site_fract_z
C1 -0.24404 -0.03546 0.12461 # 1
N2 -0.13689 -0.12440 0.02954 # 2
H*3 -0.12229 -0.18745 -0.10614 # 3
H*4 -0.06608 -0.13174 0.09067 # 4
N5 -0.26263 0.04702 0.30266 # 5
H*6 -0.34536 0.11329 0.37027 # 6
H*7 -0.19663 0.04609 0.37387 # 7
N'8 -0.34358 -0.02019 0.05061 # 8
N9 -0.33239 -0.09553 -0.11848 # 9
N'10 -0.33814 -0.15393 -0.26562 # 10
#XC1 -0.24208 -0.03268 0.13347 # 11
#XN2 -0.14128 -0.12524 0.02263 # 12
#XH*3 -0.10750 -0.21115 -0.14679 # 13
#XH*4 -0.04536 -0.13709 0.10085 # 14
#XN5 -0.26123 0.04692 0.30397 # 15
#XH*6 -0.36276 0.13348 0.39955 # 16
#XH*7 -0.18604 0.05325 0.40292 # 17
#XN'8 -0.35009 -0.02070 0.04212 # 18
#XN9 -0.33923 -0.09785 -0.13169 # 19
#XN'10 -0.32519 -0.15941 -0.26441 # 20
N1+ 0.45886 0.32798 0.58497 # 21
O2+ 0.54465 0.25249 0.41449 # 22
O3+ 0.37211 0.40183 0.55743 # 23
O4+ 0.45981 0.32962 0.78298 # 24
#END

```

```

data_N3F_NO3_3
_chemical_name_systematic
;RAS NNO22_C2_PVDZ

```

E(total)=-1.67244E+02 E(coul)=-1.56477E+02 E(vdW)=-1.07670E+01 Density= 1.71976  
;

```

_cell_length_a 14.369
_cell_length_b 6.373
_cell_length_c 6.257
_cell_angle_alpha 90.00

```

```

_cell_angle_beta 93.25
_cell_angle_gamma 90.00
_cell_formula_units_Z 4
_symmetry_space_group_name_H-M 'P 21/A '
_symmetry_Int_Tables_number 14
loop_
_symmetry_equiv_pos_as_xyz
  1 x,y,z
  2 1/2-x,1/2+y,-z
  3 -x,-y,-z
  4 1/2+x,1/2-y,z
loop_
_atom_site_label
_atom_site_fract_x
_atom_site_fract_y
_atom_site_fract_z
C1 -0.61620 0.44322 -0.25004 # 1
N2 -0.61703 0.41652 -0.46151 # 2
H*3 -0.64311 0.28526 -0.53350 # 3
H*4 -0.59135 0.52775 -0.55766 # 4
N5 -0.58188 0.61585 -0.15653 # 5
H*6 -0.58246 0.63045 0.00470 # 6
H*7 -0.55493 0.73433 -0.24115 # 7
N'8 -0.64977 0.29927 -0.11069 # 8
N9 -0.68353 0.13098 -0.18875 # 9
N'10 -0.71569 -0.02589 -0.23094 # 10
#XC1 -0.61397 0.45377 -0.25018 # 11
#XN2 -0.61928 0.40638 -0.45665 # 12
#XH*3 -0.64905 0.25295 -0.57236 # 13
#XH*4 -0.58547 0.55228 -0.58851 # 14
#XN5 -0.58135 0.61816 -0.15840 # 15
#XH*6 -0.57940 0.64918 0.04391 # 16
#XH*7 -0.54688 0.77166 -0.24854 # 17
#XN'8 -0.65274 0.28606 -0.10286 # 18
#XN9 -0.68755 0.11265 -0.18203 # 19
#XN'10 -0.71311 -0.01590 -0.25204 # 20
N1+ -0.41991 0.06146 0.71494 # 21
O2+ -0.34827 -0.04299 0.67503 # 22
O3+ -0.41457 0.25808 0.73739 # 23
O4+ -0.49690 -0.03070 0.73241 # 24
#END

```

```

data_N3F_NO3_4
_chemical_name_systematic
;RAS NNO22_C2_PVDZ

```

E(total)=-1.66770E+02 E(coul)=-1.57314E+02 E(vdW)=-9.45683E+00 Density= 1.63920  
;

```

_cell_length_a 6.340
_cell_length_b 6.261
_cell_length_c 7.884
_cell_angle_alpha 92.70

```

```

_cell_angle_beta 73.79
_cell_angle_gamma 89.03
_cell_formula_units_Z 2
_symmetry_space_group_name_H-M 'P -1 '
_symmetry_Int_Tables_number 2
loop_
_symmetry_equiv_pos_as_xyz
  1 x,y,z
  2 -x,-y,-z
loop_
_atom_site_label
_atom_site_fract_x
_atom_site_fract_y
_atom_site_fract_z
C1 0.36156 -0.24549 0.72495 # 1
N2 0.33938 -0.03335 0.72467 # 2
H*3 0.19200 0.04419 0.77379 # 3
H*4 0.47052 0.05772 0.67485 # 4
N5 0.55545 -0.34630 0.66028 # 5
H*6 0.56576 -0.50779 0.66281 # 6
H*7 0.69442 -0.26705 0.60814 # 7
N'8 0.19125 -0.37823 0.79020 # 8
N9 0.00172 -0.29302 0.85392 # 9
N'10 -0.17617 -0.24409 0.91491 # 10
#XC1 0.37363 -0.24581 0.72069 # 11
#XN2 0.32758 -0.03776 0.72901 # 12
#XH*3 0.15655 0.08437 0.78478 # 13
#XH*4 0.49983 0.08744 0.66336 # 14
#XN5 0.55816 -0.34454 0.65926 # 15
#XH*6 0.58564 -0.54773 0.65731 # 16
#XH*7 0.73745 -0.26131 0.59272 # 17
#XN'8 0.17582 -0.38548 0.79593 # 18
#XN9 -0.01954 -0.29893 0.86166 # 19
#XN'10 -0.16390 -0.22348 0.90979 # 20
N1+ 0.11041 0.78009 0.35241 # 21
O2+ 0.31170 0.76464 0.34480 # 22
O3+ 0.05331 0.80932 0.21390 # 23
O4+ -0.03377 0.76632 0.49852 # 24
#END

```

```

data_N3F_NO3_5
_chemical_name_systematic
;RAS NNO22_C2_PVDZ

```

E(total)=-1.66698E+02 E(coul)=-1.57495E+02 E(vdW)=-9.20327E+00 Density= 1.56672

;

```

_cell_length_a 7.181
_cell_length_b 6.267
_cell_length_c 8.067
_cell_angle_alpha 105.82
_cell_angle_beta 86.67
_cell_angle_gamma 115.72

```

```

_cell_formula_units_Z 2
_symmetry_space_group_name_H-M 'P -1 '
_symmetry_Int_Tables_number 2
loop_
_symmetry_equiv_pos_as_xyz
  1 x,y,z
  2 -x,-y,-z
loop_
_atom_site_label
_atom_site_fract_x
_atom_site_fract_y
_atom_site_fract_z
C1      0.29146 -0.06197  0.27164      # 1
N2      0.26897 -0.12539  0.09968      # 2
H*3     0.20150 -0.30360  0.02872      # 3
H*4     0.31916  0.00394  0.03404      # 4
N5      0.38015  0.17225  0.36403      # 5
H*6     0.39447  0.21323  0.49456      # 6
H*7     0.43439  0.31246  0.30836      # 7
N'8     0.22718 -0.22729  0.36853      # 8
N9      0.14131 -0.45381  0.28894      # 9
N'10    0.06262 -0.66075  0.23922      # 10
#XC1    0.29662 -0.04847  0.27260      # 11
#XN2    0.26422 -0.13773  0.10255      # 12
#XH*3   0.18395 -0.35039 -0.00566      # 13
#XH*4   0.32980  0.03113  0.01185      # 14
#XN5    0.38119  0.17495  0.36277      # 15
#XH*6   0.40538  0.24264  0.52784      # 16
#XH*7   0.45234  0.35931  0.30624      # 17
#XN'8   0.22106 -0.24314  0.37345      # 18
#XN9    0.13263 -0.47639  0.29245      # 19
#XN'10  0.06657 -0.65086  0.22335      # 20
N1+     0.68393 -0.33800  0.16463      # 21
O2+     0.66049 -0.20298  0.08467      # 22
O3+     0.81351 -0.42514  0.11786      # 23
O4+     0.57781 -0.38587  0.29135      # 24
#END

```

**S8.** Optimized crystal structure coordinates for guanidinium nitrate (ionic form).

```

data_GH_NO3_1
_chemical_name_systematic
;RAS NNO22_C2_PVDZ

```

E(total)=-1.81912E+02 E(coul)=-1.68905E+02 E(vdW)=-1.30072E+01 Density= 1.85121

;

```

_cell_length_a  3.448
_cell_length_b 13.231
_cell_length_c  7.312
_cell_angle_alpha  90.54
_cell_angle_beta  123.75
_cell_angle_gamma  39.73

```

```

_cell_formula_units_Z 1
_symmetry_space_group_name_H-M 'P 1 '
_symmetry_Int_Tables_number 1
loop_
_symmetry_equiv_pos_as_xyz
  1 x,y,z
loop_
_atom_site_label
_atom_site_fract_x
_atom_site_fract_y
_atom_site_fract_z
C1      0.43668  0.16474  0.53575      # 1
N2      -0.38756  0.37149  0.21744      # 2
H*3     -0.79190  0.51692  0.15112      # 3
H*4     -0.63015  0.38833  0.03394      # 4
N5       0.74035  0.14759  0.77347      # 5
H*6     1.36092 -0.00691  1.01548      # 6
H*7     0.35812  0.28863  0.71804      # 7
N8       0.95726 -0.02485  0.61633      # 8
H*9     0.74102 -0.01578  0.44064      # 9
H*10    1.58208 -0.18274  0.85526      # 10
#XN2    -0.38066  0.36976  0.22011      # 11
#XH*3   -0.79103  0.51484  0.14765      # 12
#XH*4   -0.63614  0.39170  0.03543      # 13
#XN5     0.73781  0.14774  0.77148      # 14
#XH*6    1.34063 -0.00071  1.00992      # 15
#XH*7    0.38029  0.28232  0.72507      # 16
#XN8     0.95290 -0.02326  0.61565      # 17
#XH*9    0.76044 -0.01990  0.44967      # 18
#XH*10   1.56589 -0.17979  0.84673      # 19
#XLP2+  -0.59338  0.39752  0.18886      # 20
#XLP2-  -0.14942  0.33736  0.25850      # 21
#XLP5+   0.51242  0.17801  0.73399      # 22
#XLP5-   0.95638  0.11785  0.80363      # 23
#XLP8+   0.72507  0.00895  0.57993      # 24
#XLP8-   1.16903 -0.05122  0.64957      # 25
N1+     0.50765  0.63100  0.46291      # 26
O2+     1.24952  0.44033  0.75688      # 27
O3+     0.20918  0.64966  0.23586      # 28
O4+     0.06424  0.80303  0.39597      # 29
#END

```

```

data_GH_NO3_2
_chemical_name_systematic
;RAS NNO22_C2_PVDZ

```

```

E(total)=-1.77267E+02 E(coul)=-1.64586E+02 E(vdW)=-1.26811E+01 Density= 1.59517
;

```

```

_cell_length_a 12.204
_cell_length_b 7.067
_cell_length_c 13.395
_cell_angle_alpha 90.00

```



```

_cell_angle_beta 118.33
_cell_angle_gamma 90.00
_cell_formula_units_Z 8
_symmetry_space_group_name_H-M 'C 2/C '
_symmetry_Int_Tables_number 15
loop_
_symmetry_equiv_pos_as_xyz
  1 x,y,z
  2 -x,y,1/2-z
  3 -x,-y,-z
  4 x,-y,1/2+z
  5 1/2+x,1/2+y,z
  6 1/2-x,1/2+y,1/2-z
  7 1/2-x,1/2-y,-z
  8 1/2+x,1/2-y,1/2+z
loop_
_atom_site_label
_atom_site_fract_x
_atom_site_fract_y
_atom_site_fract_z
C1      0.31243  0.13702 -0.12506      # 1
N2      0.25782  0.30092 -0.12474      # 2
H*3     0.17583  0.30417 -0.12324      # 3
H*4     0.29695  0.42633 -0.12600      # 4
N5      0.25852 -0.02685 -0.12337      # 5
H*6     0.29818 -0.15228 -0.12357      # 6
H*7     0.17655 -0.03003 -0.12184      # 7
N8      0.42094  0.13698 -0.12707      # 8
H*9     0.46327  0.25917 -0.12837      # 9
H*10    0.46379  0.01476 -0.12734      # 10
#XN2    0.25828  0.29955 -0.12474      # 11
#XH*3   0.17823  0.30726 -0.12330      # 12
#XH*4   0.29421  0.42425 -0.12594      # 13
#XN5    0.25897 -0.02547 -0.12338      # 14
#XH*6   0.29544 -0.15020 -0.12353      # 15
#XH*7   0.17895 -0.03313 -0.12187      # 16
#XN8    0.42003  0.13698 -0.12705      # 17
#XH*9   0.46361  0.25400 -0.12835      # 18
#XH*10  0.46411  0.01993 -0.12737      # 19
#XLP2+  0.24270  0.29736 -0.15484      # 20
#XLP2-  0.27508  0.29806 -0.09466      # 21
#XLP5+  0.24339 -0.02399 -0.15349      # 22
#XLP5-  0.27577 -0.02328 -0.09331      # 23
#XLP8+  0.40263  0.13663 -0.15712      # 24
#XLP8-  0.43500  0.13733 -0.09694      # 25
N1+     0.52137  0.36295  0.12500      # 26
O2+     0.62567  0.36291  0.12664      # 27
O3+     0.46919  0.20823  0.12417      # 28
O4+     0.46925  0.51771  0.12421      # 29
#END

```

data\_GH\_NO3\_3

\_chemical\_name\_systematic  
;RAS NNO22\_C2\_PVDZ

E(total)=-1.77264E+02 E(coul)=-1.64623E+02 E(vdW)=-1.26408E+01 Density= 1.59375

;  
\_cell\_length\_a 6.989  
\_cell\_length\_b 12.249  
\_cell\_length\_c 7.041  
\_cell\_angle\_alpha 90.00  
\_cell\_angle\_beta 122.41  
\_cell\_angle\_gamma 90.00  
\_cell\_formula\_units\_Z 4  
\_symmetry\_space\_group\_name\_H-M 'P 21/A ' ' '  
\_symmetry\_Int\_Tables\_number 14  
loop\_  
\_symmetry\_equiv\_pos\_as\_xyz  
1 x,y,z  
2 1/2-x,1/2+y,-z  
3 -x,-y,-z  
4 1/2+x,1/2-y,z  
loop\_  
\_atom\_site\_label  
\_atom\_site\_fract\_x  
\_atom\_site\_fract\_y  
\_atom\_site\_fract\_z  
C1 0.75024 0.87039 0.24986 # 1  
N2 0.75041 0.76121 0.24993 # 2  
H\*3 0.75309 0.71838 0.12870 # 3  
H\*4 0.74788 0.71836 0.37122 # 4  
N5 0.75364 0.92499 0.08721 # 5  
H\*6 0.75358 1.00747 0.08397 # 6  
H\*7 0.75638 0.88536 -0.03721 # 7  
N8 0.74665 0.92496 0.41244 # 8  
H\*9 0.74404 0.88532 0.53691 # 9  
H\*10 0.74645 1.00744 0.41557 # 10  
#XN2 0.75041 0.76213 0.24993 # 11  
#XH\*3 0.75298 0.71804 0.13384 # 12  
#XH\*4 0.74799 0.71802 0.36609 # 13  
#XN5 0.75362 0.92453 0.08857 # 14  
#XH\*6 0.75365 1.00505 0.08090 # 15  
#XH\*7 0.75633 0.88812 -0.03515 # 16  
#XN8 0.74668 0.92451 0.41108 # 17  
#XH\*9 0.74408 0.88807 0.53484 # 18  
#XH\*10 0.74639 1.00503 0.41864 # 19  
#XLP2+ 0.69028 0.76333 0.21704 # 20  
#XLP2- 0.81054 0.76338 0.28282 # 21  
#XLP5+ 0.69345 0.92390 0.05751 # 22  
#XLP5- 0.81370 0.92394 0.12329 # 23  
#XLP8+ 0.68660 0.92387 0.37636 # 24  
#XLP8- 0.80685 0.92392 0.44214 # 25  
N1+ 0.25026 -0.20297 0.74987 # 26  
O2+ 0.25023 -0.30605 0.74987 # 27

```

O3+    0.24809 -0.15144  0.59341    # 28
O4+    0.25245 -0.15143  0.90634    # 29
#END

```

**S9.** Optimized crystal structure coordinates for nitroformamidinium nitrate (ionic form).

```

data_NO2F_NO3_1
  _chemical_name_systematic
;RAS NNO22_C2_PVDZ

```

```

E(total)=-1.78243E+02 E(coul)=-1.65559E+02 E(vdW)=-1.26842E+01 Density= 1.79816
;

```

```

  _cell_length_a  10.935
  _cell_length_b   9.860
  _cell_length_c   5.991
  _cell_angle_alpha  90.00
  _cell_angle_beta  119.56
  _cell_angle_gamma  90.00
  _cell_formula_units_Z  4
  _symmetry_space_group_name_H-M 'P 21/A '
  _symmetry_Int_Tables_number 14

```

```
loop_
```

```
  _symmetry_equiv_pos_as_xyz
```

```

1 x,y,z
2 1/2-x,1/2+y,-z
3 -x,-y,-z
4 1/2+x,1/2-y,z

```

```
loop_
```

```
  _atom_site_label
```

```
  _atom_site_fract_x
```

```
  _atom_site_fract_y
```

```
  _atom_site_fract_z
```

```

C1      -0.04434  0.25756  0.36471    # 1
N2       0.04444  0.21950  0.59833    # 2
H*3     0.10465  0.13590  0.62166    # 3
H*4     0.05554  0.26950  0.75555    # 4
N5     -0.13196  0.35932  0.28421    # 5
H*6    -0.14096  0.42524  0.40564    # 6
H*7    -0.19346  0.37217  0.09083    # 7
N8     -0.04594  0.16913  0.15216    # 8
O9     -0.12840  0.20422 -0.06542    # 9
O10     0.03544  0.07437  0.22631    # 10
#XC1    -0.04434  0.25760  0.36481    # 11
#XN2     0.04686  0.20924  0.58312    # 12
#XH*3    0.12802  0.12346  0.67748    # 13
#XH*4    0.05781  0.27647  0.78010    # 14
#XN5    -0.13468  0.35312  0.25985    # 15
#XH*6   -0.14292  0.43557  0.42265    # 16
#XH*7   -0.21661  0.39660  0.06381    # 17
#XN8    -0.04586  0.17342  0.16248    # 18
#XO9    -0.11987  0.18778 -0.07286    # 19
#XO10    0.02657  0.07172  0.18790    # 20

```

|     |         |          |         |      |
|-----|---------|----------|---------|------|
| N1+ | 0.67945 | 0.05669  | 0.20627 | # 21 |
| O2+ | 0.62704 | 0.15690  | 0.05759 | # 22 |
| O3+ | 0.64582 | 0.03337  | 0.37623 | # 23 |
| O4+ | 0.76548 | -0.02020 | 0.18498 | # 24 |

#END

data\_NO2F\_NO3\_2  
\_chemical\_name\_systematic  
;RAS NNO22\_C2\_PVDZ

E(total)=-1.78015E+02 E(coul)=-1.62878E+02 E(vdW)=-1.51373E+01 Density= 1.92897  
;

\_cell\_length\_a 6.422  
\_cell\_length\_b 6.160  
\_cell\_length\_c 13.358  
\_cell\_angle\_alpha 90.00  
\_cell\_angle\_beta 82.36  
\_cell\_angle\_gamma 90.00  
\_cell\_formula\_units\_Z 4  
\_symmetry\_space\_group\_name\_H-M 'P 21/C '  
\_symmetry\_Int\_Tables\_number 14

loop\_  
\_symmetry\_equiv\_pos\_as\_xyz  
1 x,y,z  
2 -x,1/2+y,1/2-z  
3 -x,-y,-z  
4 x,1/2-y,1/2+z

loop\_  
\_atom\_site\_label  
\_atom\_site\_fract\_x  
\_atom\_site\_fract\_y  
\_atom\_site\_fract\_z

|       |          |          |         |      |
|-------|----------|----------|---------|------|
| C1    | 0.21544  | -0.55749 | 0.63074 | # 1  |
| N2    | 0.31727  | -0.38035 | 0.60168 | # 2  |
| H*3   | 0.47442  | -0.37521 | 0.60664 | # 3  |
| H*4   | 0.24653  | -0.24926 | 0.57468 | # 4  |
| N5    | 0.01708  | -0.60459 | 0.63202 | # 5  |
| H*6   | -0.08786 | -0.49905 | 0.60848 | # 6  |
| H*7   | -0.03287 | -0.75415 | 0.65790 | # 7  |
| N8    | 0.34945  | -0.73799 | 0.66929 | # 8  |
| O9    | 0.25526  | -0.90302 | 0.69638 | # 9  |
| O10   | 0.53406  | -0.69477 | 0.66821 | # 10 |
| #XC1  | 0.21538  | -0.55740 | 0.63072 | # 11 |
| #XN2  | 0.33411  | -0.39389 | 0.60483 | # 12 |
| #XH*3 | 0.50492  | -0.33341 | 0.60003 | # 13 |
| #XH*4 | 0.23703  | -0.22892 | 0.57055 | # 14 |
| #XN5  | 0.02518  | -0.62466 | 0.63605 | # 15 |
| #XH*6 | -0.10457 | -0.48409 | 0.60507 | # 16 |
| #XH*7 | -0.08153 | -0.77149 | 0.65929 | # 17 |
| #XN8  | 0.34294  | -0.72923 | 0.66742 | # 18 |
| #XO9  | 0.28452  | -0.91144 | 0.69905 | # 19 |
| #XO10 | 0.53371  | -0.72530 | 0.67386 | # 20 |

|     |         |          |          |      |
|-----|---------|----------|----------|------|
| N1+ | 0.21968 | 0.09030  | -0.58041 | # 21 |
| O2+ | 0.16159 | 0.00607  | -0.65831 | # 22 |
| O3+ | 0.25927 | 0.29095  | -0.57863 | # 23 |
| O4+ | 0.23819 | -0.02611 | -0.50429 | # 24 |

#END

data\_NO2F\_NO3\_3  
\_chemical\_name\_systematic  
;RAS NNO22\_C2\_PVDZ

E(total)=-1.77897E+02 E(coul)=-1.63086E+02 E(vdW)=-1.48108E+01 Density= 1.92875  
;

\_cell\_length\_a 8.912  
\_cell\_length\_b 13.176  
\_cell\_length\_c 6.190  
\_cell\_angle\_alpha 90.00  
\_cell\_angle\_beta 133.89  
\_cell\_angle\_gamma 90.00  
\_cell\_formula\_units\_Z 4  
\_symmetry\_space\_group\_name\_H-M 'P 21/A '  
\_symmetry\_Int\_Tables\_number 14  
loop\_

\_symmetry\_equiv\_pos\_as\_xyz  
1 x,y,z  
2 1/2-x,1/2+y,-z  
3 -x,-y,-z  
4 1/2+x,1/2-y,z

loop\_  
\_atom\_site\_label  
\_atom\_site\_fract\_x  
\_atom\_site\_fract\_y  
\_atom\_site\_fract\_z

|       |          |         |         |      |
|-------|----------|---------|---------|------|
| C1    | 0.25371  | 0.36921 | 0.80934 | # 1  |
| N2    | 0.05513  | 0.36551 | 0.65466 | # 2  |
| H*3   | 0.01146  | 0.33979 | 0.75984 | # 3  |
| H*4   | -0.05591 | 0.38704 | 0.43627 | # 4  |
| N5    | 0.34862  | 0.39865 | 0.72864 | # 5  |
| H*6   | 0.27102  | 0.42395 | 0.51869 | # 6  |
| H*7   | 0.50742  | 0.39579 | 0.88486 | # 7  |
| N8    | 0.39760  | 0.33349 | 1.13608 | # 8  |
| O9    | 0.58243  | 0.33683 | 1.28067 | # 9  |
| O10   | 0.30986  | 0.30606 | 1.21196 | # 10 |
| #XC1  | 0.25364  | 0.36923 | 0.80918 | # 11 |
| #XN2  | 0.06425  | 0.36170 | 0.68399 | # 12 |
| #XH*3 | -0.03699 | 0.33784 | 0.72795 | # 13 |
| #XH*4 | -0.07350 | 0.39013 | 0.40344 | # 14 |
| #XN5  | 0.36629  | 0.39581 | 0.76013 | # 15 |
| #XH*6 | 0.26047  | 0.42784 | 0.48763 | # 16 |
| #XH*7 | 0.53637  | 0.40258 | 0.87249 | # 17 |
| #XN8  | 0.39061  | 0.33523 | 1.12021 | # 18 |
| #XO9  | 0.58348  | 0.33134 | 1.31227 | # 19 |
| #XO10 | 0.33985  | 0.30384 | 1.25085 | # 20 |

|     |         |         |         |      |
|-----|---------|---------|---------|------|
| N1+ | 0.30398 | 0.08072 | 0.89073 | # 21 |
| O2+ | 0.38388 | 0.15825 | 0.88385 | # 22 |
| O3+ | 0.26234 | 0.00371 | 0.73571 | # 23 |
| O4+ | 0.26572 | 0.08020 | 1.05263 | # 24 |

#END

data\_NO2F\_NO3\_4  
 \_chemical\_name\_systematic  
 ;RAS NNO22\_C2\_PVDZ

E(total)=-1.77744E+02 E(coul)=-1.63730E+02 E(vdW)=-1.40136E+01 Density= 1.88325  
 ;

\_cell\_length\_a 9.575  
 \_cell\_length\_b 8.706  
 \_cell\_length\_c 6.693  
 \_cell\_angle\_alpha 90.00  
 \_cell\_angle\_beta 105.97  
 \_cell\_angle\_gamma 90.00  
 \_cell\_formula\_units\_Z 4  
 \_symmetry\_space\_group\_name\_H-M 'P 21/A '  
 \_symmetry\_Int\_Tables\_number 14  
 loop\_

\_symmetry\_equiv\_pos\_as\_xyz  
 1 x,y,z  
 2 1/2-x,1/2+y,-z  
 3 -x,-y,-z  
 4 1/2+x,1/2-y,z

loop\_  
 \_atom\_site\_label  
 \_atom\_site\_fract\_x  
 \_atom\_site\_fract\_y  
 \_atom\_site\_fract\_z

|       |          |          |         |      |
|-------|----------|----------|---------|------|
| C1    | -0.20269 | -0.69298 | 0.22857 | # 1  |
| N2    | -0.12165 | -0.62119 | 0.13071 | # 2  |
| H*3   | -0.06214 | -0.68589 | 0.05680 | # 3  |
| H*4   | -0.11582 | -0.50480 | 0.12562 | # 4  |
| N5    | -0.28773 | -0.63788 | 0.33353 | # 5  |
| H*6   | -0.30083 | -0.52339 | 0.35155 | # 6  |
| H*7   | -0.34280 | -0.71409 | 0.39955 | # 7  |
| N8    | -0.19715 | -0.86909 | 0.21870 | # 8  |
| O9    | -0.27240 | -0.93625 | 0.30956 | # 9  |
| O10   | -0.11815 | -0.92075 | 0.12119 | # 10 |
| #XC1  | -0.20269 | -0.69289 | 0.22857 | # 11 |
| #XN2  | -0.11871 | -0.63734 | 0.12684 | # 12 |
| #XH*3 | -0.04061 | -0.67175 | 0.03073 | # 13 |
| #XH*4 | -0.11437 | -0.48738 | 0.12415 | # 14 |
| #XN5  | -0.28963 | -0.65452 | 0.33557 | # 15 |
| #XH*6 | -0.30336 | -0.50637 | 0.35495 | # 16 |
| #XH*7 | -0.36508 | -0.70436 | 0.42696 | # 17 |
| #XN8  | -0.19742 | -0.86053 | 0.21918 | # 18 |
| #XO9  | -0.26361 | -0.95443 | 0.29849 | # 19 |
| #XO10 | -0.12574 | -0.94058 | 0.13013 | # 20 |

|     |          |         |         |      |
|-----|----------|---------|---------|------|
| N1+ | -0.00564 | 0.24090 | 0.71574 | # 21 |
| O2+ | 0.04882  | 0.31736 | 0.87891 | # 22 |
| O3+ | 0.04758  | 0.25092 | 0.56330 | # 23 |
| O4+ | -0.11332 | 0.15442 | 0.70501 | # 24 |

#END

data\_NO2F\_NO3\_5  
 \_chemical\_name\_systematic  
 ;RAS NNO22\_C2\_PVDZ

E(total)=-1.77696E+02 E(coul)=-1.62384E+02 E(vdW)=-1.53120E+01 Density= 1.93460  
 ;

\_cell\_length\_a 6.217  
 \_cell\_length\_b 6.380  
 \_cell\_length\_c 13.166  
 \_cell\_angle\_alpha 90.00  
 \_cell\_angle\_beta 90.00  
 \_cell\_angle\_gamma 90.00  
 \_cell\_formula\_units\_Z 4  
 \_symmetry\_space\_group\_name\_H-M 'P 212121'  
 \_symmetry\_Int\_Tables\_number 19

loop\_

\_symmetry\_equiv\_pos\_as\_xyz

1 x,y,z  
 2 1/2+x,1/2-y,-z  
 3 -x,1/2+y,1/2-z  
 4 1/2-x,-y,1/2+z

loop\_

\_atom\_site\_label

\_atom\_site\_fract\_x

\_atom\_site\_fract\_y

\_atom\_site\_fract\_z

|       |         |          |          |      |
|-------|---------|----------|----------|------|
| C1    | 0.44715 | -0.07183 | -0.11891 | # 1  |
| N2    | 0.62444 | 0.02084  | -0.14700 | # 2  |
| H*3   | 0.63145 | 0.18027  | -0.14148 | # 3  |
| H*4   | 0.75389 | -0.05907 | -0.17380 | # 4  |
| N5    | 0.39795 | -0.27058 | -0.11848 | # 5  |
| H*6   | 0.50159 | -0.38370 | -0.14202 | # 6  |
| H*7   | 0.24869 | -0.31220 | -0.09327 | # 7  |
| N8    | 0.26935 | 0.07542  | -0.08050 | # 8  |
| O9    | 0.10419 | -0.01023 | -0.05430 | # 9  |
| O10   | 0.31454 | 0.26042  | -0.08079 | # 10 |
| #XC1  | 0.44724 | -0.07190 | -0.11893 | # 11 |
| #XN2  | 0.61119 | 0.03879  | -0.14385 | # 12 |
| #XH*3 | 0.67336 | 0.20873  | -0.14785 | # 13 |
| #XH*4 | 0.77399 | -0.06997 | -0.17790 | # 14 |
| #XN5  | 0.37810 | -0.26112 | -0.11449 | # 15 |
| #XH*6 | 0.51625 | -0.40159 | -0.14544 | # 16 |
| #XH*7 | 0.23087 | -0.36061 | -0.09211 | # 17 |
| #XN8  | 0.27799 | 0.06826  | -0.08237 | # 18 |
| #XO9  | 0.09618 | 0.02002  | -0.05156 | # 19 |
| #XO10 | 0.28420 | 0.26194  | -0.07524 | # 20 |

```

N1+    0.08566 -0.02930  0.66959    # 21
O2+    0.28668 -0.05713  0.67191    # 22
O3+   -0.00040  0.05721  0.59350    # 23
O4+   -0.02931 -0.08798  0.74336    # 24
#END

```

**S10.** Optimized crystal structure coordinates for formamidine – nitric acid (cocrystal form).

```

data_F_HNO3_1
_chemical_name_systematic
;RAS NH3 PVDZ

```

```

E(total)=-4.16755E+01 E(coul)=-2.69802E+01 E(vdW)=-1.46953E+01 Density= 1.70136
;

```

```

_cell_length_a  3.998
_cell_length_b  8.675
_cell_length_c 12.054
_cell_angle_alpha  90.00
_cell_angle_beta  90.57
_cell_angle_gamma  90.00
_cell_formula_units_Z  4
_symmetry_space_group_name_H-M 'P 21/C '
_symmetry_Int_Tables_number 14

```

```

loop_
_symmetry_equiv_pos_as_xyz
  1 x,y,z
  2 -x,1/2+y,1/2-z
  3 -x,-y,-z
  4 x,1/2-y,1/2+z

```

```

loop_
_atom_site_label
_atom_site_fract_x
_atom_site_fract_y
_atom_site_fract_z
C1      0.90586  0.10749  0.60248    # 1
N2      1.09841  0.23839  0.60577    # 2
H*3     1.01047  0.33574  0.57029    # 3
H*4     1.25867  0.25020  0.67076    # 4
N'5     0.96026 -0.00684  0.66743    # 5
H*6     0.79948 -0.09477  0.64958    # 6
H7      0.71064  0.11087  0.53736    # 7
#XC1    1.05062  0.15228  0.63301    # 8
#XN2    1.11226  0.25472  0.61520    # 9
#XH*3   1.04690  0.30535  0.58550    # 10
#XH*4   1.20765  0.26353  0.64586    # 11
#XN'5   1.01166  0.02314  0.67303    # 12
#XH*6   0.79350 -0.10985  0.65351    # 13
#XH7    0.66099  0.09522  0.51906    # 14
N1+     0.44487 -0.10277  0.13418    # 15
O2+     0.23327 -0.08942  0.06355    # 16
O3+     0.55157 -0.21719  0.18060    # 17
O4+     0.59004  0.03830  0.16758    # 18

```



|        |         |          |         |      |
|--------|---------|----------|---------|------|
| H*5+   | 0.75297 | 0.00756  | 0.22402 | # 19 |
| #XN1+  | 0.38601 | -0.14241 | 0.11888 | # 20 |
| #XO2+  | 0.30406 | -0.02199 | 0.07997 | # 21 |
| #XO3+  | 0.60669 | -0.13477 | 0.19038 | # 22 |
| #XO4+  | 0.58376 | -0.01984 | 0.17135 | # 23 |
| #XH*5+ | 0.73801 | 0.01091  | 0.21879 | # 24 |
| #XLP1+ | 0.46476 | -0.12403 | 0.12094 | # 25 |
| #XLP1- | 0.39943 | -0.11974 | 0.14289 | # 26 |
| #XLP2+ | 0.31118 | -0.13223 | 0.07504 | # 27 |
| #XLP2- | 0.25653 | -0.12864 | 0.09341 | # 28 |
| #XLP3+ | 0.42340 | -0.21280 | 0.17914 | # 29 |
| #XLP3- | 0.54565 | -0.22083 | 0.13806 | # 30 |
| #XLP4+ | 0.71592 | 0.04847  | 0.14579 | # 31 |
| #XLP4- | 0.53088 | 0.06062  | 0.20797 | # 32 |
| #END   |         |          |         |      |

```
data_F_HNO3_2
  _chemical_name_systematic
;RAS NH3 PVDZ
```

```
E(total)=-4.15973E+01 E(coul)=-2.75703E+01 E(vdW)=-1.40270E+01 Density= 1.72791
;
```

```
_cell_length_a 9.140
_cell_length_b 7.143
_cell_length_c 6.553
_cell_angle_alpha 90.00
_cell_angle_beta 74.19
_cell_angle_gamma 90.00
_cell_formula_units_Z 4
_symmetry_space_group_name_H-M 'P 21/A '
_symmetry_Int_Tables_number 14
loop_
  _symmetry_equiv_pos_as_xyz
    1 x,y,z
    2 1/2-x,1/2+y,-z
    3 -x,-y,-z
    4 1/2+x,1/2-y,z
loop_
  _atom_site_label
  _atom_site_fract_x
  _atom_site_fract_y
  _atom_site_fract_z
C1 0.40847 0.32121 -0.23659 # 1
N2 0.30006 0.19146 -0.14358 # 2
H*3 0.19043 0.23174 -0.09191 # 3
H*4 0.32065 0.05660 -0.19002 # 4
N*5 0.54053 0.27354 -0.35079 # 5
H*6 0.60625 0.38911 -0.39896 # 6
H7 0.37080 0.46660 -0.19784 # 7
#XC1 0.38624 0.21473 -0.22500 # 8
#XN2 0.28848 0.17129 -0.14976 # 9
#XH*3 0.22657 0.21136 -0.11159 # 10
```

|        |          |          |          |      |
|--------|----------|----------|----------|------|
| #XH*4  | 0.29662  | 0.09795  | -0.16417 | # 11 |
| #XN'5  | 0.51772  | 0.23609  | -0.33474 | # 12 |
| #XH*6  | 0.62128  | 0.39292  | -0.41107 | # 13 |
| #XH7   | 0.37634  | 0.51054  | -0.18944 | # 14 |
| N1+    | 0.08664  | -0.29901 | 0.73648  | # 15 |
| O2+    | 0.14909  | -0.15021 | 0.72661  | # 16 |
| O3+    | -0.03757 | -0.34901 | 0.84372  | # 17 |
| O4+    | 0.17314  | -0.43601 | 0.60059  | # 18 |
| H*5+   | 0.10743  | -0.54583 | 0.62761  | # 19 |
| #XN1+  | 0.06669  | -0.24755 | 0.77490  | # 20 |
| #XO2+  | 0.19011  | -0.21670 | 0.66164  | # 21 |
| #XO3+  | 0.02011  | -0.40774 | 0.76472  | # 22 |
| #XO4+  | 0.12458  | -0.41799 | 0.65589  | # 23 |
| #XH*5+ | 0.11391  | -0.53587 | 0.62464  | # 24 |
| #XLP1+ | 0.06460  | -0.27793 | 0.73320  | # 25 |
| #XLP1- | 0.08192  | -0.29286 | 0.77640  | # 26 |
| #XLP2+ | 0.09436  | -0.17075 | 0.74682  | # 27 |
| #XLP2- | 0.10885  | -0.18324 | 0.78296  | # 28 |
| #XLP3+ | -0.00489 | -0.31494 | 0.88467  | # 29 |
| #XLP3- | -0.03731 | -0.28701 | 0.80383  | # 30 |
| #XLP4+ | 0.15455  | -0.44260 | 0.52353  | # 31 |
| #XLP4- | 0.20362  | -0.48488 | 0.64590  | # 32 |
| #END   |          |          |          |      |

```
data_F_HNO3_3
  _chemical_name_systematic
;RAS NH3 PVDZ
```

E(total)=-4.12417E+01 E(coul)=-2.66546E+01 E(vdW)=-1.45870E+01 Density= 1.74294

```
;
  _cell_length_a 11.600
  _cell_length_b 4.535
  _cell_length_c 15.516
  _cell_angle_alpha 90.00
  _cell_angle_beta 90.00
  _cell_angle_gamma 90.00
  _cell_formula_units_Z 8
  _symmetry_space_group_name_H-M 'P BCA '
  _symmetry_Int_Tables_number 61
loop_
  _symmetry_equiv_pos_as_xyz
  1 x,y,z
  2 1/2-x,1/2+y,z
  3 x,1/2-y,1/2+z
  4 1/2-x,-y,1/2+z
  5 -x,-y,-z
  6 1/2+x,1/2-y,-z
  7 -x,1/2+y,1/2-z
  8 1/2+x,y,1/2-z
loop_
  _atom_site_label
  _atom_site_fract_x
```

```

_atom_site_fract_y
_atom_site_fract_z
C1    -0.37350 -0.35730  0.67203      # 1
N2    -0.41566 -0.10173  0.63669      # 2
H*3   -0.42208 -0.08486  0.57207      # 3
H*4   -0.47221  0.01597  0.67256      # 4
N'5   -0.38900 -0.42317  0.75147      # 5
H*6   -0.34780 -0.61525  0.76609      # 6
H7    -0.32371 -0.49097  0.62587      # 7
#XC1  -0.41133 -0.21571  0.67915      # 8
#XN2  -0.42949 -0.08069  0.63458      # 9
#XH*3 -0.42345 -0.08419  0.59472      # 10
#XH*4 -0.45653 -0.00681  0.65216      # 11
#XN'5 -0.40275 -0.36027  0.74594      # 12
#XH*6 -0.34618 -0.63305  0.77347      # 13
#XH7  -0.30354 -0.53740  0.62064      # 14
N1+   0.62970  0.02786 -0.06402      # 15
O2+   0.65779  0.23527 -0.02084      # 16
O3+   0.57870 -0.19619 -0.04435      # 17
O4+   0.66183  0.05223 -0.15147      # 18
H*5+  0.63320 -0.13017 -0.17685      # 19
#XN1+  0.62269  0.03747 -0.03533      # 20
#XO2+  0.67299  0.24565 -0.06296      # 21
#XO3+  0.60077 -0.15492 -0.08866      # 22
#XO4+  0.64263 -0.00656 -0.12766      # 23
#XH*5+ 0.63601 -0.11284 -0.17472      # 24
#XLP1+ 0.61048  0.03678 -0.05621      # 25
#XLP1- 0.63869 -0.00019 -0.05129      # 26
#XLP2+ 0.62634  0.15919 -0.01866      # 27
#XLP2- 0.64994  0.12827 -0.01455      # 28
#XLP3+ 0.61268 -0.16934 -0.02459      # 29
#XLP3- 0.55989 -0.10015 -0.03378      # 30
#XLP4+ 0.62372  0.09224 -0.17230      # 31
#XLP4- 0.70363 -0.01247 -0.15839      # 32
#END

```

data\_F\_HNO3\_4

\_chemical\_name\_systematic  
;RAS NH3 PVDZ

E(total)=-4.12337E+01 E(coul)=-2.68194E+01 E(vdW)=-1.44143E+01 Density= 1.69555  
;

```

_cell_length_a  6.766
_cell_length_b  9.326
_cell_length_c  7.783
_cell_angle_alpha  90.00
_cell_angle_beta  121.33
_cell_angle_gamma  90.00
_cell_formula_units_Z  4
_symmetry_space_group_name_H-M 'C C '
_symmetry_Int_Tables_number  9
loop_

```

```

_symmetry_equiv_pos_as_xyz
  1 x,y,z
  2 x,-y,1/2+z
  3 1/2+x,1/2+y,z
  4 1/2+x,1/2-y,1/2+z
loop_
_atom_site_label
_atom_site_fract_x
_atom_site_fract_y
_atom_site_fract_z
C1      -0.19509  0.17792  0.38117      # 1
N2      -0.17816  0.32436  0.40082      # 2
H*3     -0.21693  0.38496  0.27995      # 3
H*4     -0.20345  0.36859  0.50667      # 4
N'5     -0.20485  0.09741  0.50990      # 5
H*6     -0.20833 -0.00783  0.47310      # 6
H7      -0.19318  0.13895  0.24839      # 7
#XC1    -0.19515  0.24497  0.44224      # 8
#XN2    -0.19348  0.34080  0.40257      # 9
#XH*3   -0.20661  0.36800  0.32425      # 10
#XH*4   -0.19805  0.36836  0.46054      # 11
#XN'5   -0.20454  0.13258  0.52047      # 12
#XH*6   -0.20901 -0.02127  0.48115      # 13
#XH7    -0.18190  0.11549  0.22377      # 14
N1+     0.29821  0.17522  0.37167      # 15
O2+     0.32186  0.13998  0.52959      # 16
O3+     0.24388  0.10504  0.22198      # 17
O4+     0.34113  0.32210  0.36108      # 18
H*5+    0.31486  0.33252  0.22617      # 19
#XN1+   0.28772  0.13002  0.38740      # 20
#XO2+   0.34226  0.21050  0.52354      # 21
#XO3+   0.27154  0.18438  0.23673      # 22
#XO4+   0.31878  0.27324  0.32767      # 23
#XH*5+  0.31748  0.33199  0.23890      # 24
#XLP1+  0.26050  0.16094  0.35829      # 25
#XLP1-  0.32309  0.15272  0.37821      # 26
#XLP2+  0.27513  0.12096  0.45890      # 27
#XLP2-  0.32750  0.11408  0.47557      # 28
#XLP3+  0.30843  0.08304  0.28815      # 29
#XLP3-  0.19129  0.09842  0.25086      # 30
#XLP4+  0.25598  0.35428  0.31990      # 31
#XLP4-  0.43328  0.33101  0.37634      # 32
#END

```

```

data_F_HNO3_5
_chemical_name_systematic
;RAS NH3 PVDZ

```

E(total)=-4.12110E+01 E(coul)=-2.75283E+01 E(vdW)=-1.36827E+01 Density= 1.66741

;

```

_cell_length_a  7.687
_cell_length_b  7.671

```

```

_cell_length_c 9.417
_cell_angle_alpha 90.00
_cell_angle_beta 50.20
_cell_angle_gamma 90.00
_cell_formula_units_Z 4
_symmetry_space_group_name_H-M 'P 21/A '
_symmetry_Int_Tables_number 14
loop_
_symmetry_equiv_pos_as_xyz
  1 x,y,z
  2 1/2-x,1/2+y,-z
  3 -x,-y,-z
  4 1/2+x,1/2-y,z
loop_
_atom_site_label
_atom_site_fract_x
_atom_site_fract_y
_atom_site_fract_z
C1 0.22057 -0.22823 0.69199 # 1
N2 0.20480 -0.21633 0.84529 # 2
H*3 0.22936 -0.32407 0.89182 # 3
H*4 0.24383 -0.10010 0.86955 # 4
N'5 0.24710 -0.09366 0.59933 # 5
H*6 0.24665 -0.12846 0.49513 # 6
H7 0.20226 -0.36270 0.66205 # 7
#XC1 0.22789 -0.16717 0.75498 # 8
#XN2 0.22072 -0.20881 0.85334 # 9
#XH*3 0.22434 -0.28314 0.87791 # 10
#XH*4 0.23250 -0.14877 0.87489 # 11
#XN'5 0.24792 -0.08344 0.63380 # 12
#XH*6 0.24843 -0.11994 0.48095 # 13
#XH7 0.18768 -0.39169 0.64622 # 14
N1+ 0.21576 0.76387 0.18978 # 15
O2+ 0.24020 0.91251 0.14037 # 16
O3+ 0.18104 0.63340 0.13813 # 17
O4+ 0.23023 0.73935 0.33047 # 18
H*5+ 0.20716 0.61435 0.35397 # 19
#XN1+ 0.21354 0.78287 0.14522 # 20
#XO2+ 0.24698 0.89985 0.20802 # 21
#XO3+ 0.19254 0.63897 0.21207 # 22
#XO4+ 0.21878 0.71358 0.28739 # 23
#XH*5+ 0.20939 0.62610 0.35218 # 24
#XLP1+ 0.24443 0.75893 0.15466 # 25
#XLP1- 0.18176 0.76623 0.19061 # 26
#XLP2+ 0.25270 0.85442 0.11026 # 27
#XLP2- 0.20028 0.86053 0.14033 # 28
#XLP3+ 0.12935 0.68534 0.15338 # 29
#XLP3- 0.24662 0.67168 0.08610 # 30
#XLP4+ 0.31895 0.71504 0.30039 # 31
#XLP4- 0.14144 0.73572 0.40223 # 32
#END

```

**S11.** Optimized crystal structure coordinates for azidoformamidine – nitric acid (cocrystal form).

```
data_N3F_HNO3_1
_chemical_name_systematic
;RAS NH3 PVDZ
```

```
E(total)=-3.82087E+01 E(coul)=-2.39342E+01 E(vdW)=-1.42745E+01 Density= 1.66378
;
```

```
_cell_length_a 4.828
_cell_length_b 9.041
_cell_length_c 14.227
_cell_angle_alpha 90.00
_cell_angle_beta 107.81
_cell_angle_gamma 90.00
_cell_formula_units_Z 4
_symmetry_space_group_name_H-M 'P 21/C '
_symmetry_Int_Tables_number 14
```

```
loop_
_symmetry_equiv_pos_as_xyz
```

```
1 x,y,z
2 -x,1/2+y,1/2-z
3 -x,-y,-z
4 x,1/2-y,1/2+z
```

```
loop_
```

```
_atom_site_label
_atom_site_fract_x
_atom_site_fract_y
_atom_site_fract_z
C1 0.24458 0.43811 -0.10780 # 1
N'2 0.41143 0.42310 -0.16187 # 2
H*3 0.49497 0.31881 -0.15751 # 3
N4 0.16294 0.33462 -0.05017 # 4
N'5 0.10303 0.57507 -0.10284 # 5
N6 0.15387 0.67491 -0.15568 # 6
N'7 0.18308 0.77419 -0.20021 # 7
H*8 0.28505 0.24219 -0.03266 # 8
H*9 0.07197 0.37154 0.00067 # 9
#XC1 0.20896 0.43215 -0.09228 # 10
#XN'2 0.40300 0.44569 -0.17149 # 11
#XH*3 0.50319 0.32510 -0.16174 # 12
#XN4 0.20082 0.35360 -0.04620 # 13
#XN'5 0.08972 0.56868 -0.09250 # 14
#XN6 0.16036 0.66329 -0.15496 # 15
#XN'7 0.16318 0.78416 -0.19258 # 16
#XH*8 0.28365 0.24466 -0.03054 # 17
#XH*9 0.06364 0.37180 0.00505 # 18
#XLP1+ 0.25844 0.46923 -0.10264 # 19
#XLP1- 0.20355 0.43879 -0.11296 # 20
#XLP2+ 0.40179 0.40723 -0.14513 # 21
#XLP2- 0.41509 0.43665 -0.16244 # 22
#XLP4+ 0.27356 0.34348 -0.01076 # 23
#XLP4- 0.06084 0.30378 -0.07473 # 24
```

|        |         |         |          |      |
|--------|---------|---------|----------|------|
| #XLP5+ | 0.15413 | 0.58542 | -0.06812 | # 25 |
| #XLP5- | 0.00869 | 0.55703 | -0.11279 | # 26 |
| #XLP6+ | 0.13877 | 0.67270 | -0.15352 | # 27 |
| #XLP6- | 0.14835 | 0.67662 | -0.14780 | # 28 |
| #XLP7+ | 0.24363 | 0.80857 | -0.18384 | # 29 |
| #XLP7- | 0.10914 | 0.78491 | -0.22778 | # 30 |
| N1+    | 0.35607 | 0.54349 | 0.59740  | # 31 |
| O2+    | 0.37441 | 0.62581 | 0.53341  | # 32 |
| O3+    | 0.23036 | 0.42597 | 0.59217  | # 33 |
| O4+    | 0.50599 | 0.59309 | 0.69359  | # 34 |
| H*5+   | 0.46974 | 0.51527 | 0.73574  | # 35 |
| #XN1+  | 0.31429 | 0.53579 | 0.56451  | # 36 |
| #XO2+  | 0.44604 | 0.64903 | 0.57984  | # 37 |
| #XO3+  | 0.31849 | 0.46517 | 0.63874  | # 38 |
| #XO4+  | 0.44321 | 0.55420 | 0.67132  | # 39 |
| #XH*5+ | 0.47363 | 0.52278 | 0.73205  | # 40 |
| #XLP1+ | 0.36923 | 0.52445 | 0.58604  | # 41 |
| #XLP1- | 0.30205 | 0.54436 | 0.58716  | # 42 |
| #XLP2+ | 0.35722 | 0.57110 | 0.53507  | # 43 |
| #XLP2- | 0.30102 | 0.58776 | 0.53601  | # 44 |
| #XLP3+ | 0.16914 | 0.46795 | 0.57160  | # 45 |
| #XLP3- | 0.29486 | 0.43070 | 0.56951  | # 46 |
| #XLP4+ | 0.61809 | 0.56487 | 0.70848  | # 47 |
| #XLP4- | 0.42780 | 0.62126 | 0.71166  | # 48 |
| #END   |         |         |          |      |

data\_N3F\_HNO3\_2  
 \_chemical\_name\_systematic  
 ;RAS NH3 PVDZ

E(total)=-3.81507E+01 E(coul)=-2.39011E+01 E(vdW)=-1.42496E+01 Density= 1.68659

;  
 \_cell\_length\_a 8.357  
 \_cell\_length\_b 7.673  
 \_cell\_length\_c 9.198  
 \_cell\_angle\_alpha 90.00  
 \_cell\_angle\_beta 81.45  
 \_cell\_angle\_gamma 90.00  
 \_cell\_formula\_units\_Z 4  
 \_symmetry\_space\_group\_name\_H-M 'P 21/C '  
 \_symmetry\_Int\_Tables\_number 14  
 loop\_  
 \_symmetry\_equiv\_pos\_as\_xyz  
 1 x,y,z  
 2 -x,1/2+y,1/2-z  
 3 -x,-y,-z  
 4 x,1/2-y,1/2+z  
 loop\_  
 \_atom\_site\_label  
 \_atom\_site\_fract\_x  
 \_atom\_site\_fract\_y  
 \_atom\_site\_fract\_z

|        |          |          |          |      |
|--------|----------|----------|----------|------|
| C1     | 0.68570  | 0.07536  | 0.80241  | # 1  |
| N'2    | 0.80508  | 0.12779  | 0.70915  | # 2  |
| H*3    | 0.85302  | 0.02945  | 0.64177  | # 3  |
| N4     | 0.61572  | -0.08755 | 0.81840  | # 4  |
| N'5    | 0.59983  | 0.19146  | 0.90739  | # 5  |
| N6     | 0.64995  | 0.34461  | 0.89830  | # 6  |
| N'7    | 0.68410  | 0.48720  | 0.90135  | # 7  |
| H*8    | 0.68067  | -0.18848 | 0.77038  | # 8  |
| H*9    | 0.54166  | -0.11364 | 0.91311  | # 9  |
| #XC1   | 0.65869  | 0.05126  | 0.82158  | # 10 |
| #XN'2  | 0.80385  | 0.15917  | 0.71207  | # 11 |
| #XH*3  | 0.85947  | 0.04027  | 0.63956  | # 12 |
| #XN4   | 0.63599  | -0.07326 | 0.83092  | # 13 |
| #XN'5  | 0.58793  | 0.17350  | 0.91759  | # 14 |
| #XN6   | 0.65355  | 0.33329  | 0.89138  | # 15 |
| #XN'7  | 0.66929  | 0.48715  | 0.91895  | # 16 |
| #XH*8  | 0.67898  | -0.18862 | 0.77464  | # 17 |
| #XH*9  | 0.53502  | -0.11861 | 0.91954  | # 18 |
| #XLP1+ | 0.69137  | 0.09872  | 0.82636  | # 19 |
| #XLP1- | 0.66389  | 0.08045  | 0.80081  | # 20 |
| #XLP2+ | 0.79280  | 0.09402  | 0.72102  | # 21 |
| #XLP2- | 0.80730  | 0.14105  | 0.71638  | # 22 |
| #XLP4+ | 0.66405  | -0.12007 | 0.86062  | # 23 |
| #XLP4- | 0.56654  | -0.09171 | 0.78006  | # 24 |
| #XLP5+ | 0.61536  | 0.16363  | 0.95104  | # 25 |
| #XLP5- | 0.54909  | 0.18292  | 0.89405  | # 26 |
| #XLP6+ | 0.64029  | 0.33964  | 0.90120  | # 27 |
| #XLP6- | 0.64351  | 0.33714  | 0.90962  | # 28 |
| #XLP7+ | 0.71236  | 0.50247  | 0.93617  | # 29 |
| #XLP7- | 0.65212  | 0.52565  | 0.88183  | # 30 |
| N1+    | -0.09883 | 0.79415  | 0.03141  | # 31 |
| O2+    | -0.21649 | 0.86667  | 0.09404  | # 32 |
| O3+    | -0.02497 | 0.66911  | 0.06786  | # 33 |
| O4+    | -0.03840 | 0.86782  | -0.10645 | # 34 |
| H*5+   | 0.05496  | 0.79516  | -0.14175 | # 35 |
| #XN1+  | -0.12571 | 0.77871  | 0.07622  | # 36 |
| #XO2+  | -0.18683 | 0.90148  | 0.02767  | # 37 |
| #XO3+  | -0.00592 | 0.72079  | -0.00271 | # 38 |
| #XO4+  | -0.03399 | 0.82187  | -0.06761 | # 39 |
| #XH*5+ | 0.04631  | 0.80227  | -0.13883 | # 40 |
| #XLP1+ | -0.11655 | 0.76724  | 0.03867  | # 41 |
| #XLP1- | -0.08995 | 0.79710  | 0.05688  | # 42 |
| #XLP2+ | -0.19438 | 0.80578  | 0.09534  | # 43 |
| #XLP2- | -0.17213 | 0.83075  | 0.11058  | # 44 |
| #XLP3+ | -0.03685 | 0.71686  | 0.10718  | # 45 |
| #XLP3- | -0.08661 | 0.66099  | 0.07310  | # 46 |
| #XLP4+ | -0.05999 | 0.82918  | -0.15371 | # 47 |
| #XLP4- | 0.01534  | 0.91374  | -0.10212 | # 48 |
| #END   |          |          |          |      |

data\_N3F\_HNO3\_3  
\_chemical\_name\_systematic



;RAS NH3 PVDZ

E(total)=-3.80605E+01 E(coul)=-2.30710E+01 E(vdW)=-1.49895E+01 Density= 1.68734

;

\_cell\_length\_a 4.897  
\_cell\_length\_b 10.651  
\_cell\_length\_c 5.635  
\_cell\_angle\_alpha 94.16  
\_cell\_angle\_beta 92.98  
\_cell\_angle\_gamma 95.08  
\_cell\_formula\_units\_Z 2  
\_symmetry\_space\_group\_name\_H-M 'P -1 ' ' '  
\_symmetry\_Int\_Tables\_number 2

loop\_

\_symmetry\_equiv\_pos\_as\_xyz

1 x,y,z  
2 -x,-y,-z

loop\_

\_atom\_site\_label

\_atom\_site\_fract\_x

\_atom\_site\_fract\_y

\_atom\_site\_fract\_z

|        |         |          |          |      |
|--------|---------|----------|----------|------|
| C1     | 0.87855 | -0.19270 | 0.30493  | # 1  |
| N'2    | 0.86553 | -0.30568 | 0.20790  | # 2  |
| H*3    | 0.72013 | -0.36392 | 0.27905  | # 3  |
| N4     | 0.72255 | -0.14289 | 0.47892  | # 4  |
| N'5    | 1.06751 | -0.09512 | 0.23231  | # 5  |
| N6     | 1.21173 | -0.12953 | 0.06820  | # 6  |
| N'7    | 1.35436 | -0.14898 | -0.07917 | # 7  |
| H*8    | 0.61707 | -0.20452 | 0.57594  | # 8  |
| H*9    | 0.79188 | -0.05829 | 0.56367  | # 9  |
| #XC1   | 0.86887 | -0.16802 | 0.33916  | # 10 |
| #XN'2  | 0.89394 | -0.30345 | 0.17424  | # 11 |
| #XH*3  | 0.73007 | -0.36884 | 0.26715  | # 12 |
| #XN4   | 0.76780 | -0.15091 | 0.48083  | # 13 |
| #XN'5  | 1.06009 | -0.08363 | 0.25727  | # 14 |
| #XN6   | 1.19485 | -0.13467 | 0.07642  | # 15 |
| #XN'7  | 1.37027 | -0.13255 | -0.06928 | # 16 |
| #XH*8  | 0.62221 | -0.20176 | 0.57916  | # 17 |
| #XH*9  | 0.79287 | -0.05154 | 0.57247  | # 18 |
| #XLP1+ | 0.93771 | -0.18675 | 0.30110  | # 19 |
| #XLP1- | 0.86414 | -0.17923 | 0.28983  | # 20 |
| #XLP2+ | 0.84786 | -0.29345 | 0.25218  | # 21 |
| #XLP2- | 0.88867 | -0.30416 | 0.19986  | # 22 |
| #XLP4+ | 0.79655 | -0.15780 | 0.57002  | # 23 |
| #XLP4- | 0.62476 | -0.12625 | 0.43264  | # 24 |
| #XLP5+ | 1.12336 | -0.08830 | 0.30741  | # 25 |
| #XLP5- | 1.00319 | -0.06773 | 0.21207  | # 26 |
| #XLP6+ | 1.20512 | -0.12222 | 0.07285  | # 27 |
| #XLP6- | 1.21833 | -0.12101 | 0.08416  | # 28 |
| #XLP7+ | 1.44025 | -0.15341 | -0.05619 | # 29 |
| #XLP7- | 1.33163 | -0.13566 | -0.15147 | # 30 |

|        |         |         |         |      |
|--------|---------|---------|---------|------|
| N1+    | 1.22920 | 0.44654 | 0.27051 | # 31 |
| O2+    | 1.41360 | 0.38820 | 0.33700 | # 32 |
| O3+    | 0.98233 | 0.42028 | 0.26438 | # 33 |
| O4+    | 1.31739 | 0.56422 | 0.18668 | # 34 |
| H*5+   | 1.14616 | 0.59856 | 0.14069 | # 35 |
| #XN1+  | 1.21855 | 0.40790 | 0.30003 | # 36 |
| #XO2+  | 1.45467 | 0.44489 | 0.29647 | # 37 |
| #XO3+  | 1.05705 | 0.47988 | 0.22521 | # 38 |
| #XO4+  | 1.23920 | 0.53223 | 0.20355 | # 39 |
| #XH*5+ | 1.16263 | 0.59568 | 0.14478 | # 40 |
| #XLP1+ | 1.21090 | 0.44050 | 0.31048 | # 41 |
| #XLP1- | 1.21285 | 0.42493 | 0.24871 | # 42 |
| #XLP2+ | 1.31466 | 0.38911 | 0.35656 | # 43 |
| #XLP2- | 1.31629 | 0.37608 | 0.30489 | # 44 |
| #XLP3+ | 1.03707 | 0.38524 | 0.22863 | # 45 |
| #XLP3- | 1.03342 | 0.41438 | 0.34422 | # 46 |
| #XLP4+ | 1.31178 | 0.60496 | 0.25901 | # 47 |
| #XLP4- | 1.31730 | 0.56085 | 0.08405 | # 48 |
| #END   |         |         |         |      |

data\_N3F\_HNO3\_4  
 \_chemical\_name\_systematic  
 ;RAS NH3 PVDZ

E(total)=-3.78296E+01 E(coul)=-2.42777E+01 E(vdW)=-1.35519E+01 Density= 1.64292

```

;
_cell_length_a 15.319
_cell_length_b 11.173
_cell_length_c 3.627
_cell_angle_alpha 90.00
_cell_angle_beta 74.70
_cell_angle_gamma 90.00
_cell_formula_units_Z 4
_symmetry_space_group_name_H-M 'P 21/A '
_symmetry_Int_Tables_number 14
loop_
_symmetry_equiv_pos_as_xyz
  1 x,y,z
  2 1/2-x,1/2+y,-z
  3 -x,-y,-z
  4 1/2+x,1/2-y,z
loop_
_atom_site_label
_atom_site_fract_x
_atom_site_fract_y
_atom_site_fract_z
C1      0.65110  1.00722  0.71382      # 1
N'2     0.73294  0.99578  0.51235      # 2
H*3     0.75676  1.07268  0.36937      # 3
N4      0.59576  1.10651  0.76554      # 4
N'5     0.60421  0.91075  0.93895      # 5
N6      0.64984  0.81766  0.92371      # 6

```

|        |         |          |         |      |
|--------|---------|----------|---------|------|
| N*7    | 0.68399 | 0.72829  | 0.93335 | # 7  |
| H*8    | 0.61371 | 1.17350  | 0.57390 | # 8  |
| H*9    | 0.52867 | 1.09405  | 0.87911 | # 9  |
| #XC1   | 0.63112 | 1.01767  | 0.75255 | # 10 |
| #XN'2  | 0.73739 | 0.97672  | 0.53355 | # 11 |
| #XH*3  | 0.76139 | 1.06625  | 0.36231 | # 12 |
| #XN4   | 0.59719 | 1.08928  | 0.72281 | # 13 |
| #XN'5  | 0.59313 | 0.91882  | 0.95071 | # 14 |
| #XN6   | 0.65175 | 0.82650  | 0.91129 | # 15 |
| #XN'7  | 0.67223 | 0.72341  | 0.95984 | # 16 |
| #XH*8  | 0.61126 | 1.17206  | 0.57591 | # 17 |
| #XH*9  | 0.52313 | 1.09533  | 0.88852 | # 18 |
| #XLP1+ | 0.64553 | 0.98247  | 0.70540 | # 19 |
| #XLP1- | 0.64790 | 1.00890  | 0.76761 | # 20 |
| #XLP2+ | 0.71790 | 1.01229  | 0.51438 | # 21 |
| #XLP2- | 0.73259 | 0.98466  | 0.51252 | # 22 |
| #XLP4+ | 0.58027 | 1.09836  | 0.61688 | # 23 |
| #XLP4- | 0.60204 | 1.13422  | 0.89160 | # 24 |
| #XLP5+ | 0.58149 | 0.90518  | 0.86771 | # 25 |
| #XLP5- | 0.59736 | 0.93051  | 1.05537 | # 26 |
| #XLP6+ | 0.64529 | 0.82101  | 0.94150 | # 27 |
| #XLP6- | 0.64152 | 0.81825  | 0.92905 | # 28 |
| #XLP7+ | 0.67680 | 0.69946  | 0.86358 | # 29 |
| #XLP7- | 0.69354 | 0.72033  | 1.03876 | # 30 |
| N1+    | 0.06693 | -0.88297 | 0.29080 | # 31 |
| O2+    | 0.00757 | -0.81220 | 0.29837 | # 32 |
| O3+    | 0.07871 | -0.98311 | 0.15642 | # 33 |
| O4+    | 0.13298 | -0.84160 | 0.46775 | # 34 |
| H*5+   | 0.17524 | -0.90834 | 0.43711 | # 35 |
| #XN1+  | 0.04311 | -0.88923 | 0.24035 | # 36 |
| #XO2+  | 0.03955 | -0.79284 | 0.38301 | # 37 |
| #XO3+  | 0.10865 | -0.95013 | 0.25860 | # 38 |
| #XO4+  | 0.12135 | -0.87454 | 0.39700 | # 39 |
| #XH*5+ | 0.17145 | -0.90190 | 0.44056 | # 40 |
| #XLP1+ | 0.06669 | -0.88422 | 0.22032 | # 41 |
| #XLP1- | 0.05329 | -0.89702 | 0.31391 | # 42 |
| #XLP2+ | 0.02099 | -0.84641 | 0.21156 | # 43 |
| #XLP2- | 0.00978 | -0.85711 | 0.28985 | # 44 |
| #XLP3+ | 0.04672 | -0.97497 | 0.24172 | # 45 |
| #XLP3- | 0.07179 | -0.95103 | 0.06658 | # 46 |
| #XLP4+ | 0.16441 | -0.82366 | 0.35626 | # 47 |
| #XLP4- | 0.12646 | -0.85989 | 0.62134 | # 48 |
| #END   |         |          |         |      |

data\_N3F\_HNO3\_5  
 \_chemical\_name\_systematic  
 ;RAS NH3 PVDZ

E(total)=-3.78042E+01 E(coul)=-2.25145E+01 E(vdW)=-1.52898E+01 Density= 1.72432

;

\_cell\_length\_a 9.204  
 \_cell\_length\_b 6.892

```

_cell_length_c 9.620
_cell_angle_alpha 90.00
_cell_angle_beta 69.23
_cell_angle_gamma 90.00
_cell_formula_units_Z 4
_symmetry_space_group_name_H-M 'P 21/A '
_symmetry_Int_Tables_number 14
loop_
_symmetry_equiv_pos_as_xyz
  1 x,y,z
  2 1/2-x,1/2+y,-z
  3 -x,-y,-z
  4 1/2+x,1/2-y,z
loop_
_atom_site_label
_atom_site_fract_x
_atom_site_fract_y
_atom_site_fract_z
C1 0.58172 0.58789 0.68649 # 1
N'2 0.58903 0.63780 0.81201 # 2
H*3 0.63517 0.53055 0.85663 # 3
N4 0.63034 0.41843 0.60745 # 4
N'5 0.52139 0.71605 0.60378 # 5
N6 0.47958 0.87720 0.66332 # 6
N'7 0.43757 1.02780 0.70580 # 7
H*8 0.64893 0.30293 0.66343 # 8
H*9 0.59117 0.38967 0.52385 # 9
#XC1 0.58344 0.56339 0.65731 # 10
#XN'2 0.58294 0.67211 0.81330 # 11
#XH*3 0.63192 0.54166 0.86365 # 12
#XN4 0.60488 0.42908 0.62440 # 13
#XN'5 0.52152 0.69696 0.58995 # 14
#XN6 0.48527 0.86506 0.66663 # 15
#XN'7 0.43029 1.02791 0.68979 # 16
#XH*8 0.64605 0.30250 0.66120 # 17
#XH*9 0.58990 0.38448 0.51647 # 18
#XLP1+ 0.55329 0.60945 0.68949 # 19
#XLP1- 0.59553 0.59735 0.66810 # 20
#XLP2+ 0.58994 0.60117 0.79612 # 21
#XLP2- 0.57933 0.65104 0.81393 # 22
#XLP4+ 0.56710 0.36901 0.63964 # 23
#XLP4- 0.69539 0.42715 0.57050 # 24
#XLP5+ 0.47578 0.67710 0.60738 # 25
#XLP5- 0.56503 0.71693 0.56078 # 26
#XLP6+ 0.48335 0.87297 0.65390 # 27
#XLP6- 0.47404 0.86857 0.65504 # 28
#XLP7+ 0.38676 1.03526 0.72602 # 29
#XLP7- 0.46947 1.07800 0.68461 # 30
N1+ -0.20888 0.60837 0.12394 # 31
O2+ -0.26211 0.57589 0.25492 # 32
O3+ -0.24410 0.54372 0.02273 # 33
O4+ -0.08579 0.74371 0.08316 # 34

```

|        |          |         |          |      |
|--------|----------|---------|----------|------|
| H*5+   | -0.05659 | 0.75333 | -0.02438 | # 35 |
| #XN1+  | -0.24867 | 0.56672 | 0.14622  | # 36 |
| #XO2+  | -0.20287 | 0.64086 | 0.23459  | # 37 |
| #XO3+  | -0.18073 | 0.61682 | 0.01667  | # 38 |
| #XO4+  | -0.12110 | 0.69869 | 0.06792  | # 39 |
| #XH*5+ | -0.05897 | 0.75284 | -0.01433 | # 40 |
| #XLP1+ | -0.23787 | 0.61173 | 0.12781  | # 41 |
| #XLP1- | -0.20928 | 0.57112 | 0.12289  | # 42 |
| #XLP2+ | -0.28314 | 0.57218 | 0.21331  | # 43 |
| #XLP2- | -0.25922 | 0.53821 | 0.20920  | # 44 |
| #XLP3+ | -0.23643 | 0.49253 | 0.05837  | # 45 |
| #XLP3- | -0.28993 | 0.56853 | 0.06757  | # 46 |
| #XLP4+ | -0.10731 | 0.82016 | 0.07546  | # 47 |
| #XLP4- | -0.02633 | 0.70512 | 0.06154  | # 48 |
| #END   |          |         |          |      |

**S12.** Optimized crystal structure coordinates for guanidine – nitric acid (cocrystal form).

data\_G\_HNO3\_1

\_chemical\_name\_systematic

;RAS NH3 PVDZ

E(total)=-4.82115E+01 E(coul)=-3.23389E+01 E(vdW)=-1.58725E+01 Density= 1.73117

;

\_cell\_length\_a 7.294

\_cell\_length\_b 14.783

\_cell\_length\_c 4.350

\_cell\_angle\_alpha 90.00

\_cell\_angle\_beta 87.29

\_cell\_angle\_gamma 90.00

\_cell\_formula\_units\_Z 4

\_symmetry\_space\_group\_name\_H-M 'P 21/A '

\_symmetry\_Int\_Tables\_number 14

loop\_

\_symmetry\_equiv\_pos\_as\_xyz

1 x,y,z

2 1/2-x,1/2+y,-z

3 -x,-y,-z

4 1/2+x,1/2-y,z

loop\_

\_atom\_site\_label

\_atom\_site\_fract\_x

\_atom\_site\_fract\_y

\_atom\_site\_fract\_z

|    |         |          |          |     |
|----|---------|----------|----------|-----|
| C1 | 0.71173 | -0.34287 | -0.22440 | # 1 |
|----|---------|----------|----------|-----|

|     |         |          |         |     |
|-----|---------|----------|---------|-----|
| N'2 | 0.61954 | -0.30664 | 0.00249 | # 2 |
|-----|---------|----------|---------|-----|

|     |         |          |         |     |
|-----|---------|----------|---------|-----|
| H*3 | 0.69910 | -0.26387 | 0.12323 | # 3 |
|-----|---------|----------|---------|-----|

|    |         |          |          |     |
|----|---------|----------|----------|-----|
| N4 | 0.63398 | -0.41098 | -0.39765 | # 4 |
|----|---------|----------|----------|-----|

|     |         |          |          |     |
|-----|---------|----------|----------|-----|
| H*5 | 0.66320 | -0.40730 | -0.62744 | # 5 |
|-----|---------|----------|----------|-----|

|     |         |          |          |     |
|-----|---------|----------|----------|-----|
| H*6 | 0.49825 | -0.41885 | -0.34373 | # 6 |
|-----|---------|----------|----------|-----|

|    |         |          |          |     |
|----|---------|----------|----------|-----|
| N7 | 0.89061 | -0.32159 | -0.33045 | # 7 |
|----|---------|----------|----------|-----|

|     |         |          |          |     |
|-----|---------|----------|----------|-----|
| H*8 | 0.95972 | -0.28146 | -0.18732 | # 8 |
|-----|---------|----------|----------|-----|

|        |         |          |          |      |
|--------|---------|----------|----------|------|
| H*9    | 0.96640 | -0.37470 | -0.41143 | # 9  |
| #XC1   | 0.71294 | -0.35395 | -0.27884 | # 10 |
| #XN'2  | 0.60105 | -0.31067 | -0.00234 | # 11 |
| #XH*3  | 0.67865 | -0.26422 | 0.13632  | # 12 |
| #XN4   | 0.63555 | -0.40487 | -0.42044 | # 13 |
| #XH*5  | 0.65466 | -0.40766 | -0.63126 | # 14 |
| #XH*6  | 0.50955 | -0.41659 | -0.34829 | # 15 |
| #XN7   | 0.88386 | -0.32874 | -0.32028 | # 16 |
| #XH*8  | 0.95962 | -0.28149 | -0.18974 | # 17 |
| #XH*9  | 0.96756 | -0.37050 | -0.40787 | # 18 |
| #XLP1+ | 0.70421 | -0.33153 | -0.25274 | # 19 |
| #XLP1- | 0.70943 | -0.35823 | -0.19980 | # 20 |
| #XLP2+ | 0.59422 | -0.30463 | -0.01967 | # 21 |
| #XLP2- | 0.62753 | -0.31632 | 0.02172  | # 22 |
| #XLP4+ | 0.59299 | -0.38423 | -0.49458 | # 23 |
| #XLP4- | 0.66277 | -0.44359 | -0.36582 | # 24 |
| #XLP7+ | 0.88898 | -0.30593 | -0.42660 | # 25 |
| #XLP7- | 0.91983 | -0.34550 | -0.24130 | # 26 |
| N1+    | 0.20455 | 0.57560  | 0.12597  | # 27 |
| O2+    | 0.05942 | 0.55389  | 0.24501  | # 28 |
| O3+    | 0.28656 | 0.54628  | -0.10230 | # 29 |
| O4+    | 0.29179 | 0.64668  | 0.27903  | # 30 |
| H*5+   | 0.40521 | 0.65574  | 0.15541  | # 31 |
| #XN1+  | 0.16773 | 0.55335  | 0.09136  | # 32 |
| #XO2+  | 0.10207 | 0.58804  | 0.31752  | # 33 |
| #XO3+  | 0.31732 | 0.58406  | 0.00091  | # 34 |
| #XO4+  | 0.29228 | 0.62414  | 0.19110  | # 35 |
| #XH*5+ | 0.39475 | 0.65511  | 0.16758  | # 36 |
| #XLP1+ | 0.18553 | 0.57531  | 0.07773  | # 37 |
| #XLP1- | 0.20931 | 0.55838  | 0.12637  | # 38 |
| #XLP2+ | 0.08727 | 0.55202  | 0.13712  | # 39 |
| #XLP2- | 0.10716 | 0.53785  | 0.17781  | # 40 |
| #XLP3+ | 0.26315 | 0.52212  | -0.02509 | # 41 |
| #XLP3- | 0.21865 | 0.55381  | -0.11611 | # 42 |
| #XLP4+ | 0.27949 | 0.68095  | 0.22005  | # 43 |
| #XLP4- | 0.34684 | 0.63297  | 0.35782  | # 44 |
| #END   |         |          |          |      |

data\_G\_HNO3\_2  
 \_chemical\_name\_systematic  
 ;RAS NH3 PVDZ

E(total)=-4.80180E+01 E(coul)=-3.16561E+01 E(vdW)=-1.63619E+01 Density= 1.72579  
 ;

\_cell\_length\_a 14.972  
 \_cell\_length\_b 4.155  
 \_cell\_length\_c 7.564  
 \_cell\_angle\_alpha 90.00  
 \_cell\_angle\_beta 92.87  
 \_cell\_angle\_gamma 90.00  
 \_cell\_formula\_units\_Z 4  
 \_symmetry\_space\_group\_name\_H-M 'P 21/A '

\_symmetry\_Int\_Tables\_number 14

loop\_

\_symmetry\_equiv\_pos\_as\_xyz

- 1 x,y,z
- 2 1/2-x,1/2+y,-z
- 3 -x,-y,-z
- 4 1/2+x,1/2-y,z

loop\_

\_atom\_site\_label

\_atom\_site\_fract\_x

\_atom\_site\_fract\_y

\_atom\_site\_fract\_z

|        |          |          |         |      |
|--------|----------|----------|---------|------|
| C1     | -0.15536 | -0.07925 | 0.20889 | # 1  |
| N'2    | -0.18506 | -0.15167 | 0.05163 | # 2  |
| H*3    | -0.23486 | -0.31908 | 0.05381 | # 3  |
| N4     | -0.08052 | 0.11806  | 0.23448 | # 4  |
| H*5    | -0.08414 | 0.28067  | 0.33376 | # 5  |
| H*6    | -0.06168 | 0.21694  | 0.11970 | # 6  |
| N7     | -0.19042 | -0.17500 | 0.36864 | # 7  |
| H*8    | -0.23698 | -0.35105 | 0.35636 | # 8  |
| H*9    | -0.14446 | -0.21515 | 0.46923 | # 9  |
| #XC1   | -0.14411 | -0.04023 | 0.23220 | # 10 |
| #XN'2  | -0.17949 | -0.12942 | 0.04117 | # 11 |
| #XH*3  | -0.23289 | -0.30795 | 0.03453 | # 12 |
| #XN4   | -0.08635 | 0.13839  | 0.24148 | # 13 |
| #XH*5  | -0.08301 | 0.29300  | 0.32898 | # 14 |
| #XH*6  | -0.06481 | 0.20954  | 0.12875 | # 15 |
| #XN7   | -0.18299 | -0.17960 | 0.36258 | # 16 |
| #XH*8  | -0.23692 | -0.34893 | 0.35713 | # 17 |
| #XH*9  | -0.14869 | -0.21738 | 0.46745 | # 18 |
| #XLP1+ | -0.16544 | -0.04185 | 0.20945 | # 19 |
| #XLP1- | -0.14050 | -0.10473 | 0.20380 | # 20 |
| #XLP2+ | -0.18458 | -0.10454 | 0.04018 | # 21 |
| #XLP2- | -0.17655 | -0.18115 | 0.05401 | # 22 |
| #XLP4+ | -0.10192 | 0.25682  | 0.22925 | # 23 |
| #XLP4- | -0.05165 | 0.04435  | 0.25521 | # 24 |
| #XLP7+ | -0.20446 | -0.08509 | 0.39544 | # 25 |
| #XLP7- | -0.17067 | -0.29305 | 0.36705 | # 26 |
| N1+    | 0.58481  | -0.21229 | 0.27107 | # 27 |
| O2+    | 0.57468  | -0.10024 | 0.41490 | # 28 |
| O3+    | 0.55571  | -0.12542 | 0.12605 | # 29 |
| O4+    | 0.63947  | -0.48915 | 0.27355 | # 30 |
| H*5+   | 0.64077  | -0.54819 | 0.14902 | # 31 |
| #XN1+  | 0.56822  | -0.12341 | 0.28190 | # 32 |
| #XO2+  | 0.60090  | -0.23344 | 0.41519 | # 33 |
| #XO3+  | 0.58563  | -0.26896 | 0.14642 | # 34 |
| #XO4+  | 0.62058  | -0.40790 | 0.23840 | # 35 |
| #XH*5+ | 0.64082  | -0.54346 | 0.16081 | # 36 |
| #XLP1+ | 0.58800  | -0.15299 | 0.26405 | # 37 |
| #XLP1- | 0.56774  | -0.20502 | 0.26865 | # 38 |
| #XLP2+ | 0.57356  | -0.05491 | 0.35313 | # 39 |
| #XLP2- | 0.55661  | -0.09844 | 0.35698 | # 40 |

```

#XLP3+   0.53232 -0.13348  0.17333      # 41
#XLP3-   0.57024 -0.03610  0.16471      # 42
#XLP4+   0.67559 -0.45756  0.25670      # 43
#XLP4-   0.61821 -0.60494  0.26974      # 44
#END

```

```

data_G_HNO3_3
  _chemical_name_systematic
;RAS NH3 PVDZ

```

```

E(total)=-4.78522E+01 E(coul)=-3.15133E+01 E(vdW)=-1.63389E+01 Density= 1.72012
;

```

```

  _cell_length_a  7.572
  _cell_length_b 14.845
  _cell_length_c  4.195
  _cell_angle_alpha  90.00
  _cell_angle_beta   90.00
  _cell_angle_gamma  90.00
  _cell_formula_units_Z 4
  _symmetry_space_group_name_H-M 'P 212121'
  _symmetry_Int_Tables_number 19

```

```

loop_
  _symmetry_equiv_pos_as_xyz

```

```

  1 x,y,z
  2 1/2+x,1/2-y,-z
  3 -x,1/2+y,1/2-z
  4 1/2-x,-y,1/2+z

```

```

loop_

```

```

  _atom_site_label
  _atom_site_fract_x
  _atom_site_fract_y
  _atom_site_fract_z
C1      0.44877  0.40482  0.57766      # 1
N'2     0.29548  0.43599  0.64875      # 2
H*3     0.30385  0.48571  0.81604      # 3
N4      0.46486  0.32970  0.38028      # 4
H*5     0.56499  0.33279  0.22026      # 5
H*6     0.34800  0.31202  0.28069      # 6
N7      0.61273  0.43842  0.67506      # 7
H*8     0.60619  0.48500  0.85068      # 8
H*9     0.70689  0.39116  0.71446      # 9
#XC1    0.47065  0.39337  0.53890      # 10
#XN'2   0.28435  0.43053  0.62644      # 11
#XH*3   0.28436  0.48393  0.80477      # 12
#XN4    0.47269  0.33555  0.36039      # 13
#XH*5   0.56010  0.33172  0.20797      # 14
#XH*6   0.35743  0.31506  0.28819      # 15
#XN7    0.60566  0.43099  0.67934      # 16
#XH*8   0.60696  0.48493  0.84858      # 17
#XH*9   0.70568  0.39543  0.71677      # 18
#XLP1+  0.45080  0.41503  0.54091      # 19
#XLP1-  0.44161  0.38986  0.60242      # 20

```



|        |          |         |         |      |
|--------|----------|---------|---------|------|
| #XLP2+ | 0.28413  | 0.43572 | 0.60194 | # 21 |
| #XLP2- | 0.29663  | 0.42734 | 0.67772 | # 22 |
| #XLP4+ | 0.46293  | 0.35159 | 0.24340 | # 23 |
| #XLP4- | 0.48147  | 0.30030 | 0.45265 | # 24 |
| #XLP7+ | 0.64165  | 0.45250 | 0.58666 | # 25 |
| #XLP7- | 0.60813  | 0.41830 | 0.79140 | # 26 |
| N1+    | -0.03480 | 0.33541 | 0.21041 | # 27 |
| O2+    | -0.17906 | 0.32540 | 0.09746 | # 28 |
| O3+    | 0.10769  | 0.30685 | 0.12394 | # 29 |
| O4+    | -0.03316 | 0.38914 | 0.48799 | # 30 |
| H*5+   | 0.09117  | 0.39047 | 0.54771 | # 31 |
| #XN1+  | -0.04685 | 0.31910 | 0.12126 | # 32 |
| #XO2+  | -0.17737 | 0.35118 | 0.23100 | # 33 |
| #XO3+  | 0.08962  | 0.33626 | 0.26777 | # 34 |
| #XO4+  | 0.00049  | 0.37058 | 0.40667 | # 35 |
| #XH*5+ | 0.07941  | 0.39051 | 0.54292 | # 36 |
| #XLP1+ | -0.02733 | 0.33892 | 0.15194 | # 37 |
| #XLP1- | -0.03390 | 0.31826 | 0.20218 | # 38 |
| #XLP2+ | -0.11733 | 0.32464 | 0.05308 | # 39 |
| #XLP2- | -0.12282 | 0.30735 | 0.09510 | # 40 |
| #XLP3+ | 0.05834  | 0.28314 | 0.13003 | # 41 |
| #XLP3- | 0.07062  | 0.32182 | 0.03601 | # 42 |
| #XLP4+ | -0.01301 | 0.42572 | 0.45908 | # 43 |
| #XLP4- | -0.03159 | 0.36718 | 0.60139 | # 44 |
| #END   |          |         |         |      |

```
data_G_HNO3_4
  _chemical_name_systematic
;RAS NH3 PVDZ
```

```
E(total)=-4.78398E+01 E(coul)=-3.07353E+01 E(vdW)=-1.71045E+01 Density= 1.77176
```

```
;
  _cell_length_a 7.869
  _cell_length_b 9.252
  _cell_length_c 6.287
  _cell_angle_alpha 90.00
  _cell_angle_beta 90.00
  _cell_angle_gamma 90.00
  _cell_formula_units_Z 4
  _symmetry_space_group_name_H-M 'P 212121'
  _symmetry_Int_Tables_number 19
loop_
  _symmetry_equiv_pos_as_xyz
    1 x,y,z
    2 1/2+x,1/2-y,-z
    3 -x,1/2+y,1/2-z
    4 1/2-x,-y,1/2+z
loop_
  _atom_site_label
  _atom_site_fract_x
  _atom_site_fract_y
  _atom_site_fract_z
```

|        |          |          |          |      |
|--------|----------|----------|----------|------|
| C1     | 0.36516  | 0.19216  | -0.27748 | # 1  |
| N'2    | 0.24492  | 0.21021  | -0.14186 | # 2  |
| H*3    | 0.27906  | 0.28183  | -0.02607 | # 3  |
| N4     | 0.35139  | 0.08668  | -0.43488 | # 4  |
| H*5    | 0.39530  | 0.11640  | -0.58000 | # 5  |
| H*6    | 0.23360  | 0.04261  | -0.44009 | # 6  |
| N7     | 0.51751  | 0.26954  | -0.29122 | # 7  |
| H*8    | 0.54206  | 0.33323  | -0.16411 | # 8  |
| H*9    | 0.61981  | 0.21101  | -0.33800 | # 9  |
| #XC1   | 0.37726  | 0.17993  | -0.31673 | # 10 |
| #XN'2  | 0.23161  | 0.20070  | -0.15155 | # 11 |
| #XH*3  | 0.26040  | 0.27606  | -0.02329 | # 12 |
| #XN4   | 0.35141  | 0.09806  | -0.44812 | # 13 |
| #XH*5  | 0.38847  | 0.11440  | -0.58514 | # 14 |
| #XH*6  | 0.24251  | 0.04872  | -0.43928 | # 15 |
| #XN7   | 0.51473  | 0.25651  | -0.28826 | # 16 |
| #XH*8  | 0.54221  | 0.33335  | -0.16578 | # 17 |
| #XH*9  | 0.61816  | 0.21733  | -0.33413 | # 18 |
| #XLP1+ | 0.35492  | 0.21005  | -0.29568 | # 19 |
| #XLP1- | 0.36949  | 0.16648  | -0.26573 | # 20 |
| #XLP2+ | 0.22392  | 0.20981  | -0.16357 | # 21 |
| #XLP2- | 0.25547  | 0.19567  | -0.12921 | # 22 |
| #XLP4+ | 0.30984  | 0.12645  | -0.50478 | # 23 |
| #XLP4- | 0.39152  | 0.04065  | -0.41389 | # 24 |
| #XLP7+ | 0.51607  | 0.30052  | -0.35217 | # 25 |
| #XLP7- | 0.54801  | 0.23225  | -0.22921 | # 26 |
| N1+    | -0.11280 | 0.04749  | 0.64879  | # 27 |
| O2+    | -0.25498 | 0.03144  | 0.58402  | # 28 |
| O3+    | 0.01020  | -0.03142 | 0.63679  | # 29 |
| O4+    | -0.08683 | 0.17986  | 0.75552  | # 30 |
| H*5+   | 0.03240  | 0.17568  | 0.79691  | # 31 |
| #XN1+  | -0.13170 | 0.00801  | 0.61280  | # 32 |
| #XO2+  | -0.24167 | 0.09490  | 0.63551  | # 33 |
| #XO3+  | 0.00631  | 0.04215  | 0.68928  | # 34 |
| #XO4+  | -0.06316 | 0.13209  | 0.72933  | # 35 |
| #XH*5+ | 0.02120  | 0.17649  | 0.79332  | # 36 |
| #XLP1+ | -0.10575 | 0.03917  | 0.61079  | # 37 |
| #XLP1- | -0.11805 | 0.02168  | 0.66245  | # 38 |
| #XLP2+ | -0.19783 | 0.01204  | 0.56222  | # 39 |
| #XLP2- | -0.20812 | -0.00259 | 0.60543  | # 40 |
| #XLP3+ | -0.04452 | -0.05598 | 0.66300  | # 41 |
| #XLP3- | -0.02152 | -0.02325 | 0.56634  | # 42 |
| #XLP4+ | -0.05574 | 0.22198  | 0.70019  | # 43 |
| #XLP4- | -0.09056 | 0.17245  | 0.84650  | # 44 |
| #END   |          |          |          |      |

data\_G\_HNO3\_5  
\_chemical\_name\_systematic  
;RAS NH3 PVDZ

E(total)=-4.75778E+01 E(coul)=-3.08894E+01 E(vdW)=-1.66884E+01 Density= 1.73761  
;

```

_cell_length_a  4.804
_cell_length_b  11.688
_cell_length_c  8.313
_cell_angle_alpha  90.00
_cell_angle_beta  90.00
_cell_angle_gamma  90.00
_cell_formula_units_Z  4
_symmetry_space_group_name_H-M 'P 212121'
_symmetry_Int_Tables_number 19
loop_
_symmetry_equiv_pos_as_xyz
  1 x,y,z
  2 1/2+x,1/2-y,-z
  3 -x,1/2+y,1/2-z
  4 1/2-x,-y,1/2+z
loop_
_atom_site_label
_atom_site_fract_x
_atom_site_fract_y
_atom_site_fract_z
C1      0.85910  0.06932  0.51989      # 1
N'2     0.94735  0.07919  0.66510      # 2
H*3     1.10566  0.02332  0.68804      # 3
N4      0.62320  0.12891  0.46965      # 4
H*5     0.63498  0.16219  0.35726      # 5
H*6     0.55860  0.18640  0.55288      # 6
N7      0.97576  0.00346  0.39659      # 7
H*8     1.12363 -0.05226  0.43356      # 8
H*9     0.83694 -0.03224  0.31966      # 9
#XC1    0.82415  0.07724  0.49409      # 10
#XN'2   0.92922  0.08882  0.67072      # 11
#XH*3   1.09862  0.03116  0.70286      # 12
#XN4    0.64123  0.13430  0.45993      # 13
#XH*5   0.63105  0.16733  0.35938      # 14
#XH*6   0.56880  0.18203  0.54615      # 15
#XN7    0.95249  0.00311  0.40300      # 16
#XH*8   1.12342 -0.05171  0.43255      # 17
#XH*9   0.85008 -0.03254  0.32130      # 18
#XLP1+  0.88980  0.08188  0.51260      # 19
#XLP1-  0.81310  0.06165  0.52937      # 20
#XLP2+  0.94458  0.09744  0.66714      # 21
#XLP2-  0.92148  0.06868  0.66846      # 22
#XLP4+  0.68710  0.17686  0.44985      # 23
#XLP4-  0.53539  0.09933  0.46581      # 24
#XLP7+  1.01876  0.02806  0.35784      # 25
#XLP7-  0.91637 -0.03606  0.41871      # 26
N1+     0.62487  0.30623 -0.15264      # 27
O2+     0.58388  0.39153 -0.07589      # 28
O3+     0.46367  0.24563 -0.22621      # 29
O4+     0.90672  0.27226 -0.15666      # 30
H*5+    0.90373  0.20324 -0.22239      # 31
#XN1+   0.54026  0.32287 -0.14533      # 32

```

|        |         |         |          |      |
|--------|---------|---------|----------|------|
| #XO2+  | 0.71902 | 0.37474 | -0.07828 | # 33 |
| #XO3+  | 0.61942 | 0.23744 | -0.21839 | # 34 |
| #XO4+  | 0.80663 | 0.26523 | -0.17334 | # 35 |
| #XH*5+ | 0.90488 | 0.20967 | -0.21618 | # 36 |
| #XLP1+ | 0.59431 | 0.31702 | -0.17299 | # 37 |
| #XLP1- | 0.58321 | 0.29924 | -0.13592 | # 38 |
| #XLP2+ | 0.53445 | 0.37239 | -0.12199 | # 39 |
| #XLP2- | 0.52517 | 0.35752 | -0.09097 | # 40 |
| #XLP3+ | 0.43379 | 0.25538 | -0.16845 | # 41 |
| #XLP3- | 0.45456 | 0.28866 | -0.23783 | # 42 |
| #XLP4+ | 0.95989 | 0.28699 | -0.21533 | # 43 |
| #XLP4- | 0.92845 | 0.23663 | -0.11031 | # 44 |
| #END   |         |         |          |      |

**S13.** Optimized crystal structure coordinates for nitroformamidine – nitric acid (cocrystal form).

```
data_NO2F_HNO3_1
_chemical_name_systematic
;RAS NH3 PVDZ
```

```
E(total)=-4.28189E+01 E(coul)=-2.29361E+01 E(vdW)=-1.98828E+01 Density= 1.94841
;
```

```
_cell_length_a 11.544
_cell_length_b 8.538
_cell_length_c 4.978
_cell_angle_alpha 142.52
_cell_angle_beta 99.51
_cell_angle_gamma 65.44
_cell_formula_units_Z 2
_symmetry_space_group_name_H-M 'P -1 '
_symmetry_Int_Tables_number 2
loop_
_symmetry_equiv_pos_as_xyz
1 x,y,z
2 -x,-y,-z
loop_
_atom_site_label
_atom_site_fract_x
_atom_site_fract_y
_atom_site_fract_z
C1 0.60097 0.21461 0.43852 # 1
N'2 0.47729 0.29847 0.49691 # 2
N3 0.67303 0.29686 0.41786 # 3
H*4 0.62519 0.44330 0.45207 # 4
H*5 0.77217 0.21279 0.36934 # 5
N6 0.69230 -0.01188 0.37863 # 6
O7 0.81151 -0.08313 0.32333 # 7
O8 0.63795 -0.10211 0.39134 # 8
H*9 0.44939 0.20017 0.49813 # 9
#XC1 0.59226 0.29238 0.44995 # 10
#XN'2 0.47170 0.33105 0.50248 # 11
#XN3 0.68906 0.29220 0.41093 # 12
```

|        |         |          |         |      |
|--------|---------|----------|---------|------|
| #XH*4  | 0.62779 | 0.45763  | 0.45248 | # 13 |
| #XH*5  | 0.75264 | 0.25232  | 0.38124 | # 14 |
| #XN6   | 0.71509 | -0.06001 | 0.36454 | # 15 |
| #XO7   | 0.77476 | -0.09073 | 0.33736 | # 16 |
| #XO8   | 0.67202 | -0.09657 | 0.37817 | # 17 |
| #XH*9  | 0.42586 | 0.22366  | 0.51001 | # 18 |
| N1+    | 0.10769 | 0.58054  | 0.87783 | # 19 |
| O2+    | 0.13799 | 0.66336  | 0.80179 | # 20 |
| O3+    | 0.07975 | 0.68918  | 1.23744 | # 21 |
| O4+    | 0.10456 | 0.31392  | 0.48180 | # 22 |
| H*5+   | 0.07882 | 0.27873  | 0.60139 | # 23 |
| #XN1+  | 0.11102 | 0.66411  | 0.98600 | # 24 |
| #XO2+  | 0.13631 | 0.53524  | 0.61272 | # 25 |
| #XO3+  | 0.08195 | 0.54764  | 1.00098 | # 26 |
| #XO4+  | 0.09858 | 0.39813  | 0.65420 | # 27 |
| #XH*5+ | 0.08124 | 0.28123  | 0.58885 | # 28 |
| #XLP1+ | 0.08913 | 0.63397  | 0.94387 | # 29 |
| #XLP1- | 0.12522 | 0.59275  | 0.92143 | # 30 |
| #XLP2+ | 0.11120 | 0.71362  | 0.94218 | # 31 |
| #XLP2- | 0.14140 | 0.67914  | 0.92341 | # 32 |
| #XLP3+ | 0.12267 | 0.68223  | 1.20384 | # 33 |
| #XLP3- | 0.05512 | 0.75936  | 1.24584 | # 34 |
| #XLP4+ | 0.05082 | 0.33361  | 0.47083 | # 35 |
| #XLP4- | 0.15305 | 0.21686  | 0.40726 | # 36 |
| #END   |         |          |         |      |

```
data_NO2F_HNO3_2
  _chemical_name_systematic
;RAS NH3 PVDZ
```

E(total)=-4.27800E+01 E(coul)=-2.38349E+01 E(vdW)=-1.89451E+01 Density= 1.88555

```
;
  _cell_length_a 6.225
  _cell_length_b 19.408
  _cell_length_c 4.435
  _cell_angle_alpha 90.00
  _cell_angle_beta 90.00
  _cell_angle_gamma 90.00
  _cell_formula_units_Z 4
  _symmetry_space_group_name_H-M 'P 212121'
  _symmetry_Int_Tables_number 19
loop_
  _symmetry_equiv_pos_as_xyz
    1 x,y,z
    2 1/2+x,1/2-y,-z
    3 -x,1/2+y,1/2-z
    4 1/2-x,-y,1/2+z
loop_
  _atom_site_label
  _atom_site_fract_x
  _atom_site_fract_y
  _atom_site_fract_z
```

|        |          |          |          |      |
|--------|----------|----------|----------|------|
| C1     | -0.41727 | -0.15442 | -0.55770 | # 1  |
| N'2    | -0.46813 | -0.11019 | -0.36170 | # 2  |
| N3     | -0.21845 | -0.17507 | -0.63965 | # 3  |
| H*4    | -0.09103 | -0.15351 | -0.53579 | # 4  |
| H*5    | -0.19942 | -0.21118 | -0.80091 | # 5  |
| N6     | -0.59205 | -0.19350 | -0.74291 | # 6  |
| O7     | -0.53067 | -0.23576 | -0.92948 | # 7  |
| O8     | -0.77838 | -0.17903 | -0.68805 | # 8  |
| H*9    | -0.63086 | -0.10478 | -0.34631 | # 9  |
| #XC1   | -0.32811 | -0.14850 | -0.52622 | # 10 |
| #XN'2  | -0.43328 | -0.10706 | -0.34575 | # 11 |
| #XN3   | -0.20386 | -0.18056 | -0.66352 | # 12 |
| #XH*4  | -0.06920 | -0.15381 | -0.53595 | # 13 |
| #XH*5  | -0.17355 | -0.20317 | -0.76349 | # 14 |
| #XN6   | -0.62484 | -0.20293 | -0.78707 | # 15 |
| #XO7   | -0.58773 | -0.22389 | -0.87925 | # 16 |
| #XO8   | -0.72741 | -0.19009 | -0.73500 | # 17 |
| #XH*9  | -0.63080 | -0.09607 | -0.30717 | # 18 |
| N1+    | -0.01376 | 0.44286  | 0.53210  | # 19 |
| O2+    | -0.13068 | 0.46389  | 0.33767  | # 20 |
| O3+    | -0.05227 | 0.40727  | 0.75083  | # 21 |
| O4+    | 0.20241  | 0.46329  | 0.49709  | # 22 |
| H*5+   | 0.27392  | 0.44234  | 0.66973  | # 23 |
| #XN1+  | -0.08552 | 0.43865  | 0.52660  | # 24 |
| #XO2+  | -0.02650 | 0.47354  | 0.32212  | # 25 |
| #XO3+  | 0.05593  | 0.42172  | 0.70519  | # 26 |
| #XO4+  | 0.14596  | 0.45033  | 0.55694  | # 27 |
| #XH*5+ | 0.26782  | 0.44439  | 0.65329  | # 28 |
| #XLP1+ | -0.03343 | 0.43156  | 0.51978  | # 29 |
| #XLP1- | -0.04427 | 0.44746  | 0.56557  | # 30 |
| #XLP2+ | -0.13243 | 0.44344  | 0.40739  | # 31 |
| #XLP2- | -0.14150 | 0.45674  | 0.44569  | # 32 |
| #XLP3+ | -0.10295 | 0.42792  | 0.73639  | # 33 |
| #XLP3- | -0.08266 | 0.39816  | 0.65070  | # 34 |
| #XLP4+ | 0.25281  | 0.44171  | 0.44233  | # 35 |
| #XLP4- | 0.22210  | 0.48675  | 0.57203  | # 36 |
| #END   |          |          |          |      |

```
data_NO2F_HNO3_3
  _chemical_name_systematic
;RAS NH3 PVDZ
```

```
E(total)=-4.27716E+01 E(coul)=-2.28638E+01 E(vdW)=-1.99077E+01 Density= 1.94836
;
```

```
_cell_length_a 10.028
_cell_length_b 4.978
_cell_length_c 5.499
_cell_angle_alpha 109.14
_cell_angle_beta 91.28
_cell_angle_gamma 89.29
_cell_formula_units_Z 2
_symmetry_space_group_name_H-M 'P -1 ' '
```

```

_symmetry_Int_Tables_number 2
loop_
_symmetry_equiv_pos_as_xyz
  1 x,y,z
  2 -x,-y,-z
loop_
_atom_site_label
_atom_site_fract_x
_atom_site_fract_y
_atom_site_fract_z
C1      -0.10092 -0.27643  0.81518      # 1
N'2     0.02283 -0.30136  0.77586      # 2
N3      -0.17302 -0.37977  0.96900      # 3
H*4     -0.12513 -0.49190  1.06762      # 4
H*5     -0.27222 -0.34465  0.98370      # 5
N6      -0.19232 -0.11009  0.67990      # 6
O7      -0.31160 -0.09467  0.72736      # 7
O8      -0.13796 -0.00679  0.53574      # 8
H*9     0.05073 -0.20160  0.64995      # 9
#XC1    -0.09221 -0.34280  0.88417      # 10
#XN'2   0.02843 -0.32837  0.80283      # 11
#XN3    -0.18905 -0.38212  0.98029      # 12
#XH*4   -0.12773 -0.50585  1.08452      # 13
#XH*5   -0.25267 -0.37221  1.00373      # 14
#XN6    -0.21513 -0.07611  0.65452      # 15
#XO7    -0.27484 -0.07285  0.68322      # 16
#XO8    -0.17205 -0.02567  0.57517      # 17
#XH*9   0.07427 -0.21312  0.65000      # 18
N1+     0.60791  0.20281  0.31213      # 19
O2+     0.63861  0.36187  0.19966      # 20
O3+     0.57988 -0.04806  0.23072      # 21
O4+     0.60437  0.33178  0.58196      # 22
H*5+    0.57834  0.17688  0.64232      # 23
#XN1+   0.61140  0.17836  0.22525      # 24
#XO2+   0.63672  0.42261  0.32950      # 25
#XO3+   0.58189  0.04664  0.37019      # 26
#XO4+   0.59845  0.24372  0.50355      # 27
#XH*5+  0.58079  0.19193  0.63745      # 28
#XLP1+  0.62547  0.17136  0.28241      # 29
#XLP1-  0.58941  0.19035  0.27718      # 30
#XLP2+  0.64195  0.25596  0.18023      # 31
#XLP2-  0.61178  0.27185  0.17586      # 32
#XLP3+  0.55541  0.01400  0.18525      # 33
#XLP3-  0.62290 -0.02155  0.19504      # 34
#XLP4+  0.65274  0.30888  0.63064      # 35
#XLP4-  0.55059  0.36269  0.61583      # 36
#END

```

```

data_NO2F_HNO3_4
_chemical_name_systematic
;RAS NH3 PVDZ

```

E(total)=-4.26339E+01 E(coul)=-2.35338E+01 E(vdW)=-1.91002E+01 Density= 1.91962

;

\_cell\_length\_a 6.397  
\_cell\_length\_b 6.567  
\_cell\_length\_c 12.528  
\_cell\_angle\_alpha 90.00  
\_cell\_angle\_beta 90.00  
\_cell\_angle\_gamma 90.00  
\_cell\_formula\_units\_Z 4  
\_symmetry\_space\_group\_name\_H-M 'P NA21 '

\_symmetry\_Int\_Tables\_number 33

loop\_

\_symmetry\_equiv\_pos\_as\_xyz

1 x,y,z  
2 1/2-x,1/2+y,1/2+z  
3 1/2+x,1/2-y,z  
4 -x,-y,1/2+z

loop\_

\_atom\_site\_label

\_atom\_site\_fract\_x

\_atom\_site\_fract\_y

\_atom\_site\_fract\_z

|        |         |         |          |      |
|--------|---------|---------|----------|------|
| C1     | 0.98546 | 0.43141 | 0.72944  | # 1  |
| N'2    | 0.98895 | 0.24125 | 0.71502  | # 2  |
| N3     | 0.91611 | 0.53464 | 0.81572  | # 3  |
| H*4    | 0.85893 | 0.45451 | 0.87784  | # 4  |
| H*5    | 0.92196 | 0.68805 | 0.81728  | # 5  |
| N6     | 1.06737 | 0.58133 | 0.64237  | # 6  |
| O7     | 1.05909 | 0.76407 | 0.66197  | # 7  |
| O8     | 1.13415 | 0.50511 | 0.56056  | # 8  |
| H*9    | 1.04992 | 0.20512 | 0.64215  | # 9  |
| #XC1   | 0.94880 | 0.41388 | 0.77111  | # 10 |
| #XN'2  | 0.97432 | 0.23099 | 0.73146  | # 11 |
| #XN3   | 0.91247 | 0.55892 | 0.82127  | # 12 |
| #XH*4  | 0.85059 | 0.45757 | 0.88770  | # 13 |
| #XH*5  | 0.90902 | 0.65649 | 0.83061  | # 14 |
| #XN6   | 1.08351 | 0.61826 | 0.62562  | # 15 |
| #XO7   | 1.07682 | 0.70945 | 0.63837  | # 16 |
| #XO8   | 1.11849 | 0.55585 | 0.58155  | # 17 |
| #XH*9  | 1.04671 | 0.16851 | 0.64388  | # 18 |
| N1+    | 0.32362 | 0.47452 | -0.04953 | # 19 |
| O2+    | 0.30438 | 0.58837 | 0.02474  | # 20 |
| O3+    | 0.24223 | 0.31077 | -0.06702 | # 21 |
| O4+    | 0.46390 | 0.54478 | -0.12831 | # 22 |
| H*5+   | 0.46141 | 0.43691 | -0.18170 | # 23 |
| #XN1+  | 0.28160 | 0.46339 | -0.02084 | # 24 |
| #XO2+  | 0.37164 | 0.62129 | -0.01343 | # 25 |
| #XO3+  | 0.31990 | 0.36594 | -0.10228 | # 26 |
| #XO4+  | 0.41381 | 0.49034 | -0.11526 | # 27 |
| #XH*5+ | 0.46208 | 0.44733 | -0.17690 | # 28 |
| #XLP1+ | 0.28350 | 0.47490 | -0.04839 | # 29 |
| #XLP1- | 0.32773 | 0.44857 | -0.03431 | # 30 |



```

#XLP2+  0.25849  0.53482  0.00810      # 31
#XLP2-  0.29549  0.51280  0.01988      # 32
#XLP3+  0.27425  0.31840 -0.02961      # 33
#XLP3-  0.19150  0.36767 -0.05595      # 34
#XLP4+  0.41983  0.58223 -0.16336      # 35
#XLP4-  0.54509  0.50766 -0.12348      # 36
#END

```

```

data_NO2F_HNO3_5
  _chemical_name_systematic
;RAS NH3 PVDZ

```

```

E(total)=-4.25882E+01 E(coul)=-2.24709E+01 E(vdW)=-2.01173E+01 Density= 1.95940
;

```

```

  _cell_length_a  8.541
  _cell_length_b  5.980
  _cell_length_c 20.199
  _cell_angle_alpha  90.00
  _cell_angle_beta   88.14
  _cell_angle_gamma  90.00
  _cell_formula_units_Z  8
  _symmetry_space_group_name_H-M 'C 2/C '
  _symmetry_Int_Tables_number 15

```

```

loop_
  _symmetry_equiv_pos_as_xyz

```

```

  1 x,y,z
  2 -x,y,1/2-z
  3 -x,-y,-z
  4 x,-y,1/2+z
  5 1/2+x,1/2+y,z
  6 1/2-x,1/2+y,1/2-z
  7 1/2-x,1/2-y,-z
  8 1/2+x,1/2-y,1/2+z

```

```

loop_

```

```

  _atom_site_label
  _atom_site_fract_x
  _atom_site_fract_y
  _atom_site_fract_z
C1      0.20417  0.54059  0.19974      # 1
N'2     0.21180  0.53861  0.26203      # 2
N3      0.07479  0.54272  0.16303      # 3
H*4    -0.03089  0.54280  0.18676      # 4
H*5     0.08473  0.54418  0.11315      # 5
N6      0.35534  0.54084  0.15427      # 6
O7      0.33886  0.54282  0.09421      # 7
O8      0.47978  0.53902  0.18205      # 8
H*9     0.32521  0.53730  0.27646      # 9
#XC1    0.13622  0.54099  0.20390      # 10
#XN'2   0.18471  0.53874  0.26476      # 11
#XN3    0.06789  0.54302  0.15494      # 12
#XH*4   -0.04638  0.54296  0.18540      # 13
#XH*5    0.06089  0.54406  0.12291      # 14

```

|        |         |          |         |      |
|--------|---------|----------|---------|------|
| #XN6   | 0.38507 | 0.54096  | 0.14290 | # 15 |
| #XO7   | 0.37210 | 0.54199  | 0.11281 | # 16 |
| #XO8   | 0.45039 | 0.53978  | 0.16480 | # 17 |
| #XH*9  | 0.31948 | 0.53698  | 0.28828 | # 18 |
| N1+    | 0.19313 | -0.01017 | 0.55355 | # 19 |
| O2+    | 0.32607 | -0.03080 | 0.57002 | # 20 |
| O3+    | 0.12005 | 0.15646  | 0.53942 | # 21 |
| O4+    | 0.11036 | -0.21398 | 0.55038 | # 22 |
| H*5+   | 0.00685 | -0.16842 | 0.53659 | # 23 |
| #XN1+  | 0.22768 | 0.04698  | 0.55578 | # 24 |
| #XO2+  | 0.28563 | -0.12821 | 0.56840 | # 25 |
| #XO3+  | 0.09024 | 0.03721  | 0.53978 | # 26 |
| #XO4+  | 0.11102 | -0.12966 | 0.54770 | # 27 |
| #XH*5+ | 0.01639 | -0.17336 | 0.53789 | # 28 |
| #XLP1+ | 0.20658 | 0.01418  | 0.54456 | # 29 |
| #XLP1- | 0.19350 | 0.02076  | 0.56238 | # 30 |
| #XLP2+ | 0.29764 | 0.02625  | 0.55658 | # 31 |
| #XLP2- | 0.28669 | 0.03175  | 0.57149 | # 32 |
| #XLP3+ | 0.14971 | 0.16167  | 0.56110 | # 33 |
| #XLP3- | 0.17420 | 0.14935  | 0.52775 | # 34 |
| #XLP4+ | 0.10897 | -0.24667 | 0.52354 | # 35 |
| #XLP4- | 0.07189 | -0.22803 | 0.57402 | # 36 |
| #END   |         |          |         |      |

**S14.** Optimized crystal structure coordinates for formamidinium dinitramide (ionic form).

data\_HF\_DN\_1

\_chemical\_name\_systematic

;RAS NNO22\_C2\_PVDZ

E(total)=-1.60080E+02 E(coul)=-1.43197E+02 E(vdW)=-1.68826E+01 Density= 1.85383

;

\_cell\_length\_a 12.051

\_cell\_length\_b 13.164

\_cell\_length\_c 3.450

\_cell\_angle\_alpha 90.00

\_cell\_angle\_beta 98.40

\_cell\_angle\_gamma 90.00

\_cell\_formula\_units\_Z 4

\_symmetry\_space\_group\_name\_H-M 'P 21/A '

\_symmetry\_Int\_Tables\_number 14

loop\_

\_symmetry\_equiv\_pos\_as\_xyz

1 x,y,z

2 1/2-x,1/2+y,-z

3 -x,-y,-z

4 1/2+x,1/2-y,z

loop\_

\_atom\_site\_label

\_atom\_site\_fract\_x

\_atom\_site\_fract\_y

\_atom\_site\_fract\_z

|        |          |          |         |      |
|--------|----------|----------|---------|------|
| C1     | 0.21398  | 0.03970  | 0.91161 | # 1  |
| N2     | 0.22276  | 0.12873  | 0.74580 | # 2  |
| H*3    | 0.15296  | 0.17042  | 0.65727 | # 3  |
| H*4    | 0.29749  | 0.15864  | 0.70067 | # 4  |
| N5     | 0.29868  | -0.02055 | 1.03718 | # 5  |
| H*6    | 0.28445  | -0.08811 | 1.16189 | # 6  |
| H*7    | 0.37949  | -0.00259 | 1.01538 | # 7  |
| H8     | 0.13008  | 0.01388  | 0.94772 | # 8  |
| #XC1   | 0.21590  | 0.04029  | 0.91078 | # 9  |
| #XN2   | 0.21749  | 0.12994  | 0.74275 | # 10 |
| #XH*3  | 0.13526  | 0.18505  | 0.62718 | # 11 |
| #XH*4  | 0.30835  | 0.16543  | 0.68953 | # 12 |
| #XN5   | 0.29591  | -0.02424 | 1.04370 | # 13 |
| #XH*6  | 0.28441  | -0.10820 | 1.19960 | # 14 |
| #XH*7  | 0.39338  | -0.00176 | 1.01587 | # 15 |
| #XH8   | 0.13649  | 0.01585  | 0.94496 | # 16 |
| N'1+   | -0.08678 | 0.29009  | 0.42575 | # 17 |
| N2+    | 0.01417  | 0.33709  | 0.40378 | # 18 |
| O3+    | 0.00457  | 0.41892  | 0.22072 | # 19 |
| O4+    | 0.10487  | 0.30597  | 0.57820 | # 20 |
| N5+    | -0.07929 | 0.18729  | 0.49831 | # 21 |
| O6+    | -0.00407 | 0.13303  | 0.40130 | # 22 |
| O7+    | -0.16082 | 0.15235  | 0.63886 | # 23 |
| #XN'1+ | -0.08670 | 0.29005  | 0.42579 | # 24 |
| #XN2+  | 0.01437  | 0.33834  | 0.40444 | # 25 |
| #XO3+  | 0.01086  | 0.41223  | 0.22309 | # 26 |
| #XO4+  | 0.10809  | 0.31611  | 0.56375 | # 27 |
| #XN5+  | -0.08037 | 0.18649  | 0.49724 | # 28 |
| #XO6+  | -0.01195 | 0.12529  | 0.41357 | # 29 |
| #XO7+  | -0.15126 | 0.15088  | 0.64388 | # 30 |
| #XLP1+ | -0.06665 | 0.30226  | 0.77334 | # 31 |
| #XLP1- | -0.08990 | 0.26916  | 0.08610 | # 32 |
| #XLP2+ | 0.00082  | 0.37806  | 0.64757 | # 33 |
| #XLP2- | 0.03881  | 0.31946  | 0.09951 | # 34 |
| #XLP5+ | -0.04819 | 0.17624  | 0.82859 | # 35 |
| #XLP5- | -0.12637 | 0.17741  | 0.22633 | # 36 |
| #END   |          |          |         |      |

data\_HF\_DN\_2

\_chemical\_name\_systematic

;RAS NNO22\_C2\_PVDZ

E(total)=-1.60063E+02 E(coul)=-1.42888E+02 E(vdW)=-1.71749E+01 Density= 1.90013

;

\_cell\_length\_a 14.331

\_cell\_length\_b 11.932

\_cell\_length\_c 3.426

\_cell\_angle\_alpha 90.00

\_cell\_angle\_beta 115.61

\_cell\_angle\_gamma 90.00

\_cell\_formula\_units\_Z 4

\_symmetry\_space\_group\_name\_H-M 'P 21/A '

\_symmetry\_Int\_Tables\_number 14

loop\_

\_symmetry\_equiv\_pos\_as\_xyz

- 1 x,y,z
- 2 1/2-x,1/2+y,-z
- 3 -x,-y,-z
- 4 1/2+x,1/2-y,z

loop\_

\_atom\_site\_label

\_atom\_site\_fract\_x

\_atom\_site\_fract\_y

\_atom\_site\_fract\_z

|        |          |         |         |      |
|--------|----------|---------|---------|------|
| C1     | 0.04700  | 0.28534 | 0.17198 | # 1  |
| N2     | -0.01222 | 0.20092 | 0.16969 | # 2  |
| H*3    | -0.08092 | 0.21586 | 0.17821 | # 3  |
| H*4    | 0.00767  | 0.11965 | 0.15960 | # 4  |
| N5     | 0.13733  | 0.27567 | 0.16176 | # 5  |
| H*6    | 0.17808  | 0.34532 | 0.16448 | # 6  |
| H*7    | 0.16919  | 0.20038 | 0.15104 | # 7  |
| H8     | 0.01909  | 0.36980 | 0.18320 | # 8  |
| #XC1   | 0.04764  | 0.28341 | 0.17172 | # 9  |
| #XN2   | -0.01601 | 0.20374 | 0.17036 | # 10 |
| #XH*3  | -0.10127 | 0.21609 | 0.18032 | # 11 |
| #XH*4  | 0.00880  | 0.10570 | 0.15811 | # 12 |
| #XN5   | 0.13845  | 0.28095 | 0.16216 | # 13 |
| #XH*6  | 0.19252  | 0.36294 | 0.16474 | # 14 |
| #XH*7  | 0.17629  | 0.18942 | 0.14922 | # 15 |
| #XH8   | 0.02122  | 0.36335 | 0.18234 | # 16 |
| N'1+   | -0.28742 | 0.41825 | 0.86898 | # 17 |
| N2+    | -0.33380 | 0.52012 | 0.71432 | # 18 |
| O3+    | -0.41758 | 0.51240 | 0.38515 | # 19 |
| O4+    | -0.30045 | 0.60990 | 0.90481 | # 20 |
| N5+    | -0.18249 | 0.42365 | 1.12565 | # 21 |
| O6+    | -0.12626 | 0.49800 | 1.09125 | # 22 |
| O7+    | -0.14791 | 0.34122 | 1.36909 | # 23 |
| #XN'1+ | -0.28737 | 0.41833 | 0.86905 | # 24 |
| #XN2+  | -0.33507 | 0.52034 | 0.71262 | # 25 |
| #XO3+  | -0.41067 | 0.51855 | 0.39677 | # 26 |
| #XO4+  | -0.31075 | 0.61334 | 0.87030 | # 27 |
| #XN5+  | -0.18169 | 0.42255 | 1.12652 | # 28 |
| #XO6+  | -0.11847 | 0.48996 | 1.12138 | # 29 |
| #XO7+  | -0.14626 | 0.35074 | 1.37237 | # 30 |
| #XLP1+ | -0.29894 | 0.43798 | 1.18854 | # 31 |
| #XLP1- | -0.26671 | 0.41533 | 0.56541 | # 32 |
| #XLP2+ | -0.37533 | 0.50712 | 0.89229 | # 33 |
| #XLP2- | -0.31596 | 0.54496 | 0.42758 | # 34 |
| #XLP5+ | -0.17023 | 0.45395 | 1.46483 | # 35 |
| #XLP5- | -0.17358 | 0.37687 | 0.89083 | # 36 |

#END

data\_HF\_DN\_3

\_chemical\_name\_systematic

;RAS NNO22\_C2\_PVDZ

E(total)=-1.59436E+02 E(coul)=-1.46324E+02 E(vdW)=-1.31127E+01 Density= 1.73657

;

\_cell\_length\_a 13.745

\_cell\_length\_b 8.248

\_cell\_length\_c 7.133

\_cell\_angle\_alpha 97.76

\_cell\_angle\_beta 152.45

\_cell\_angle\_gamma 107.59

\_cell\_formula\_units\_Z 1

\_symmetry\_space\_group\_name\_H-M 'P 1'

\_symmetry\_Int\_Tables\_number 1

loop\_

\_symmetry\_equiv\_pos\_as\_xyz

1 x,y,z

loop\_

\_atom\_site\_label

\_atom\_site\_fract\_x

\_atom\_site\_fract\_y

\_atom\_site\_fract\_z

|        |          |          |          |      |
|--------|----------|----------|----------|------|
| C1     | 0.04519  | 0.22145  | 0.50349  | # 1  |
| N2     | 0.20689  | 0.19759  | 0.84832  | # 2  |
| H*3    | 0.06255  | 0.05743  | 0.70588  | # 3  |
| H*4    | 0.47493  | 0.31483  | 1.25932  | # 4  |
| N5     | 0.20564  | 0.39578  | 0.64283  | # 5  |
| H*6    | 0.06039  | 0.40067  | 0.35001  | # 6  |
| H*7    | 0.47358  | 0.52889  | 1.03739  | # 7  |
| H8     | -0.24393 | 0.08640  | 0.06894  | # 8  |
| #XC1   | 0.05181  | 0.22454  | 0.51343  | # 9  |
| #XN2   | 0.19306  | 0.18786  | 0.83087  | # 10 |
| #XH*3  | 0.03214  | 0.02010  | 0.68387  | # 11 |
| #XH*4  | 0.51759  | 0.33079  | 1.32750  | # 12 |
| #XN5   | 0.19177  | 0.39256  | 0.61863  | # 13 |
| #XH*6  | 0.02969  | 0.40945  | 0.28019  | # 14 |
| #XH*7  | 0.51619  | 0.55276  | 1.09736  | # 15 |
| #XH8   | -0.22185 | 0.09671  | 0.10213  | # 16 |
| N'1+   | -0.57346 | 0.17711  | -0.16511 | # 17 |
| N2+    | -0.17520 | 0.36570  | 0.62118  | # 18 |
| O3+    | -0.07357 | 0.47136  | 0.97812  | # 19 |
| O4+    | 0.02868  | 0.39403  | 0.89079  | # 20 |
| N5+    | -0.56777 | 0.18969  | -0.34619 | # 21 |
| O6+    | -0.15359 | 0.46915  | 0.31017  | # 22 |
| O7+    | -1.00884 | -0.08501 | -1.21170 | # 23 |
| #XN'1+ | -0.57316 | 0.17726  | -0.16466 | # 24 |
| #XN2+  | -0.17559 | 0.36461  | 0.62249  | # 25 |
| #XO3+  | -0.04810 | 0.48587  | 1.01103  | # 26 |
| #XO4+  | 0.05074  | 0.40772  | 0.94998  | # 27 |
| #XN5+  | -0.57067 | 0.18914  | -0.35243 | # 28 |
| #XO6+  | -0.19300 | 0.44682  | 0.22499  | # 29 |
| #XO7+  | -0.97532 | -0.07014 | -1.15622 | # 30 |
| #XLP1+ | -0.83378 | -0.13217 | -0.67443 | # 31 |

```

#XLP1-  -0.24980  0.51794  0.43912      # 32
#XLP2+  -0.48057  0.07299  0.10329      # 33
#XLP2-   0.22246  0.72425  1.35401      # 34
#XLP5+  -0.75780 -0.06547 -0.76796      # 35
#XLP5-  -0.48749  0.37030 -0.16555      # 36
#END

```

```

data_HF_DN_4
  _chemical_name_systematic
;RAS NNO22_C2_PVDZ

```

E(total)=-1.59208E+02 E(coul)=-1.43782E+02 E(vdW)=-1.54262E+01 Density= 1.81540

```

;
  _cell_length_a  8.437
  _cell_length_b  7.145
  _cell_length_c  7.572
  _cell_angle_alpha  92.42
  _cell_angle_beta  56.16
  _cell_angle_gamma 126.22
  _cell_formula_units_Z 2
  _symmetry_space_group_name_H-M 'P -1 '
  _symmetry_Int_Tables_number 2
loop_
  _symmetry_equiv_pos_as_xyz
    1 x,y,z
    2 -x,-y,-z
loop_
  _atom_site_label
  _atom_site_fract_x
  _atom_site_fract_y
  _atom_site_fract_z
C1      0.11807 -0.25018  0.25010      # 1
N2      0.27136 -0.06164  0.27621      # 2
H*3     0.26590  0.07617  0.29545      # 3
H*4     0.39787 -0.04638  0.27817      # 4
N5      0.10905 -0.43851  0.22383      # 5
H*6     -0.01519 -0.57650  0.20474      # 6
H*7     0.22257 -0.45342  0.22159      # 7
H8      -0.01141 -0.25036  0.25026      # 8
#XC1    0.12103 -0.25017  0.25010      # 9
#XN2    0.26782 -0.05546  0.27708      # 10
#XH*3   0.27110  0.11999  0.30156      # 11
#XH*4   0.42020 -0.03884  0.27919      # 12
#XN5    0.10018 -0.44470  0.22297      # 13
#XH*6   -0.04775 -0.62036  0.19866      # 14
#XH*7   0.23842 -0.46091  0.22052      # 15
#XH8    -0.00153 -0.25035  0.25024      # 16
N'1+    0.51718 -0.25029  0.25002      # 17
N2+     0.67910 -0.06817  0.28453      # 18
O3+     0.72783  0.13396  0.24107      # 19
O4+     0.75061 -0.10898  0.37038      # 20
N5+     0.53164 -0.43217  0.21547      # 21

```

|        |         |          |         |      |
|--------|---------|----------|---------|------|
| O6+    | 0.73000 | -0.39101 | 0.12956 | # 22 |
| O7+    | 0.33469 | -0.63450 | 0.25896 | # 23 |
| #XN'1+ | 0.51731 | -0.25029 | 0.25002 | # 24 |
| #XN2+  | 0.67860 | -0.06641 | 0.28585 | # 25 |
| #XO3+  | 0.73969 | 0.12907  | 0.23820 | # 26 |
| #XO4+  | 0.75966 | -0.08354 | 0.37015 | # 27 |
| #XN5+  | 0.53070 | -0.43393 | 0.21415 | # 28 |
| #XO6+  | 0.71338 | -0.41646 | 0.12979 | # 29 |
| #XO7+  | 0.34859 | -0.62957 | 0.26183 | # 30 |
| #XLP1+ | 0.36208 | -0.38111 | 0.45706 | # 31 |
| #XLP1- | 0.69993 | -0.11943 | 0.04297 | # 32 |
| #XLP2+ | 0.51169 | -0.13879 | 0.45054 | # 33 |
| #XLP2- | 0.88824 | 0.07816  | 0.10313 | # 34 |
| #XLP5+ | 0.41316 | -0.57839 | 0.39685 | # 35 |
| #XLP5- | 0.60076 | -0.36167 | 0.04948 | # 36 |
| #END   |         |          |         |      |

data\_HF\_DN\_5

\_chemical\_name\_systematic

;RAS NNO22\_C2\_PVDZ

E(total)=-1.58932E+02 E(coul)=-1.41474E+02 E(vdW)=-1.74575E+01 Density= 1.88248

;

\_cell\_length\_a 3.340

\_cell\_length\_b 13.566

\_cell\_length\_c 11.874

\_cell\_angle\_alpha 90.00

\_cell\_angle\_beta 82.34

\_cell\_angle\_gamma 90.00

\_cell\_formula\_units\_Z 4

\_symmetry\_space\_group\_name\_H-M 'P 21/C '

\_symmetry\_Int\_Tables\_number 14

loop\_

\_symmetry\_equiv\_pos\_as\_xyz

1 x,y,z

2 -x,1/2+y,1/2-z

3 -x,-y,-z

4 x,1/2-y,1/2+z

loop\_

\_atom\_site\_label

\_atom\_site\_fract\_x

\_atom\_site\_fract\_y

\_atom\_site\_fract\_z

|    |         |         |         |     |
|----|---------|---------|---------|-----|
| C1 | 0.03439 | 0.54301 | 0.21554 | # 1 |
|----|---------|---------|---------|-----|

|    |          |         |         |     |
|----|----------|---------|---------|-----|
| N2 | -0.12156 | 0.48529 | 0.29902 | # 2 |
|----|----------|---------|---------|-----|

|     |          |         |         |     |
|-----|----------|---------|---------|-----|
| H*3 | -0.20370 | 0.41548 | 0.28212 | # 3 |
|-----|----------|---------|---------|-----|

|     |          |         |         |     |
|-----|----------|---------|---------|-----|
| H*4 | -0.16511 | 0.50743 | 0.38144 | # 4 |
|-----|----------|---------|---------|-----|

|    |         |         |         |     |
|----|---------|---------|---------|-----|
| N5 | 0.15111 | 0.63454 | 0.22770 | # 5 |
|----|---------|---------|---------|-----|

|     |         |         |         |     |
|-----|---------|---------|---------|-----|
| H*6 | 0.26852 | 0.67396 | 0.15862 | # 6 |
|-----|---------|---------|---------|-----|

|     |         |         |         |     |
|-----|---------|---------|---------|-----|
| H*7 | 0.12939 | 0.66863 | 0.30441 | # 7 |
|-----|---------|---------|---------|-----|

|    |         |         |         |     |
|----|---------|---------|---------|-----|
| H8 | 0.06961 | 0.51268 | 0.12970 | # 8 |
|----|---------|---------|---------|-----|

|      |         |         |         |     |
|------|---------|---------|---------|-----|
| #XC1 | 0.03359 | 0.54371 | 0.21750 | # 9 |
|------|---------|---------|---------|-----|

|        |          |         |         |      |
|--------|----------|---------|---------|------|
| #XN2   | -0.12435 | 0.48138 | 0.29608 | # 10 |
| #XH*3  | -0.23170 | 0.39491 | 0.28135 | # 11 |
| #XH*4  | -0.17574 | 0.50893 | 0.39552 | # 12 |
| #XN5   | 0.15728  | 0.63554 | 0.22242 | # 13 |
| #XH*6  | 0.30397  | 0.68812 | 0.14125 | # 14 |
| #XH*7  | 0.12964  | 0.67608 | 0.31565 | # 15 |
| #XH8   | 0.06692  | 0.51500 | 0.13625 | # 16 |
| N'1+   | 0.39663  | 0.28325 | 0.58090 | # 17 |
| N2+    | 0.41790  | 0.33384 | 0.47977 | # 18 |
| O3+    | 0.25510  | 0.41656 | 0.48924 | # 19 |
| O4+    | 0.61092  | 0.30406 | 0.38997 | # 20 |
| N5+    | 0.44041  | 0.18268 | 0.56964 | # 21 |
| O6+    | 0.34692  | 0.13598 | 0.48746 | # 22 |
| O7+    | 0.54855  | 0.14196 | 0.65462 | # 23 |
| #XN'1+ | 0.39668  | 0.28321 | 0.58082 | # 24 |
| #XN2+  | 0.41901  | 0.33504 | 0.47965 | # 25 |
| #XO3+  | 0.25723  | 0.41034 | 0.48253 | # 26 |
| #XO4+  | 0.60036  | 0.31433 | 0.38686 | # 27 |
| #XN5+  | 0.43877  | 0.18188 | 0.57068 | # 28 |
| #XO6+  | 0.35469  | 0.12786 | 0.49540 | # 29 |
| #XO7+  | 0.55592  | 0.14088 | 0.64491 | # 30 |
| #XLP1+ | 0.75821  | 0.28808 | 0.56991 | # 31 |
| #XLP1- | 0.04525  | 0.27058 | 0.57427 | # 32 |
| #XLP2+ | 0.67368  | 0.36727 | 0.50183 | # 33 |
| #XLP2- | 0.11133  | 0.32484 | 0.44587 | # 34 |
| #XLP5+ | 0.78042  | 0.16599 | 0.54576 | # 35 |
| #XLP5- | 0.14839  | 0.17710 | 0.61021 | # 36 |
| #END   |          |         |         |      |

**S15.** Optimized crystal structure coordinates for azidoformamidinium dinitramide (ionic form).

data\_N3F\_DN\_1

\_chemical\_name\_systematic

;RAS NNO22\_C2\_PVDZ

E(total)=-1.53196E+02 E(coul)=-1.37673E+02 E(vdW)=-1.55228E+01 Density= 1.71085

;

\_cell\_length\_a 8.672

\_cell\_length\_b 12.267

\_cell\_length\_c 7.526

\_cell\_angle\_alpha 90.00

\_cell\_angle\_beta 111.29

\_cell\_angle\_gamma 90.00

\_cell\_formula\_units\_Z 4

\_symmetry\_space\_group\_name\_H-M 'P 21/A '

\_symmetry\_Int\_Tables\_number 14

loop\_

\_symmetry\_equiv\_pos\_as\_xyz

1 x,y,z

2 1/2-x,1/2+y,-z

3 -x,-y,-z

4 1/2+x,1/2-y,z



```

loop_
  _atom_site_label
  _atom_site_fract_x
  _atom_site_fract_y
  _atom_site_fract_z
C1      -0.09151  0.49752 -0.27555      # 1
N2      -0.22712  0.44628 -0.27550      # 2
H*3     -0.34089  0.48024 -0.33272      # 3
H*4     -0.22049  0.37107 -0.21768      # 4
N5       0.05747  0.45251 -0.20022      # 5
H*6      0.15768  0.49399 -0.20295      # 6
H*7      0.07469  0.37766 -0.13968      # 7
N'8     -0.09156  0.59926 -0.35127      # 8
N9      -0.22930  0.64700 -0.42548      # 9
N'10    -0.34023  0.70055 -0.49647      # 10
#XC1    -0.08575  0.49304 -0.27060      # 11
#XN2    -0.22995  0.45199 -0.28054      # 12
#XH*3   -0.38098  0.48236 -0.34555      # 13
#XH*4   -0.22454  0.35164 -0.20435      # 14
#XN5     0.05767  0.45098 -0.19903      # 15
#XH*6    0.19044  0.49770 -0.19651      # 16
#XH*7    0.09114  0.35977 -0.12175      # 17
#XN'8   -0.09439  0.60713 -0.35792      # 18
#XN9    -0.23561  0.65671 -0.43447      # 19
#XN'10  -0.34676  0.69011 -0.49054      # 20
N'1+    -0.10556  0.12667  0.09731      # 21
N2+     -0.09782  0.21131 -0.01931      # 22
O3+     -0.23184  0.22989 -0.15133      # 23
O4+      0.02589  0.26967  0.01331      # 24
N5+      0.04469  0.07937  0.19898      # 25
O6+      0.16269  0.07812  0.14347      # 26
O7+      0.04595  0.02941  0.34356      # 27
#XN'1+  -0.10544  0.12670  0.09730      # 28
#XN2+   -0.09929  0.21226 -0.02010      # 29
#XO3+   -0.21811  0.22991 -0.14989      # 30
#XO4+    0.01325  0.27568 -0.00268      # 31
#XN5+    0.04487  0.07811  0.19988      # 32
#XO6+    0.16855  0.07051  0.16010      # 33
#XO7+    0.05529  0.03484  0.33993      # 34
#XLP1+  -0.07462  0.19275  0.22284      # 35
#XLP1-  -0.11172  0.06645 -0.03057      # 36
#XLP2+  -0.13949  0.26088  0.06449      # 37
#XLP2-  -0.08502  0.17418 -0.15439      # 38
#XLP5+   0.11308  0.13568  0.32637      # 39
#XLP5-  -0.00168  0.00899  0.12350      # 40
#END

```

```

data_N3F_DN_2
  _chemical_name_systematic
;RAS NNÖ22_C2_PVDZ

```

E(total)=-1.53116E+02 E(coul)=-1.37910E+02 E(vdW)=-1.52066E+01 Density= 1.74241

```

;
_cell_length_a 19.427
_cell_length_b 6.443
_cell_length_c 8.014
_cell_angle_alpha 90.00
_cell_angle_beta 133.10
_cell_angle_gamma 90.00
_cell_formula_units_Z 4
_symmetry_space_group_name_H-M 'P 21/A '
_symmetry_Int_Tables_number 14
loop_
_symmetry_equiv_pos_as_xyz
  1 x,y,z
  2 1/2-x,1/2+y,-z
  3 -x,-y,-z
  4 1/2+x,1/2-y,z
loop_
_atom_site_label
_atom_site_fract_x
_atom_site_fract_y
_atom_site_fract_z
C1      0.58516  0.22419 -0.32398      # 1
N2      0.67658  0.21605 -0.21076      # 2
H*3     0.70037  0.24493 -0.28810      # 3
H*4     0.72555  0.18040 -0.04227      # 4
N5      0.55438  0.18613 -0.22150      # 5
H*6     0.48433  0.19382 -0.31328      # 6
H*7     0.59871  0.14942 -0.05368      # 7
N'8     0.51523  0.27139 -0.55181      # 8
N9      0.53947  0.30942 -0.66028      # 9
N'10    0.54863  0.34705 -0.78144      # 10
#XC1    0.58585  0.22145 -0.31388      # 11
#XN2    0.67383  0.21903 -0.22357      # 12
#XH*3   0.71553  0.25053 -0.29329      # 13
#XH*4   0.74059  0.17185  0.00121      # 14
#XN5    0.55534  0.18540 -0.21808      # 15
#XH*6   0.46821  0.19176 -0.32121      # 16
#XH*7   0.60420  0.13923 -0.01343      # 17
#XN'8   0.51099  0.27537 -0.56947      # 18
#XN9    0.53542  0.31465 -0.68208      # 19
#XN'10  0.55850  0.34296 -0.75815      # 20
N'1+    0.13779  0.68784  0.42697      # 21
N2+     0.20757  0.72927  0.65723      # 22
O3+     0.17964  0.83137  0.73332      # 23
O4+     0.28818  0.65669  0.78108      # 24
N5+     0.16993  0.64263  0.32223      # 25
O6+     0.24525  0.70944  0.39041      # 26
O7+     0.11221  0.54371  0.14066      # 27
#XN'1+  0.13786  0.68783  0.42707      # 28
#XN2+   0.20740  0.72907  0.65902      # 29
#XO3+   0.18643  0.83117  0.73662      # 30
#XO4+   0.28825  0.66607  0.79826      # 31

```

```

#XN5+    0.16926  0.64286  0.31941    # 32
#XO6+    0.24080  0.70023  0.36783    # 33
#XO7+    0.12030  0.54335  0.15570    # 34
#XLP1+   0.14930  0.50801  0.47870    # 35
#XLP1-   0.14226  0.86708  0.39493    # 36
#XLP2+   0.18506  0.59872  0.68288    # 37
#XLP2-   0.23350  0.89697  0.67771    # 38
#XLP5+   0.19637  0.47300  0.36625    # 39
#XLP5-   0.13564  0.77528  0.22663    # 40
#END

```

```

data_N3F_DN_3
  _chemical_name_systematic
;RAS NNO22_C2_PVDZ

```

```

E(total)=-1.52914E+02 E(coul)=-1.36962E+02 E(vdW)=-1.59521E+01 Density= 1.77272
;

```

```

  _cell_length_a  10.977
  _cell_length_b   9.605
  _cell_length_c   6.991
  _cell_angle_alpha  90.00
  _cell_angle_beta  102.39
  _cell_angle_gamma  90.00
  _cell_formula_units_Z  4
  _symmetry_space_group_name_H-M 'P 21/A '
  _symmetry_Int_Tables_number 14

```

```

loop_
  _symmetry_equiv_pos_as_xyz
  1 x,y,z
  2 1/2-x,1/2+y,-z
  3 -x,-y,-z
  4 1/2+x,1/2-y,z

```

```

loop_
  _atom_site_label
  _atom_site_fract_x
  _atom_site_fract_y
  _atom_site_fract_z
C1      0.52526 -0.10789  0.27057    # 1
N2      0.58498 -0.22283  0.34599    # 2
H*3     0.54724 -0.31869  0.31737    # 3
H*4     0.67078 -0.21780  0.43510    # 4
N5      0.57530  0.01762  0.30870    # 5
H*6     0.52703  0.10258  0.24864    # 6
H*7     0.66059  0.03161  0.39628    # 7
N'8     0.40912 -0.10717  0.14908    # 8
N9      0.35586 -0.22318  0.10651    # 9
N'10    0.29574 -0.31648  0.05421    # 10
#XC1    0.53032 -0.10306  0.27532    # 11
#XN2    0.57850 -0.22518  0.33947    # 12
#XH*3   0.54519 -0.35254  0.31904    # 13
#XH*4   0.69301 -0.22136  0.45874    # 14
#XN5    0.57704  0.01778  0.31049    # 15

```

|        |         |          |         |      |
|--------|---------|----------|---------|------|
| #XH*6  | 0.52250 | 0.13029  | 0.24078 | # 16 |
| #XH*7  | 0.68087 | 0.04537  | 0.41592 | # 17 |
| #XN'8  | 0.40016 | -0.10951 | 0.13998 | # 18 |
| #XN9   | 0.34484 | -0.22843 | 0.09559 | # 19 |
| #XN'10 | 0.30770 | -0.32208 | 0.06736 | # 20 |
| N'1+   | 0.52203 | 0.47889  | 0.30207 | # 21 |
| N2+    | 0.64199 | 0.43182  | 0.36992 | # 22 |
| O3+    | 0.72268 | 0.52379  | 0.37571 | # 23 |
| O4+    | 0.66689 | 0.31303  | 0.43540 | # 24 |
| N5+    | 0.43676 | 0.37653  | 0.22964 | # 25 |
| O6+    | 0.46495 | 0.26671  | 0.15718 | # 26 |
| O7+    | 0.32692 | 0.41012  | 0.22769 | # 27 |
| #XN'1+ | 0.52205 | 0.47878  | 0.30206 | # 28 |
| #XN2+  | 0.64307 | 0.43271  | 0.37151 | # 29 |
| #XO3+  | 0.72200 | 0.51210  | 0.37173 | # 30 |
| #XO4+  | 0.67934 | 0.32000  | 0.44073 | # 31 |
| #XN5+  | 0.43540 | 0.37686  | 0.22809 | # 32 |
| #XO6+  | 0.45101 | 0.26614  | 0.15205 | # 33 |
| #XO7+  | 0.33266 | 0.39999  | 0.23101 | # 34 |
| #XLP1+ | 0.50412 | 0.45162  | 0.46114 | # 35 |
| #XLP1- | 0.54537 | 0.48273  | 0.14228 | # 36 |
| #XLP2+ | 0.63366 | 0.46607  | 0.50636 | # 37 |
| #XLP2- | 0.68545 | 0.41174  | 0.23584 | # 38 |
| #XLP5+ | 0.41114 | 0.31981  | 0.36138 | # 39 |
| #XLP5- | 0.42576 | 0.42554  | 0.09575 | # 40 |
| #END   |         |          |         |      |

data\_N3F\_DN\_4

\_chemical\_name\_systematic

;RAS NNO22\_C2\_PVDZ

E(total)=-1.52428E+02 E(coul)=-1.37162E+02 E(vdW)=-1.52659E+01 Density= 1.76333

;

\_cell\_length\_a 7.516

\_cell\_length\_b 7.964

\_cell\_length\_c 6.474

\_cell\_angle\_alpha 105.09

\_cell\_angle\_beta 86.24

\_cell\_angle\_gamma 104.75

\_cell\_formula\_units\_Z 2

\_symmetry\_space\_group\_name\_H-M 'P -1 '

\_symmetry\_Int\_Tables\_number 2

loop\_

\_symmetry\_equiv\_pos\_as\_xyz

1 x,y,z

2 -x,-y,-z

loop\_

\_atom\_site\_label

\_atom\_site\_fract\_x

\_atom\_site\_fract\_y

\_atom\_site\_fract\_z

C1 0.21991 -0.05634 0.25908

# 1

|        |          |          |         |      |
|--------|----------|----------|---------|------|
| N2     | 0.39941  | 0.01362  | 0.23946 | # 2  |
| H*3    | 0.44820  | 0.13611  | 0.21082 | # 3  |
| H*4    | 0.49345  | -0.05424 | 0.25273 | # 4  |
| N5     | 0.15675  | -0.21718 | 0.29667 | # 5  |
| H*6    | 0.01931  | -0.26587 | 0.31058 | # 6  |
| H*7    | 0.24158  | -0.29353 | 0.31204 | # 7  |
| N'8    | 0.08536  | 0.02806  | 0.24295 | # 8  |
| N9     | 0.13566  | 0.18187  | 0.20722 | # 9  |
| N'10   | 0.15620  | 0.31824  | 0.17606 | # 10 |
| #XC1   | 0.22110  | -0.06482 | 0.26096 | # 11 |
| #XN2   | 0.39419  | 0.02070  | 0.23798 | # 12 |
| #XH*3  | 0.47842  | 0.17111  | 0.20229 | # 13 |
| #XH*4  | 0.52250  | -0.06700 | 0.25498 | # 14 |
| #XN5   | 0.15859  | -0.21862 | 0.29695 | # 15 |
| #XH*6  | -0.01258 | -0.28997 | 0.31670 | # 16 |
| #XH*7  | 0.25171  | -0.32200 | 0.31824 | # 17 |
| #XN'8  | 0.07728  | 0.03694  | 0.24112 | # 18 |
| #XN9   | 0.12802  | 0.19514  | 0.20440 | # 19 |
| #XN'10 | 0.17538  | 0.31500  | 0.17638 | # 20 |
| N'1+   | 0.23913  | 0.38505  | 0.70111 | # 21 |
| N2+    | 0.29848  | 0.56852  | 0.73546 | # 22 |
| O3+    | 0.19401  | 0.63572  | 0.65899 | # 23 |
| O4+    | 0.43346  | 0.65997  | 0.84766 | # 24 |
| N5+    | 0.37503  | 0.30038  | 0.71386 | # 25 |
| O6+    | 0.53875  | 0.36008  | 0.67371 | # 26 |
| O7+    | 0.31544  | 0.15015  | 0.75076 | # 27 |
| #XN'1+ | 0.23928  | 0.38512  | 0.70115 | # 28 |
| #XN2+  | 0.29707  | 0.56989  | 0.73620 | # 29 |
| #XO3+  | 0.20977  | 0.63837  | 0.66051 | # 30 |
| #XO4+  | 0.42516  | 0.67411  | 0.84391 | # 31 |
| #XN5+  | 0.37484  | 0.29819  | 0.71273 | # 32 |
| #XO6+  | 0.53867  | 0.34170  | 0.67544 | # 33 |
| #XO7+  | 0.32819  | 0.16193  | 0.75612 | # 34 |
| #XLP1+ | 0.22504  | 0.41046  | 0.89164 | # 35 |
| #XLP1- | 0.28384  | 0.37512  | 0.51797 | # 36 |
| #XLP2+ | 0.21488  | 0.57725  | 0.86871 | # 37 |
| #XLP2- | 0.36922  | 0.59878  | 0.58072 | # 38 |
| #XLP5+ | 0.40462  | 0.32089  | 0.89281 | # 39 |
| #XLP5- | 0.34983  | 0.23659  | 0.55437 | # 40 |
| #END   |          |          |         |      |

data\_N3F\_DN\_5  
 \_chemical\_name\_systematic  
 ;RAS NNO22\_C2\_PVDZ

E(total)=-1.52366E+02 E(coul)=-1.37653E+02 E(vdW)=-1.47129E+01 Density= 1.69678  
 ;  
 \_cell\_length\_a 8.096  
 \_cell\_length\_b 9.529  
 \_cell\_length\_c 9.856  
 \_cell\_angle\_alpha 90.00  
 \_cell\_angle\_beta 98.45

```

_cell_angle_gamma 90.00
_cell_formula_units_Z 4
_symmetry_space_group_name_H-M 'P 21/C '
_symmetry_Int_Tables_number 14
loop_
_symmetry_equiv_pos_as_xyz
  1 x,y,z
  2 -x,1/2+y,1/2-z
  3 -x,-y,-z
  4 x,1/2-y,1/2+z
loop_
_atom_site_label
_atom_site_fract_x
_atom_site_fract_y
_atom_site_fract_z
C1      0.27631 -0.21928 0.50227 # 1
N2      0.32508 -0.33150 0.57862 # 2
H*3     0.28696 -0.42959 0.54979 # 3
H*4     0.40250 -0.32204 0.66869 # 4
N5      0.32678 -0.09082 0.54068 # 5
H*6     0.28702 -0.00809 0.47989 # 6
H*7     0.40414 -0.07241 0.62920 # 7
N'8     0.17183 -0.22454 0.37947 # 8
N9      0.11888 -0.34363 0.33656 # 9
N'10    0.06073 -0.44031 0.28379 # 10
#XC1    0.28108 -0.21418 0.50706 # 11
#XN2    0.31914 -0.33419 0.57203 # 12
#XH*3   0.28365 -0.46365 0.55152 # 13
#XH*4   0.42235 -0.32448 0.69259 # 14
#XN5    0.32835 -0.09057 0.54250 # 15
#XH*6   0.28415 0.01947 0.47192 # 16
#XH*7   0.42298 -0.05757 0.64903 # 17
#XN'8   0.16366 -0.22734 0.37027 # 18
#XN9    0.10873 -0.34946 0.32552 # 19
#XN'10  0.07126 -0.44530 0.29708 # 20
N'1+    0.27411 0.36749 0.55540 # 21
N2+     0.41369 0.32695 0.64376 # 22
O3+     0.50056 0.42726 0.69401 # 23
O4+     0.44251 0.20377 0.67952 # 24
N5+     0.20905 0.26567 0.46372 # 25
O6+     0.29423 0.17104 0.42288 # 26
O7+     0.05955 0.28500 0.41626 # 27
#XN'1+  0.27416 0.36739 0.55540 # 28
#XN2+   0.41432 0.32775 0.64526 # 29
#XO3+   0.50335 0.41619 0.69012 # 30
#XO4+   0.45550 0.21151 0.68902 # 31
#XN5+   0.20781 0.26604 0.46224 # 32
#XO6+   0.27805 0.16942 0.41352 # 33
#XO7+   0.06765 0.27527 0.41966 # 34
#XLP1+  0.19367 0.31604 0.63543 # 35
#XLP1-  0.36623 0.39662 0.47485 # 36
#XLP2+  0.34342 0.34061 0.72197 # 37

```

```

#XLP2- 0.52655 0.33147 0.58447 # 38
#XLP5+ 0.13449 0.18799 0.52130 # 39
#XLP5- 0.23779 0.33135 0.38736 # 40
#END

```

**S16.** Optimized crystal structure coordinates for guanidinium dinitramide (ionic form).

```

data_GH_DN_1
  _chemical_name_systematic
;RAS NNO22_C2_PVDZ

E(total)=-1.65604E+02 E(coul)=-1.45512E+02 E(vdW)=-2.00919E+01 Density= 1.89561
;
  _cell_length_a 7.731
  _cell_length_b 11.786
  _cell_length_c 6.581
  _cell_angle_alpha 90.00
  _cell_angle_beta 76.10
  _cell_angle_gamma 90.00
  _cell_formula_units_Z 4
  _symmetry_space_group_name_H-M 'P 21/A '
  _symmetry_Int_Tables_number 14
loop_
  _symmetry_equiv_pos_as_xyz
  1 x,y,z
  2 1/2-x,1/2+y,-z
  3 -x,-y,-z
  4 1/2+x,1/2-y,z
loop_
  _atom_site_label
  _atom_site_fract_x
  _atom_site_fract_y
  _atom_site_fract_z
C1 0.25124 -0.11934 0.05129 # 1
N2 0.10104 -0.12255 -0.01552 # 2
H*3 -0.01841 -0.10503 0.08178 # 3
H*4 0.10259 -0.14259 -0.16525 # 4
N5 0.24521 -0.09255 0.25033 # 5
H*6 0.35709 -0.08963 0.30405 # 6
H*7 0.12859 -0.07444 0.35283 # 7
N8 0.40748 -0.14292 -0.08094 # 8
H*9 0.41504 -0.16336 -0.23195 # 9
H*10 0.52254 -0.14098 -0.03372 # 10
#XN2 0.10230 -0.12252 -0.01496 # 11
#XH*3 -0.01631 -0.10584 0.07634 # 12
#XH*4 0.09957 -0.14180 -0.16022 # 13
#XN5 0.24526 -0.09277 0.24866 # 14
#XH*6 0.35224 -0.08922 0.30570 # 15
#XH*7 0.13341 -0.07468 0.35242 # 16
#XN8 0.40617 -0.14272 -0.07983 # 17
#XH*9 0.41780 -0.16295 -0.22817 # 18
#XH*10 0.52075 -0.14153 -0.03832 # 19

```

|        |         |          |          |      |
|--------|---------|----------|----------|------|
| #XLP2+ | 0.09856 | -0.15158 | -0.00023 | # 20 |
| #XLP2- | 0.10941 | -0.09340 | -0.02819 | # 21 |
| #XLP5+ | 0.23990 | -0.12216 | 0.26041  | # 22 |
| #XLP5- | 0.25075 | -0.06398 | 0.23245  | # 23 |
| #XLP8+ | 0.39899 | -0.17154 | -0.06437 | # 24 |
| #XLP8- | 0.40984 | -0.11336 | -0.09233 | # 25 |
| N'1+   | 0.16862 | 0.11361  | 0.62756  | # 26 |
| N2+    | 0.33385 | 0.12001  | 0.67110  | # 27 |
| O3+    | 0.32838 | 0.11689  | 0.86169  | # 28 |
| O4+    | 0.47520 | 0.11873  | 0.53429  | # 29 |
| N5+    | 0.16161 | 0.15552  | 0.43443  | # 30 |
| O6+    | 0.26233 | 0.23072  | 0.34237  | # 31 |
| O7+    | 0.03412 | 0.11804  | 0.36953  | # 32 |
| #XN'1+ | 0.16874 | 0.11364  | 0.62744  | # 33 |
| #XN2+  | 0.33446 | 0.11919  | 0.67289  | # 34 |
| #XO3+  | 0.33679 | 0.12177  | 0.84749  | # 35 |
| #XO4+  | 0.48170 | 0.11749  | 0.55382  | # 36 |
| #XN5+  | 0.15971 | 0.15594  | 0.43385  | # 37 |
| #XO6+  | 0.24904 | 0.22988  | 0.32927  | # 38 |
| #XO7+  | 0.04882 | 0.12021  | 0.36188  | # 39 |
| #XLP1+ | 0.21741 | 0.02559  | 0.54134  | # 40 |
| #XLP1- | 0.14464 | 0.20920  | 0.69031  | # 41 |
| #XLP2+ | 0.33243 | 0.03253  | 0.67508  | # 42 |
| #XLP2- | 0.35507 | 0.21247  | 0.71822  | # 43 |
| #XLP5+ | 0.22171 | 0.08788  | 0.31043  | # 44 |
| #XLP5- | 0.07486 | 0.21607  | 0.51380  | # 45 |
| #END   |         |          |          |      |

data\_GH\_DN\_2

\_chemical\_name\_systematic

;RAS NNO22\_C2\_PVDZ

E(total)=-1.64151E+02 E(coul)=-1.45432E+02 E(vdW)=-1.87195E+01 Density= 1.83904

;

\_cell\_length\_a 7.690

\_cell\_length\_b 12.046

\_cell\_length\_c 6.650

\_cell\_angle\_alpha 90.00

\_cell\_angle\_beta 103.10

\_cell\_angle\_gamma 90.00

\_cell\_formula\_units\_Z 4

\_symmetry\_space\_group\_name\_H-M 'P 21/A '

\_symmetry\_Int\_Tables\_number 14

loop\_

\_symmetry\_equiv\_pos\_as\_xyz

1 x,y,z

2 1/2-x,1/2+y,-z

3 -x,-y,-z

4 1/2+x,1/2-y,z

loop\_

\_atom\_site\_label

\_atom\_site\_fract\_x



| <u>_atom_site_fract_y</u> | <u>_atom_site_fract_z</u> |      |
|---------------------------|---------------------------|------|
| C1                        | 0.07146 0.62423 -0.92089  | # 1  |
| N2                        | 0.07554 0.60062 -0.72337  | # 2  |
| H*3                       | 0.19177 0.58437 -0.62159  | # 3  |
| H*4                       | -0.03750 0.59834 -0.67012 | # 4  |
| N5                        | 0.22315 0.62666 -0.98711  | # 5  |
| H*6                       | 0.22308 0.64431 -1.13570  | # 6  |
| H*7                       | 0.34228 0.61092 -0.89051  | # 7  |
| N8                        | -0.08431 0.64540 -1.05219 | # 8  |
| H*9                       | -0.20048 0.64400 -1.00538 | # 9  |
| H*10                      | -0.09041 0.66342 -1.20205 | # 10 |
| #XN2                      | 0.07550 0.60082 -0.72503  | # 11 |
| #XH*3                     | 0.18693 0.58459 -0.62201  | # 12 |
| #XH*4                     | -0.03263 0.59797 -0.66848 | # 13 |
| #XN5                      | 0.22188 0.62664 -0.98656  | # 14 |
| #XH*6                     | 0.22608 0.64361 -1.13071  | # 15 |
| #XH*7                     | 0.34023 0.61163 -0.89590  | # 16 |
| #XN8                      | -0.08301 0.64522 -1.05109 | # 17 |
| #XH*9                     | -0.19864 0.64448 -1.00995 | # 18 |
| #XH*10                    | -0.09322 0.66308 -1.19829 | # 19 |
| #XLP2+                    | 0.07050 0.57244 -0.73971  | # 20 |
| #XLP2-                    | 0.08042 0.62972 -0.71478  | # 21 |
| #XLP5+                    | 0.21522 0.59797 -0.99828  | # 22 |
| #XLP5-                    | 0.22514 0.65525 -0.97335  | # 23 |
| #XLP8+                    | -0.08622 0.61635 -1.06208 | # 24 |
| #XLP8-                    | -0.07630 0.67363 -1.03715 | # 25 |
| N'1+                      | -0.01476 0.87935 0.39860  | # 26 |
| N2+                       | -0.02157 0.84183 0.59223  | # 27 |
| O3+                       | -0.15476 0.87524 0.65171  | # 28 |
| O4+                       | 0.08527 0.77363 0.69027   | # 29 |
| N5+                       | 0.15288 0.87797 0.35766   | # 30 |
| O6+                       | 0.29209 0.88664 0.49322   | # 31 |
| O7+                       | 0.15093 0.87726 0.16988   | # 32 |
| #XN'1+                    | -0.01464 0.87932 0.39872  | # 33 |
| #XN2+                     | -0.02345 0.84136 0.59282  | # 34 |
| #XO3+                     | -0.13993 0.87376 0.65954  | # 35 |
| #XO4+                     | 0.07156 0.77424 0.70298   | # 36 |
| #XN5+                     | 0.15345 0.87875 0.35583   | # 37 |
| #XO6+                     | 0.29890 0.88771 0.47396   | # 38 |
| #XO7+                     | 0.15958 0.87305 0.18435   | # 39 |
| #XLP1+                    | -0.02814 0.78407 0.34521  | # 40 |
| #XLP1-                    | 0.02384 0.96854 0.47594   | # 41 |
| #XLP2+                    | -0.10118 0.77827 0.51888  | # 42 |
| #XLP2-                    | 0.02965 0.91222 0.70863   | # 43 |
| #XLP5+                    | 0.18432 0.78759 0.31973   | # 44 |
| #XLP5-                    | 0.14288 0.96321 0.34593   | # 45 |
| #END                      |                           |      |

data\_GH\_DN\_3  
\_chemical\_name\_systematic  
;RAS NNO22\_C2\_PVDZ

E(total)=-1.63742E+02 E(coul)=-1.44824E+02 E(vdW)=-1.89180E+01 Density= 1.83723

;

\_cell\_length\_a 6.499  
\_cell\_length\_b 12.216  
\_cell\_length\_c 7.789  
\_cell\_angle\_alpha 90.00  
\_cell\_angle\_beta 76.21  
\_cell\_angle\_gamma 90.00  
\_cell\_formula\_units\_Z 4  
\_symmetry\_space\_group\_name\_H-M 'C C ' ' '  
\_symmetry\_Int\_Tables\_number 9

loop\_

\_symmetry\_equiv\_pos\_as\_xyz

1 x,y,z  
2 x,-y,1/2+z  
3 1/2+x,1/2+y,z  
4 1/2+x,1/2-y,1/2+z

loop\_

\_atom\_site\_label

\_atom\_site\_fract\_x

\_atom\_site\_fract\_y

\_atom\_site\_fract\_z

|        |         |          |          |      |
|--------|---------|----------|----------|------|
| C1     | 0.38230 | -0.12589 | -0.20150 | # 1  |
| N2     | 0.31400 | -0.12048 | -0.35021 | # 2  |
| H*3    | 0.41172 | -0.13665 | -0.46925 | # 3  |
| H*4    | 0.16268 | -0.10006 | -0.34790 | # 4  |
| N5     | 0.58343 | -0.15313 | -0.20851 | # 5  |
| H*6    | 0.63830 | -0.15770 | -0.09775 | # 6  |
| H*7    | 0.68642 | -0.16994 | -0.32477 | # 7  |
| N8     | 0.24946 | -0.10406 | -0.04577 | # 8  |
| H*9    | 0.09688 | -0.08332 | -0.03749 | # 9  |
| H*10   | 0.29778 | -0.10766 | 0.06817  | # 10 |
| #XN2   | 0.31457 | -0.12052 | -0.34897 | # 11 |
| #XH*3  | 0.40623 | -0.13586 | -0.46714 | # 12 |
| #XH*4  | 0.16774 | -0.10082 | -0.35093 | # 13 |
| #XN5   | 0.58174 | -0.15290 | -0.20845 | # 14 |
| #XH*6  | 0.63994 | -0.15804 | -0.10258 | # 15 |
| #XH*7  | 0.68603 | -0.16977 | -0.31998 | # 16 |
| #XN8   | 0.25057 | -0.10424 | -0.04708 | # 17 |
| #XH*9  | 0.10072 | -0.08376 | -0.03477 | # 18 |
| #XH*10 | 0.29312 | -0.10708 | 0.06642  | # 19 |
| #XLP2+ | 0.32999 | -0.09256 | -0.35196 | # 20 |
| #XLP2- | 0.30069 | -0.14861 | -0.34263 | # 21 |
| #XLP5+ | 0.59414 | -0.12457 | -0.21304 | # 22 |
| #XLP5- | 0.56483 | -0.18062 | -0.20370 | # 23 |
| #XLP8+ | 0.26672 | -0.07646 | -0.05349 | # 24 |
| #XLP8- | 0.23741 | -0.13251 | -0.04416 | # 25 |
| N'1+   | 0.19787 | 0.63382  | -0.12055 | # 26 |
| N2+    | 0.39204 | 0.59119  | -0.11427 | # 27 |
| O3+    | 0.45941 | 0.62558  | 0.01260  | # 28 |
| O4+    | 0.48241 | 0.51845  | -0.21519 | # 29 |

|        |          |         |          |      |
|--------|----------|---------|----------|------|
| N5+    | 0.15307  | 0.62947 | -0.28448 | # 30 |
| O6+    | 0.29121  | 0.63034 | -0.42476 | # 31 |
| O7+    | -0.03981 | 0.63455 | -0.27887 | # 32 |
| #XN'1+ | 0.19799  | 0.63378 | -0.12067 | # 33 |
| #XN2+  | 0.39261  | 0.59076 | -0.11239 | # 34 |
| #XO3+  | 0.46703  | 0.62351 | -0.00201 | # 35 |
| #XO4+  | 0.49574  | 0.51900 | -0.20200 | # 36 |
| #XN5+  | 0.15127  | 0.63028 | -0.28507 | # 37 |
| #XO6+  | 0.27147  | 0.63180 | -0.43118 | # 38 |
| #XO7+  | -0.02562 | 0.62975 | -0.28729 | # 39 |
| #XLP1+ | 0.13116  | 0.54211 | -0.09793 | # 40 |
| #XLP1- | 0.28801  | 0.71815 | -0.16789 | # 41 |
| #XLP2+ | 0.30988  | 0.53295 | -0.02894 | # 42 |
| #XLP2- | 0.51971  | 0.65553 | -0.17311 | # 43 |
| #XLP5+ | 0.10216  | 0.54098 | -0.30666 | # 44 |
| #XLP5- | 0.15200  | 0.71388 | -0.28196 | # 45 |
| #END   |          |         |          |      |

```
data_GH_DN_4
_chemical_name_systematic
;RAS NNO22_C2_PVDZ
```

E(total)=-1.63533E+02 E(coul)=-1.45160E+02 E(vdW)=-1.83735E+01 Density= 1.82234

```
;
_cell_length_a 6.634
_cell_length_b 12.162
_cell_length_c 7.705
_cell_angle_alpha 90.00
_cell_angle_beta 103.09
_cell_angle_gamma 90.00
_cell_formula_units_Z 4
_symmetry_space_group_name_H-M 'P 21/C '
_symmetry_Int_Tables_number 14
loop_
_symmetry_equiv_pos_as_xyz
1 x,y,z
2 -x,1/2+y,1/2-z
3 -x,-y,-z
4 x,1/2-y,1/2+z
loop_
_atom_site_label
_atom_site_fract_x
_atom_site_fract_y
_atom_site_fract_z
C1 0.06667 0.62697 0.86298 # 1
N2 -0.13214 0.60561 0.85876 # 2
H*3 -0.18516 0.60284 0.97172 # 3
H*4 -0.23514 0.59162 0.74248 # 4
N5 0.19958 0.64518 1.01880 # 5
H*6 0.35043 0.66147 1.02500 # 6
H*7 0.15306 0.64319 1.13491 # 7
N8 0.13256 0.63012 0.71137 # 8
```

|        |          |         |          |      |
|--------|----------|---------|----------|------|
| H*9    | 0.03474  | 0.61661 | 0.59220  | # 9  |
| H*10   | 0.28209  | 0.64611 | 0.71155  | # 10 |
| #XN2   | -0.13047 | 0.60579 | 0.85879  | # 11 |
| #XH*3  | -0.18684 | 0.60254 | 0.96686  | # 12 |
| #XH*4  | -0.23470 | 0.59179 | 0.74732  | # 13 |
| #XN5   | 0.19847  | 0.64503 | 1.01750  | # 14 |
| #XH*6  | 0.34667  | 0.66114 | 1.02781  | # 15 |
| #XH*7  | 0.15765  | 0.64363 | 1.13306  | # 16 |
| #XN8   | 0.13201  | 0.63010 | 0.71264  | # 17 |
| #XH*9  | 0.04018  | 0.61724 | 0.59426  | # 18 |
| #XH*10 | 0.27706  | 0.64550 | 0.70855  | # 19 |
| #XLP2+ | -0.11693 | 0.57750 | 0.86287  | # 20 |
| #XLP2- | -0.13955 | 0.63456 | 0.85481  | # 21 |
| #XLP5+ | 0.20829  | 0.61630 | 1.01978  | # 22 |
| #XLP5- | 0.18567  | 0.67335 | 1.01172  | # 23 |
| #XLP8+ | 0.14258  | 0.60154 | 0.71837  | # 24 |
| #XLP8- | 0.11995  | 0.65859 | 0.71031  | # 25 |
| N'1+   | 0.25411  | 0.12016 | 0.05096  | # 26 |
| N2+    | 0.44823  | 0.15695 | 0.04349  | # 27 |
| O3+    | 0.50709  | 0.12357 | -0.08964 | # 28 |
| O4+    | 0.54724  | 0.22446 | 0.14977  | # 29 |
| N5+    | 0.21377  | 0.12183 | 0.21853  | # 30 |
| O6+    | 0.35005  | 0.11318 | 0.35719  | # 31 |
| O7+    | 0.02568  | 0.12288 | 0.21713  | # 32 |
| #XN'1+ | 0.25423  | 0.12019 | 0.05108  | # 33 |
| #XN2+  | 0.44882  | 0.15741 | 0.04162  | # 34 |
| #XO3+  | 0.51500  | 0.12504 | -0.07485 | # 35 |
| #XO4+  | 0.55990  | 0.22382 | 0.13604  | # 36 |
| #XN5+  | 0.21193  | 0.12106 | 0.21910  | # 37 |
| #XO6+  | 0.33078  | 0.11216 | 0.36405  | # 38 |
| #XO7+  | 0.04023  | 0.12704 | 0.22572  | # 39 |
| #XLP1+ | 0.20111  | 0.21461 | 0.03755  | # 40 |
| #XLP1- | 0.33123  | 0.03173 | 0.08948  | # 41 |
| #XLP2+ | 0.37480  | 0.21994 | -0.03595 | # 42 |
| #XLP2- | 0.56463  | 0.08709 | 0.09447  | # 43 |
| #XLP5+ | 0.17641  | 0.21146 | 0.24983  | # 44 |
| #XLP5- | 0.20151  | 0.03741 | 0.20876  | # 45 |
| #END   |          |         |          |      |

```

data_GH_DN_5
  _chemical_name_systematic
;RAS NNO22_C2_PVDZ

```

E(total)=-1.63159E+02 E(coul)=-1.43762E+02 E(vdW)=-1.93973E+01 Density= 1.86442

```

;
  _cell_length_a 20.670
  _cell_length_b 3.411
  _cell_length_c 8.394
  _cell_angle_alpha 90.00
  _cell_angle_beta 90.00
  _cell_angle_gamma 90.00
  _cell_formula_units_Z 4

```

```

_symmetry_space_group_name_H-M 'P CA21 '
_symmetry_Int_Tables_number 29
loop_
_symmetry_equiv_pos_as_xyz
  1 x,y,z
  2 1/2-x,y,1/2+z
  3 1/2+x,-y,z
  4 -x,-y,1/2+z
loop_
_atom_site_label
_atom_site_fract_x
_atom_site_fract_y
_atom_site_fract_z
C1      0.87524  0.48840  0.46051      # 1
N2      0.82433  0.38134  0.37231      # 2
H*3     0.83014  0.25780  0.26382      # 3
H*4     0.77858  0.42085  0.41158      # 4
N5      0.93526  0.43260  0.40554      # 5
H*6     0.97439  0.51134  0.47023      # 6
H*7     0.94324  0.31006  0.29770      # 7
N8      0.86611  0.65127  0.60369      # 8
H*9     0.82118  0.69607  0.64749      # 9
H*10    0.90389  0.73430  0.67226      # 10
#XN2    0.82476  0.38224  0.37305      # 11
#XH*3   0.82889  0.26091  0.26668      # 12
#XH*4   0.77951  0.41707  0.40818      # 13
#XN5    0.93476  0.43307  0.40600      # 14
#XH*6   0.97392  0.50690  0.46641      # 15
#XH*7   0.94409  0.31415  0.30118      # 16
#XN8    0.86619  0.64991  0.60249      # 17
#XH*9   0.82290  0.69739  0.64845      # 18
#XH*10  0.90211  0.73399  0.67218      # 19
#XLP2+  0.82503  0.47773  0.35621      # 20
#XLP2-  0.82564  0.28914  0.39188      # 21
#XLP5+  0.93378  0.52799  0.38879      # 22
#XLP5-  0.93439  0.33940  0.42445      # 23
#XLP8+  0.86599  0.74237  0.58305      # 24
#XLP8-  0.86660  0.55378  0.61871      # 25
N'1+    0.13253 -0.96877  0.58748      # 26
N2+     0.18566 -0.89316  0.49344      # 27
O3+     0.22890 -0.70556  0.56317      # 28
O4+     0.19244 -1.02799  0.35755      # 29
N5+     0.07656 -1.04752  0.50452      # 30
O6+     0.06543 -0.91750  0.36959      # 31
O7+     0.03570 -1.23248  0.58353      # 32
#XN'1+  0.13253 -0.96877  0.58735      # 33
#XN2+   0.18642 -0.89361  0.49409      # 34
#XO3+   0.22678 -0.70548  0.55043      # 35
#XO4+   0.19898 -1.01092  0.36066      # 36
#XN5+   0.07582 -1.04704  0.50531      # 37
#XO6+   0.05901 -0.93443  0.37407      # 38
#XO7+   0.03741 -1.23302  0.57042      # 39

```

```

#XLP1+  0.14568 -1.30931  0.57330      # 40
#XLP1-  0.11893 -0.62872  0.57391      # 41
#XLP2+  0.20599 -1.14255  0.54159      # 42
#XLP2-  0.18133 -0.57504  0.44737      # 43
#XLP5+  0.07942 -1.36725  0.45962      # 44
#XLP5-  0.05781 -0.79637  0.55501      # 45
#END

```

**S17.** Optimized crystal structure coordinates for nitroformamidinium dinitramide (ionic form).

```

data_NO2F_DN_1
  _chemical_name_systematic
;RAS NNO22_C2_PVDZ

```

E(total)=-1.63944E+02 E(coul)=-1.44002E+02 E(vdW)=-1.99422E+01 Density= 1.93869

;

```

_cell_length_a  10.245
_cell_length_b   8.117
_cell_length_c  11.200
_cell_angle_alpha  90.00
_cell_angle_beta  133.83
_cell_angle_gamma  90.00
_cell_formula_units_Z  4

```

```

_symmetry_space_group_name_H-M 'P 21/A '
_symmetry_Int_Tables_number 14

```

loop\_

```

_symmetry_equiv_pos_as_xyz
  1 x,y,z
  2 1/2-x,1/2+y,-z
  3 -x,-y,-z
  4 1/2+x,1/2-y,z

```

loop\_

```

_atom_site_label
_atom_site_fract_x
_atom_site_fract_y
_atom_site_fract_z
C1      0.63686  0.30362 -0.23221      # 1
N2      0.66164  0.39970 -0.30842      # 2
H*3     0.68214  0.34575 -0.37663      # 3
H*4     0.66124  0.52455 -0.30230      # 4
N5      0.60830  0.34110 -0.13863      # 5
H*6     0.60181  0.45927 -0.11316      # 6
H*7     0.59200  0.24673 -0.08970      # 7
N8      0.64211  0.11824 -0.25630      # 8
O9      0.61912  0.02849 -0.18559      # 9
O10     0.66866  0.08291 -0.34328      # 10
#XC1    0.63686  0.30371 -0.23219      # 11
#XN2    0.66291  0.38330 -0.31314      # 12
#XH*3   0.68882  0.36604 -0.39738      # 13
#XH*4   0.66136  0.54338 -0.30198      # 14
#XN5    0.60801  0.32299 -0.13840      # 15
#XH*6   0.60066  0.47669 -0.10877      # 16

```

```

#XH*7    0.58461  0.25156 -0.06568    # 17
#XN8     0.64186  0.12725 -0.25513    # 18
#XO9     0.62231  0.01138 -0.19656    # 19
#XO10    0.66659  0.06002 -0.33751    # 20
N'1+     0.29940 -0.22081  0.69301    # 21
N2+      0.41134 -0.25262  0.85943    # 22
O3+      0.39457 -0.15209  0.93209    # 23
O4+      0.50755 -0.37705  0.92761    # 24
N5+      0.35527 -0.28896  0.62203    # 25
O6+      0.51579 -0.31745  0.69988    # 26
O7+      0.23103 -0.30549  0.46917    # 27
#XN'1+   0.29953 -0.22089  0.69308    # 28
#XN2+    0.41065 -0.25250  0.86042    # 29
#XO3+    0.40660 -0.15897  0.93540    # 30
#XO4+    0.50927 -0.37000  0.94097    # 31
#XN5+    0.35459 -0.28826  0.62027    # 32
#XO6+    0.50688 -0.32021  0.68242    # 33
#XO7+    0.24351 -0.31321  0.47979    # 34
#XLP1+   0.22843 -0.35034  0.66937    # 35
#XLP1-   0.39669 -0.10696  0.73162    # 36
#XLP2+   0.30422 -0.31586  0.82876    # 37
#XLP2-   0.53470 -0.16572  0.93046    # 38
#XLP5+   0.31815 -0.42723  0.60005    # 39
#XLP5-   0.36888 -0.17002  0.59952    # 40
#END

```

```

data_NO2F_DN_2
  _chemical_name_systematic
;RAS NNO22_C2_PVDZ

```

E(total)=-1.63857E+02 E(coul)=-1.43586E+02 E(vdW)=-2.02710E+01 Density= 1.94551

```

;
  _cell_length_a  10.269
  _cell_length_b  16.243
  _cell_length_c   8.028
  _cell_angle_alpha  90.00
  _cell_angle_beta   90.00
  _cell_angle_gamma  90.00
  _cell_formula_units_Z  8
  _symmetry_space_group_name_H-M 'P BCA '
  _symmetry_Int_Tables_number 61
loop_
  _symmetry_equiv_pos_as_xyz
    1 x,y,z
    2 1/2-x,1/2+y,z
    3 x,1/2-y,1/2+z
    4 1/2-x,-y,1/2+z
    5 -x,-y,-z
    6 1/2+x,1/2-y,-z
    7 -x,1/2+y,1/2-z
    8 1/2+x,y,1/2-z
loop_

```

```

_atom_site_label
_atom_site_fract_x
_atom_site_fract_y
_atom_site_fract_z
C1      -0.30891  0.88141 -0.19608      # 1
N2      -0.21186  0.92964 -0.15784      # 2
H*3     -0.16113  0.95619 -0.25306      # 3
H*4     -0.18545  0.94152 -0.03829      # 4
N5      -0.38795  0.84065 -0.09924      # 5
H*6     -0.38159  0.84239  0.02699      # 6
H*7     -0.45869  0.80580 -0.15403      # 7
N8      -0.33391  0.87102 -0.38357      # 8
O9      -0.42411  0.82619 -0.41962      # 9
O10     -0.26058  0.90884 -0.47404      # 10
#XC1    -0.30890  0.88141 -0.19599      # 11
#XN2    -0.21163  0.92997 -0.17615      # 12
#XH*3   -0.13621  0.96862 -0.24808      # 13
#XH*4   -0.18089  0.94361 -0.02066      # 14
#XN5    -0.39284  0.83839 -0.11584      # 15
#XH*6   -0.38126  0.84234  0.04603      # 16
#XH*7   -0.48021  0.79477 -0.13360      # 17
#XN8    -0.33270  0.87152 -0.37446      # 18
#XO9    -0.41813  0.82946 -0.44273      # 19
#XO10   -0.27196  0.90333 -0.49138      # 20
N'1+    0.47623  0.65411 -0.27499      # 21
N2+     0.36684  0.69025 -0.20805      # 22
O3+     0.37845  0.76573 -0.18510      # 23
O4+     0.26300  0.65303 -0.18655      # 24
N5+     0.48548  0.57055 -0.24870      # 25
O6+     0.43609  0.53523 -0.12755      # 26
O7+     0.55802  0.53492 -0.34999      # 27
#XN'1+  0.47616  0.65407 -0.27492      # 28
#XN2+   0.36624  0.69115 -0.20871      # 29
#XO3+   0.37358  0.76039 -0.17790      # 30
#XO4+   0.25905  0.66173 -0.18326      # 31
#XN5+   0.48689  0.57004 -0.24879      # 32
#XO6+   0.44434  0.52856 -0.13483      # 33
#XO7+   0.54827  0.53333 -0.34357      # 34
#XLP1+  0.41057  0.63838 -0.39431      # 35
#XLP1-  0.52619  0.66241 -0.14105      # 36
#XLP2+  0.34002  0.70425 -0.32857      # 37
#XLP2-  0.38403  0.69819 -0.06671      # 38
#XLP5+  0.41681  0.53824 -0.34211      # 39
#XLP5-  0.56811  0.58297 -0.18013      # 40
#END

```

```

data_NO2F_DN_3
_chemical_name_systematic
;RAS NNO22_C2_PVDZ

```

E(total)=-1.63325E+02 E(coul)=-1.44089E+02 E(vdW)=-1.92360E+01 Density= 1.96266  
;



```

_cell_length_a 7.468
_cell_length_b 11.524
_cell_length_c 7.712
_cell_angle_alpha 90.00
_cell_angle_beta 90.00
_cell_angle_gamma 90.00
_cell_formula_units_Z 4
_symmetry_space_group_name_H-M 'P 212121'
_symmetry_Int_Tables_number 19
loop_
_symmetry_equiv_pos_as_xyz
  1 x,y,z
  2 1/2+x,1/2-y,-z
  3 -x,1/2+y,1/2-z
  4 1/2-x,-y,1/2+z
loop_
_atom_site_label
_atom_site_fract_x
_atom_site_fract_y
_atom_site_fract_z
C1      0.12228 -0.34985 0.52998 # 1
N2      0.17330 -0.28473 0.65920 # 2
H*3     0.19226 -0.32348 0.77677 # 3
H*4     0.19449 -0.19804 0.64699 # 4
N5      0.08929 -0.32201 0.36918 # 5
H*6     0.10092 -0.23956 0.32392 # 6
H*7     0.05030 -0.38648 0.28667 # 7
N8      0.09724 -0.47887 0.57381 # 8
O9      0.04979 -0.53971 0.45392 # 9
O10     0.12780 -0.50509 0.72327 # 10
#XC1    0.12229 -0.34978 0.52995 # 11
#XN2    0.17219 -0.29620 0.66750 # 12
#XH*3   0.20503 -0.30983 0.81204 # 13
#XH*4   0.19795 -0.18497 0.64618 # 14
#XN5    0.08574 -0.33456 0.36903 # 15
#XH*6   0.10236 -0.22739 0.31616 # 16
#XH*7   0.04092 -0.38266 0.24546 # 17
#XN8    0.09846 -0.47260 0.57168 # 18
#XO9    0.05123 -0.55179 0.47295 # 19
#XO10   0.12096 -0.52084 0.71370 # 20
N'1+    0.61835 0.39132 0.56803 # 21
N2+     0.60788 0.50729 0.52632 # 22
O3+     0.48864 0.56020 0.60692 # 23
O4+     0.71636 0.55664 0.42993 # 24
N5+     0.69996 0.32322 0.44445 # 25
O6+     0.70030 0.34709 0.28795 # 26
O7+     0.75943 0.23009 0.50274 # 27
#XN'1+  0.61841 0.39136 0.56790 # 28
#XN2+   0.60760 0.50833 0.52780 # 29
#XO3+   0.49417 0.56052 0.59294 # 30
#XO4+   0.70604 0.56667 0.43708 # 31
#XN5+   0.69965 0.32178 0.44432 # 32

```

```

#XO6+    0.70757  0.33501  0.28790    # 33
#XO7+    0.76429  0.23675  0.49259    # 34
#XLP1+    0.76523  0.41176  0.62288    # 35
#XLP1-    0.48263  0.37839  0.48726    # 36
#XLP2+    0.68962  0.52237  0.63173    # 37
#XLP2-    0.49155  0.51883  0.42903    # 38
#XLP5+    0.85284  0.33628  0.45679    # 39
#XLP5-    0.57858  0.28147  0.43115    # 40
#END

```

```

data_NO2F_DN_4
  _chemical_name_systematic
;RAS NNO22_C2_PVDZ

```

E(total)=-1.63279E+02 E(coul)=-1.44900E+02 E(vdW)=-1.83790E+01 Density= 1.90103

;

```

_cell_length_a  11.097
_cell_length_b   8.669
_cell_length_c  11.292
_cell_angle_alpha  90.00
_cell_angle_beta  140.90
_cell_angle_gamma  90.00
_cell_formula_units_Z  4

```

```

_symmetry_space_group_name_H-M 'P 21/A '
_symmetry_Int_Tables_number 14

```

loop\_

```

_symmetry_equiv_pos_as_xyz
  1 x,y,z
  2 1/2-x,1/2+y,-z
  3 -x,-y,-z
  4 1/2+x,1/2-y,z

```

loop\_

```

_atom_site_label
_atom_site_fract_x
_atom_site_fract_y
_atom_site_fract_z
C1      0.33948  0.70117  0.75463    # 1
N2      0.36510  0.65000  0.66671    # 2
H*3     0.39236  0.72874  0.62246    # 3
H*4     0.35894  0.53612  0.64114    # 4
N5      0.30322  0.62566  0.82432    # 5
H*6     0.29001  0.50901  0.81671    # 6
H*7     0.28778  0.68761  0.88881    # 7
N8      0.35425  0.87702  0.77993    # 8
O9      0.33050  0.92505  0.86165    # 9
O10     0.38797  0.94766  0.71528    # 10
#XC1    0.33947  0.70109  0.75461    # 11
#XN2    0.36738  0.66672  0.66677    # 12
#XH*3   0.39951  0.72004  0.59997    # 13
#XH*4   0.35824  0.51922  0.63678    # 14
#XN5    0.30369  0.64167  0.82897    # 15
#XH*6   0.28782  0.49152  0.81613    # 16

```

|        |         |         |         |      |
|--------|---------|---------|---------|------|
| #XH*7  | 0.27862 | 0.67248 | 0.90787 | # 17 |
| #XN8   | 0.35354 | 0.86848 | 0.77870 | # 18 |
| #XO9   | 0.33515 | 0.94522 | 0.85661 | # 19 |
| #XO10  | 0.38652 | 0.96543 | 0.72578 | # 20 |
| N'1+   | 0.29060 | 0.80296 | 0.22193 | # 21 |
| N2+    | 0.35987 | 0.70941 | 0.18608 | # 22 |
| O3+    | 0.25010 | 0.69793 | 0.01601 | # 23 |
| O4+    | 0.52243 | 0.65319 | 0.31105 | # 24 |
| N5+    | 0.37005 | 0.77715 | 0.39228 | # 25 |
| O6+    | 0.43503 | 0.65075 | 0.47311 | # 26 |
| O7+    | 0.35485 | 0.88893 | 0.44932 | # 27 |
| #XN'1+ | 0.29071 | 0.80287 | 0.22203 | # 28 |
| #XN2+  | 0.35972 | 0.70986 | 0.18453 | # 29 |
| #XO3+  | 0.26011 | 0.68955 | 0.02864 | # 30 |
| #XO4+  | 0.51596 | 0.64953 | 0.29381 | # 31 |
| #XN5+  | 0.36899 | 0.77767 | 0.39274 | # 32 |
| #XO6+  | 0.43513 | 0.65953 | 0.48458 | # 33 |
| #XO7+  | 0.36656 | 0.87987 | 0.45634 | # 34 |
| #XLP1+ | 0.42386 | 0.88594 | 0.30375 | # 35 |
| #XLP1- | 0.18065 | 0.70127 | 0.16120 | # 36 |
| #XLP2+ | 0.41166 | 0.80839 | 0.18638 | # 37 |
| #XLP2- | 0.28761 | 0.59019 | 0.14035 | # 38 |
| #XLP5+ | 0.51874 | 0.83502 | 0.50715 | # 39 |
| #XLP5- | 0.23539 | 0.74468 | 0.31703 | # 40 |
| #END   |         |         |         |      |

```
data_NO2F_DN_5
  _chemical_name_systematic
;RAS NNO22_C2_PVDZ
```

E(total)=-1.63225E+02 E(coul)=-1.43051E+02 E(vdW)=-2.01736E+01 Density= 1.94285

```
;
  _cell_length_a 8.169
  _cell_length_b 8.340
  _cell_length_c 10.623
  _cell_angle_alpha 90.00
  _cell_angle_beta 112.11
  _cell_angle_gamma 90.00
  _cell_formula_units_Z 4
  _symmetry_space_group_name_H-M 'C C '
  _symmetry_Int_Tables_number 9
loop_
  _symmetry_equiv_pos_as_xyz
    1 x,y,z
    2 x,-y,1/2+z
    3 1/2+x,1/2+y,z
    4 1/2+x,1/2-y,1/2+z
loop_
  _atom_site_label
  _atom_site_fract_x
  _atom_site_fract_y
  _atom_site_fract_z
```

|        |          |          |          |      |
|--------|----------|----------|----------|------|
| C1     | -0.20623 | 0.06553  | -0.01179 | # 1  |
| N2     | -0.28797 | 0.15774  | 0.04482  | # 2  |
| H*3    | -0.35351 | 0.10424  | 0.09856  | # 3  |
| H*4    | -0.28861 | 0.27920  | 0.03737  | # 4  |
| N5     | -0.11432 | 0.10341  | -0.08472 | # 5  |
| H*6    | -0.09519 | 0.21869  | -0.10693 | # 6  |
| H*7    | -0.06007 | 0.01244  | -0.12035 | # 7  |
| N8     | -0.22033 | -0.11505 | 0.01083  | # 8  |
| O9     | -0.14446 | -0.20120 | -0.04168 | # 9  |
| O10    | -0.30572 | -0.15075 | 0.07862  | # 10 |
| #XC1   | -0.20622 | 0.06562  | -0.01181 | # 11 |
| #XN2   | -0.29181 | 0.14172  | 0.04882  | # 12 |
| #XH*3  | -0.37545 | 0.12364  | 0.11411  | # 13 |
| #XH*4  | -0.28932 | 0.29751  | 0.03671  | # 14 |
| #XN5   | -0.11311 | 0.08582  | -0.08450 | # 15 |
| #XH*6  | -0.09172 | 0.23569  | -0.11070 | # 16 |
| #XH*7  | -0.03622 | 0.01751  | -0.13896 | # 17 |
| #XN8   | -0.21965 | -0.10628 | 0.00974  | # 18 |
| #XO9   | -0.15454 | -0.21801 | -0.03286 | # 19 |
| #XO10  | -0.29868 | -0.17291 | 0.07468  | # 20 |
| N'1+   | 0.33341  | -0.08986 | 0.78751  | # 21 |
| N2+    | 0.17291  | -0.02545 | 0.77521  | # 22 |
| O3+    | 0.08958  | -0.10951 | 0.82767  | # 23 |
| O4+    | 0.12295  | 0.10943  | 0.72759  | # 24 |
| N5+    | 0.39931  | -0.03411 | 0.69399  | # 25 |
| O6+    | 0.30455  | 0.01487  | 0.57972  | # 26 |
| O7+    | 0.56214  | -0.05102 | 0.73045  | # 27 |
| #XN'1+ | 0.33334  | -0.08977 | 0.78743  | # 28 |
| #XN2+  | 0.17217  | -0.02543 | 0.77648  | # 29 |
| #XO3+  | 0.08579  | -0.10176 | 0.81797  | # 30 |
| #XO4+  | 0.10932  | 0.10509  | 0.73324  | # 31 |
| #XN5+  | 0.40082  | -0.03510 | 0.69358  | # 32 |
| #XO6+  | 0.32224  | 0.01406  | 0.57860  | # 33 |
| #XO7+  | 0.55211  | -0.04122 | 0.72469  | # 34 |
| #XLP1+ | 0.39972  | 0.02519  | 0.85517  | # 35 |
| #XLP1- | 0.25228  | -0.18607 | 0.70325  | # 36 |
| #XLP2+ | 0.23723  | 0.02353  | 0.87030  | # 37 |
| #XLP2- | 0.06453  | -0.08917 | 0.68581  | # 38 |
| #XLP5+ | 0.45907  | 0.09138  | 0.72901  | # 39 |
| #XLP5- | 0.38771  | -0.15004 | 0.65787  | # 40 |
| #END   |          |          |          |      |

**S18.** Optimized crystal structure coordinates for formamidine – dinitramic acid (cocrystal form).

```
data_05695_-4.53068E+01
_chemical_name_systematic
;RAS NH3 PVDZ
```

```
E(total)=-4.53068E+01 E(coul)=-2.90565E+01 E(vdW)=-1.62503E+01 Density= 1.72948
;
_cell_length_a 7.571
_cell_length_b 6.388
```

```

_cell_length_c 7.724
_cell_angle_alpha 99.02
_cell_angle_beta 68.08
_cell_angle_gamma 122.99
_cell_formula_units_Z 2
_symmetry_space_group_name_H-M 'P -1 '
_symmetry_Int_Tables_number 2
loop_
_symmetry_equiv_pos_as_xyz
  1 x,y,z
  2 -x,-y,-z
loop_
_atom_site_label
_atom_site_fract_x
_atom_site_fract_y
_atom_site_fract_z
C1      0.29288  0.50298 -0.62210      # 1
N2      0.30824  0.68492 -0.71132      # 2
H*3     0.32862  0.67424 -0.84842      # 3
H*4     0.22804  0.77124 -0.63296      # 4
N'5     0.21313  0.46921 -0.44367      # 5
H*6     0.22335  0.33231 -0.40421      # 6
H7      0.36070  0.39720 -0.71915      # 7
#XC1    0.26472  0.60693 -0.61145      # 8
#XN2    0.29085  0.69592 -0.71451      # 9
#XH*3   0.31701  0.68194 -0.80013      # 10
#XH*4   0.25750  0.75189 -0.67779      # 11
#XN'5   0.20963  0.51369 -0.45810      # 12
#XH*6   0.21791  0.32077 -0.38726      # 13
#XH7    0.38485  0.36530 -0.73064      # 14
N1+     0.13100  0.79063 -0.18841      # 15
N'2+    0.24208  0.82204 -0.05917      # 16
O3+     0.26634  0.98511  0.04886      # 17
O4+     0.28767  0.66280 -0.07297      # 18
N'5+    0.18509  1.01323 -0.27741      # 19
O6+     0.20526  1.19001 -0.18505      # 20
O7+     0.19206  0.98356 -0.43912      # 21
H*8+    0.16716  0.68477 -0.29233      # 22
#XN1+   0.03996  0.75286 -0.13922      # 23
#XN'2+  0.17972  0.77571 -0.09797      # 24
#XO3+   0.30582  0.92712  0.02189      # 25
#XO4+   0.27531  0.69009 -0.13899      # 26
#XN'5+  0.13936  0.91111 -0.25253      # 27
#XO6+   0.23152  1.17638 -0.26265      # 28
#XO7+   0.20693  0.91950 -0.40086      # 29
#XH*8+  0.17628  0.67924 -0.30376      # 30
#XLP1+  0.25781  0.97978 -0.22914      # 31
#XLP1-  0.14466  0.84377 -0.17326      # 32
#XLP2+  0.33229  0.87064 -0.03819      # 33
#XLP2-  0.14688  0.81319 -0.09950      # 34
#XLP3+  0.18305  0.94610 -0.03385      # 35
#XLP3-  0.15171  0.71181  0.10640      # 36

```

```

#XLP4+  0.29531  0.73698 -0.04804      # 37
#XLP4-  0.22810  0.67441 -0.18340      # 38
#XLP5+  0.25761  1.12117 -0.32417      # 39
#XLP5-  0.12222  0.89594 -0.19395      # 40
#XLP6+  0.15756  1.03160 -0.13145      # 41
#XLP6-  0.04688  1.06353 -0.29509      # 42
#XLP7+  0.20557  1.03808 -0.39175      # 43
#XLP7-  0.18047  0.83420 -0.36580      # 44
#END

```

```

data_09895_-4.52759E+01
  _chemical_name_systematic
;RAS NH3 PVDZ

```

E(total)=-4.52759E+01 E(coul)=-2.83817E+01 E(vdW)=-1.68941E+01 Density= 1.77092

```

;
  _cell_length_a  8.929
  _cell_length_b  6.026
  _cell_length_c 12.646
  _cell_angle_alpha  90.00
  _cell_angle_beta  123.60
  _cell_angle_gamma  90.00
  _cell_formula_units_Z  4
  _symmetry_space_group_name_H-M 'P 21/C '
  _symmetry_Int_Tables_number 14
loop_
  _symmetry_equiv_pos_as_xyz
    1 x,y,z
    2 -x,1/2+y,1/2-z
    3 -x,-y,-z
    4 x,1/2-y,1/2+z
loop_
  _atom_site_label
  _atom_site_fract_x
  _atom_site_fract_y
  _atom_site_fract_z
C1      0.03352  0.73315 -0.35552      # 1
N2      -0.06797  0.74768 -0.48554      # 2
H*3     -0.17861  0.84437 -0.52896      # 3
H*4     -0.00347  0.72613 -0.53008      # 4
N'5     0.19543  0.66069 -0.29316      # 5
H*6     0.24564  0.65493 -0.19860      # 6
H7      -0.04028  0.78418 -0.31283      # 7
#XC1    0.03152  0.72088 -0.41814      # 8
#XN2    -0.06873  0.76110 -0.49938      # 9
#XH*3   -0.13937  0.81281 -0.51747      # 10
#XH*4   -0.04173  0.74386 -0.52709      # 11
#XN'5   0.17789  0.66399 -0.32461      # 12
#XH*6   0.26187  0.64843 -0.18735      # 13
#XH7    -0.04923  0.78241 -0.29119      # 14
N1+     0.40384 -0.09079  0.10939      # 15
N'2+    0.58575 -0.11649  0.22156      # 16

```

|        |         |          |          |      |
|--------|---------|----------|----------|------|
| O3+    | 0.70674 | -0.14633 | 0.20725  | # 17 |
| O4+    | 0.59169 | -0.09221 | 0.31953  | # 18 |
| N'5+   | 0.34570 | -0.23466 | 0.00056  | # 19 |
| O6+    | 0.44947 | -0.27298 | -0.02961 | # 20 |
| O7+    | 0.18896 | -0.29047 | -0.05125 | # 21 |
| H*8+   | 0.31709 | -0.11450 | 0.13711  | # 22 |
| #XN1+  | 0.40770 | -0.00583 | 0.09045  | # 23 |
| #XN'2+ | 0.51650 | -0.07899 | 0.18673  | # 24 |
| #XO3+  | 0.69832 | -0.15919 | 0.24799  | # 25 |
| #XO4+  | 0.52096 | -0.12005 | 0.27015  | # 26 |
| #XN'5+ | 0.34649 | -0.16267 | 0.03022  | # 27 |
| #XO6+  | 0.38536 | -0.31326 | -0.04015 | # 28 |
| #XO7+  | 0.23293 | -0.26184 | 0.00497  | # 29 |
| #XH*8+ | 0.31013 | -0.12223 | 0.14056  | # 30 |
| #XLP1+ | 0.42806 | -0.24646 | 0.08362  | # 31 |
| #XLP1- | 0.42625 | -0.11157 | 0.09968  | # 32 |
| #XLP2+ | 0.65094 | -0.17778 | 0.26534  | # 33 |
| #XLP2- | 0.49967 | -0.07372 | 0.14751  | # 34 |
| #XLP3+ | 0.58411 | -0.11617 | 0.13657  | # 35 |
| #XLP3- | 0.70368 | 0.03833  | 0.28765  | # 36 |
| #XLP4+ | 0.62118 | -0.11314 | 0.30034  | # 37 |
| #XLP4- | 0.45399 | -0.10426 | 0.22814  | # 38 |
| #XLP5+ | 0.33639 | -0.33263 | -0.02426 | # 39 |
| #XLP5- | 0.39578 | -0.12487 | 0.05186  | # 40 |
| #XLP6+ | 0.47676 | -0.16901 | 0.03773  | # 41 |
| #XLP6- | 0.26208 | -0.17906 | -0.11891 | # 42 |
| #XLP7+ | 0.24313 | -0.29924 | -0.04771 | # 43 |
| #XLP7- | 0.25337 | -0.20302 | 0.04343  | # 44 |
| #END   |         |          |          |      |

data\_01589\_-4.51843E+01  
 \_chemical\_name\_systematic  
 ;RAS NH3 PVDZ

E(total)=-4.51843E+01 E(coul)=-2.86509E+01 E(vdW)=-1.65334E+01 Density= 1.75010  
 ;

\_cell\_length\_a 6.878  
 \_cell\_length\_b 7.892  
 \_cell\_length\_c 10.565  
 \_cell\_angle\_alpha 90.00  
 \_cell\_angle\_beta 90.00  
 \_cell\_angle\_gamma 90.00  
 \_cell\_formula\_units\_Z 4  
 \_symmetry\_space\_group\_name\_H-M 'P NA21 '  
 \_symmetry\_Int\_Tables\_number 33  
 loop\_  
 \_symmetry\_equiv\_pos\_as\_xyz  
 1 x,y,z  
 2 1/2-x,1/2+y,1/2+z  
 3 1/2+x,1/2-y,z  
 4 -x,-y,1/2+z  
 loop\_

| _atom_site_label | _atom_site_fract_x | _atom_site_fract_y | _atom_site_fract_z |      |
|------------------|--------------------|--------------------|--------------------|------|
| C1               | 0.10027            | 0.87584            | 0.49707            | # 1  |
| N2               | 0.01805            | 0.98294            | 0.58427            | # 2  |
| H*3              | -0.01514           | 1.10247            | 0.55842            | # 3  |
| H*4              | -0.06351           | 0.92963            | 0.65339            | # 4  |
| N'5              | 0.10203            | 0.71481            | 0.51218            | # 5  |
| H*6              | 0.17552            | 0.65802            | 0.43995            | # 6  |
| H7               | 0.16697            | 0.94320            | 0.41670            | # 7  |
| #XC1             | 0.03991            | 0.88358            | 0.55993            | # 8  |
| #XN2             | -0.00571           | 0.98813            | 0.59250            | # 9  |
| #XH*3            | -0.00953           | 1.06115            | 0.57035            | # 10 |
| #XH*4            | -0.04453           | 0.96541            | 0.63284            | # 11 |
| #XN'5            | 0.07728            | 0.73469            | 0.53547            | # 12 |
| #XH*6            | 0.18076            | 0.64135            | 0.43647            | # 13 |
| #XH7             | 0.19868            | 0.94756            | 0.39413            | # 14 |
| N1+              | 0.02472            | 0.47073            | 0.22001            | # 15 |
| N'2+             | 0.16471            | 0.37310            | 0.29354            | # 16 |
| O3+              | 0.26876            | 0.44692            | 0.36668            | # 17 |
| O4+              | 0.14977            | 0.22135            | 0.27427            | # 18 |
| N'5+             | 0.08552            | 0.63298            | 0.16731            | # 19 |
| O6+              | 0.18389            | 0.72544            | 0.23139            | # 20 |
| O7+              | 0.01692            | 0.65735            | 0.06248            | # 21 |
| H*8+             | -0.01957           | 0.39632            | 0.14631            | # 22 |
| #XN1+            | -0.03006           | 0.49119            | 0.25807            | # 23 |
| #XN'2+           | 0.09232            | 0.39475            | 0.27262            | # 24 |
| #XO3+            | 0.27069            | 0.38227            | 0.34361            | # 25 |
| #XO4+            | 0.12127            | 0.27279            | 0.23442            | # 26 |
| #XN'5+           | 0.03624            | 0.57879            | 0.18322            | # 27 |
| #XO6+            | 0.16746            | 0.72108            | 0.17903            | # 28 |
| #XO7+            | 0.02626            | 0.58461            | 0.08295            | # 29 |
| #XH*8+           | -0.01918           | 0.38917            | 0.13798            | # 30 |
| #XLP1+           | 0.14819            | 0.53899            | 0.19014            | # 31 |
| #XLP1-           | 0.05458            | 0.49714            | 0.23055            | # 32 |
| #XLP2+           | 0.25029            | 0.33890            | 0.30069            | # 33 |
| #XLP2-           | 0.07814            | 0.44795            | 0.27612            | # 34 |
| #XLP3+           | 0.16551            | 0.50355            | 0.31997            | # 35 |
| #XLP3-           | 0.13871            | 0.29925            | 0.40279            | # 36 |
| #XLP4+           | 0.18483            | 0.26522            | 0.29242            | # 37 |
| #XLP4-           | 0.06544            | 0.30907            | 0.20977            | # 38 |
| #XLP5+           | 0.14652            | 0.67943            | 0.13527            | # 39 |
| #XLP5-           | 0.04386            | 0.56043            | 0.22148            | # 40 |
| #XLP6+           | 0.13010            | 0.61978            | 0.26352            | # 41 |
| #XLP6-           | -0.00696           | 0.77733            | 0.17056            | # 42 |
| #XLP7+           | 0.06013            | 0.67449            | 0.09361            | # 43 |
| #XLP7-           | -0.00074           | 0.52626            | 0.10427            | # 44 |
| #END             |                    |                    |                    |      |

data\_04735\_-4.51129E+01  
\_chemical\_name\_systematic



;RAS NH3 PVDZ

E(total)=-4.51129E+01 E(coul)=-2.92054E+01 E(vdW)=-1.59075E+01 Density= 1.70034

;

\_cell\_length\_a 11.597  
\_cell\_length\_b 6.497  
\_cell\_length\_c 8.114  
\_cell\_angle\_alpha 90.00  
\_cell\_angle\_beta 105.09  
\_cell\_angle\_gamma 90.00  
\_cell\_formula\_units\_Z 4  
\_symmetry\_space\_group\_name\_H-M 'P 21/A '

\_symmetry\_Int\_Tables\_number 14  
loop\_

\_symmetry\_equiv\_pos\_as\_xyz

- 1 x,y,z
- 2 1/2-x,1/2+y,-z
- 3 -x,-y,-z
- 4 1/2+x,1/2-y,z

loop\_

\_atom\_site\_label

\_atom\_site\_fract\_x

\_atom\_site\_fract\_y

\_atom\_site\_fract\_z

|        |         |         |          |      |
|--------|---------|---------|----------|------|
| C1     | 0.62049 | 0.63894 | -0.01211 | # 1  |
| N2     | 0.64788 | 0.46275 | 0.08336  | # 2  |
| H*3    | 0.62644 | 0.45303 | 0.19582  | # 3  |
| H*4    | 0.65083 | 0.32979 | 0.01953  | # 4  |
| N'5    | 0.61759 | 0.64409 | -0.17095 | # 5  |
| H*6    | 0.59995 | 0.78963 | -0.21754 | # 6  |
| H7     | 0.60489 | 0.77246 | 0.06299  | # 7  |
| #XC1   | 0.63401 | 0.52046 | -0.01228 | # 8  |
| #XN2   | 0.64288 | 0.43521 | 0.08497  | # 9  |
| #XH*3  | 0.63312 | 0.44864 | 0.15610  | # 10 |
| #XH*4  | 0.64924 | 0.36284 | 0.05741  | # 11 |
| #XN'5  | 0.62293 | 0.59618 | -0.15453 | # 12 |
| #XH*6  | 0.59871 | 0.79975 | -0.23332 | # 13 |
| #XH7   | 0.60512 | 0.82131 | 0.07172  | # 14 |
| N1+    | 0.33452 | 0.68955 | 0.35500  | # 15 |
| N'2+   | 0.36434 | 0.63587 | 0.53558  | # 16 |
| O3+    | 0.36586 | 0.77023 | 0.63824  | # 17 |
| O4+    | 0.37871 | 0.45113 | 0.55825  | # 18 |
| N'5+   | 0.38372 | 0.87840 | 0.30407  | # 19 |
| O6+    | 0.38662 | 1.03016 | 0.39012  | # 20 |
| O7+    | 0.41121 | 0.85802 | 0.16985  | # 21 |
| H*8+   | 0.36183 | 0.57060 | 0.29191  | # 22 |
| #XN1+  | 0.28464 | 0.70909 | 0.34146  | # 23 |
| #XN'2+ | 0.34076 | 0.63520 | 0.46442  | # 24 |
| #XO3+  | 0.38469 | 0.68956 | 0.64197  | # 25 |
| #XO4+  | 0.38520 | 0.49140 | 0.49241  | # 26 |
| #XN'5+ | 0.35449 | 0.80696 | 0.30046  | # 27 |
| #XO6+  | 0.40995 | 1.00575 | 0.34014  | # 28 |

```

#XO7+    0.40844  0.78241  0.21463    # 29
#XH*8+   0.36740  0.56008  0.28798    # 30
#XLP1+   0.40636  0.79346  0.39287    # 31
#XLP1-   0.34077  0.73116  0.37476    # 32
#XLP2+   0.40316  0.62171  0.60883    # 33
#XLP2-   0.32840  0.69376  0.44101    # 34
#XLP3+   0.34045  0.79422  0.51568    # 35
#XLP3-   0.29250  0.57464  0.62566    # 36
#XLP4+   0.38178  0.51648  0.58189    # 37
#XLP4-   0.37072  0.51108  0.42484    # 38
#XLP5+   0.42855  0.93951  0.30547    # 39
#XLP5-   0.33679  0.79873  0.34081    # 40
#XLP6+   0.34912  0.90268  0.41214    # 41
#XLP6-   0.32814  1.02080  0.19977    # 42
#XLP7+   0.41229  0.89843  0.21729    # 43
#XLP7-   0.38691  0.71378  0.23135    # 44
#END

```

```

data_08361_-4.50169E+01
  _chemical_name_systematic
;RAS NH3 PVDZ

```

E(total)=-4.50169E+01 E(coul)=-2.83630E+01 E(vdW)=-1.66540E+01 Density= 1.72766

```

;
  _cell_length_a  6.359
  _cell_length_b 11.620
  _cell_length_c  7.927
  _cell_angle_alpha  90.00
  _cell_angle_beta   82.71
  _cell_angle_gamma  90.00
  _cell_formula_units_Z 4
  _symmetry_space_group_name_H-M 'P 21/A '
  _symmetry_Int_Tables_number 14
loop_
  _symmetry_equiv_pos_as_xyz
    1 x,y,z
    2 1/2-x,1/2+y,-z
    3 -x,-y,-z
    4 1/2+x,1/2-y,z
loop_
  _atom_site_label
  _atom_site_fract_x
  _atom_site_fract_y
  _atom_site_fract_z
C1      0.18052  0.62275  0.53754    # 1
N2      0.00425  0.64536  0.45954    # 2
H*3     0.00765  0.62812  0.33456    # 3
H*4     -0.13822 0.64141  0.53255    # 4
N'5     0.17201  0.61529  0.69948    # 5
H*6     0.31974  0.60234  0.73295    # 6
H7      0.32652  0.61506  0.44720    # 7
#XC1    0.05698  0.63132  0.54913    # 8

```

|        |          |         |          |      |
|--------|----------|---------|----------|------|
| #XN2   | -0.02307 | 0.63967 | 0.45688  | # 9  |
| #XH*3  | -0.00144 | 0.63308 | 0.37866  | # 10 |
| #XH*4  | -0.10071 | 0.64225 | 0.49135  | # 11 |
| #XN'5  | 0.12355  | 0.61914 | 0.68715  | # 12 |
| #XH*6  | 0.32889  | 0.60105 | 0.74818  | # 13 |
| #XH7   | 0.37735  | 0.61731 | 0.43614  | # 14 |
| N1+    | 0.69347  | 0.15730 | 0.08214  | # 15 |
| N'2+   | 0.88234  | 0.11202 | 0.14549  | # 16 |
| O3+    | 1.04624  | 0.11004 | 0.05111  | # 17 |
| O4+    | 0.84867  | 0.08623 | 0.29557  | # 18 |
| N'5+   | 0.65494  | 0.12705 | -0.08974 | # 19 |
| O6+    | 0.80253  | 0.12616 | -0.20099 | # 20 |
| O7+    | 0.46718  | 0.11145 | -0.09907 | # 21 |
| H*8+   | 0.56519  | 0.13038 | 0.16330  | # 22 |
| #XN1+  | 0.71266  | 0.20551 | 0.07552  | # 23 |
| #XN'2+ | 0.80884  | 0.13950 | 0.14090  | # 24 |
| #XO3+  | 1.01632  | 0.08772 | 0.11292  | # 25 |
| #XO4+  | 0.77520  | 0.08794 | 0.25175  | # 26 |
| #XN'5+ | 0.64780  | 0.15014 | -0.02569 | # 27 |
| #XO6+  | 0.71986  | 0.10732 | -0.19375 | # 28 |
| #XO7+  | 0.50236  | 0.10598 | -0.03050 | # 29 |
| #XH*8+ | 0.55397  | 0.12496 | 0.17002  | # 30 |
| #XLP1+ | 0.72622  | 0.09403 | -0.01285 | # 31 |
| #XLP1- | 0.72591  | 0.15235 | 0.04985  | # 32 |
| #XLP2+ | 0.94491  | 0.06946 | 0.15899  | # 33 |
| #XLP2- | 0.80428  | 0.15618 | 0.09271  | # 34 |
| #XLP3+ | 0.91763  | 0.14482 | 0.01939  | # 35 |
| #XLP3- | 1.01931  | 0.16735 | 0.22459  | # 36 |
| #XLP4+ | 0.89461  | 0.08526 | 0.24528  | # 37 |
| #XLP4- | 0.70642  | 0.10792 | 0.22912  | # 38 |
| #XLP5+ | 0.64694  | 0.08916 | -0.14925 | # 39 |
| #XLP5- | 0.70586  | 0.16269 | -0.00910 | # 40 |
| #XLP6+ | 0.81593  | 0.15154 | -0.08581 | # 41 |
| #XLP6- | 0.60100  | 0.19500 | -0.20814 | # 42 |
| #XLP7+ | 0.53649  | 0.10894 | -0.12517 | # 43 |
| #XLP7- | 0.51638  | 0.12049 | 0.03253  | # 44 |
| #END   |          |         |          |      |

**S19.** Optimized crystal structure coordinates for azidoformamidine – dinitramic acid (cocrystal form).

```
data_N3F_DNH_1
  _chemical_name_systematic
;RAS NH3 PVDZ
```

```
E(total)=-4.15441E+01 E(coul)=-2.23188E+01 E(vdW)=-1.92253E+01 Density= 1.73309
;
  _cell_length_a 6.658
  _cell_length_b 13.383
  _cell_length_c 10.250
  _cell_angle_alpha 90.00
  _cell_angle_beta 53.73
```

```

_cell_angle_gamma 90.00
_cell_formula_units_Z 4
_symmetry_space_group_name_H-M 'P 21/A '
_symmetry_Int_Tables_number 14
loop_
_symmetry_equiv_pos_as_xyz
  1 x,y,z
  2 1/2-x,1/2+y,-z
  3 -x,-y,-z
  4 1/2+x,1/2-y,z
loop_
_atom_site_label
_atom_site_fract_x
_atom_site_fract_y
_atom_site_fract_z
C1 -0.13353 0.24797 0.09056 # 1
N'2 -0.04395 0.18509 -0.02543 # 2
H*3 -0.06937 0.11321 0.01459 # 3
N4 -0.25929 0.23067 0.25396 # 4
N'5 -0.11948 0.35297 0.06238 # 5
N6 -0.01711 0.37651 -0.08166 # 6
N'7 0.07197 0.40732 -0.20756 # 7
H*8 -0.24362 0.16196 0.28764 # 8
H*9 -0.27799 0.28829 0.32415 # 9
#XC1 -0.15900 0.25793 0.12577 # 10
#XN'2 -0.03421 0.19545 -0.04788 # 11
#XH*3 -0.05963 0.11331 0.00260 # 12
#XN4 -0.21559 0.23443 0.23258 # 13
#XN'5 -0.13107 0.35613 0.08352 # 14
#XN6 -0.02188 0.36917 -0.07587 # 15
#XN'7 0.06838 0.41966 -0.19749 # 16
#XH*8 -0.24193 0.16436 0.28907 # 17
#XH*9 -0.28235 0.29179 0.33223 # 18
#XLP1+ -0.09649 0.26371 0.07182 # 19
#XLP1- -0.16361 0.25499 0.09928 # 20
#XLP2+ -0.05881 0.18476 0.00786 # 21
#XLP2- -0.03036 0.19140 -0.03601 # 22
#XLP4+ -0.16165 0.22689 0.25367 # 23
#XLP4- -0.36452 0.22634 0.28243 # 24
#XLP5+ -0.06423 0.36069 0.07772 # 25
#XLP5- -0.20425 0.35930 0.09707 # 26
#XLP6+ -0.02899 0.37927 -0.07212 # 27
#XLP6- -0.01724 0.38149 -0.07142 # 28
#XLP7+ 0.14818 0.41921 -0.23248 # 29
#XLP7- 0.02005 0.41834 -0.21930 # 30
N1+ 0.77241 -0.10851 0.34470 # 31
N'2+ 0.82055 -0.14876 0.45591 # 32
O3+ 0.76131 -0.09988 0.57223 # 33
O4+ 0.90766 -0.23281 0.41795 # 34
N'5+ 0.81943 -0.00276 0.30320 # 35
O6+ 0.76011 0.05659 0.40856 # 36
O7+ 0.90579 0.01213 0.16176 # 37

```

|        |         |          |         |      |
|--------|---------|----------|---------|------|
| H*8+   | 0.87897 | -0.14805 | 0.23929 | # 38 |
| #XN1+  | 0.66570 | -0.11050 | 0.38269 | # 39 |
| #XN'2+ | 0.78453 | -0.14592 | 0.41747 | # 40 |
| #XO3+  | 0.82622 | -0.13260 | 0.53927 | # 41 |
| #XO4+  | 0.91891 | -0.20422 | 0.36681 | # 42 |
| #XN'5+ | 0.78374 | -0.04253 | 0.30932 | # 43 |
| #XO6+  | 0.82477 | 0.05774  | 0.34018 | # 44 |
| #XO7+  | 0.91757 | -0.02904 | 0.18358 | # 45 |
| #XH*8+ | 0.89460 | -0.15096 | 0.22853 | # 46 |
| #XLP1+ | 0.87899 | -0.04739 | 0.33680 | # 47 |
| #XLP1- | 0.76800 | -0.09036 | 0.36552 | # 48 |
| #XLP2+ | 0.89246 | -0.15479 | 0.47893 | # 49 |
| #XLP2- | 0.74366 | -0.11919 | 0.42295 | # 50 |
| #XLP3+ | 0.72216 | -0.07960 | 0.49841 | # 51 |
| #XLP3- | 0.67777 | -0.20672 | 0.58075 | # 52 |
| #XLP4+ | 0.88817 | -0.20507 | 0.45050 | # 53 |
| #XLP4- | 0.89422 | -0.19019 | 0.32807 | # 54 |
| #XLP5+ | 0.89100 | 0.03653  | 0.27882 | # 55 |
| #XLP5- | 0.74317 | -0.05600 | 0.35686 | # 56 |
| #XLP6+ | 0.72166 | -0.01430 | 0.43011 | # 57 |
| #XLP6- | 0.67572 | 0.06186  | 0.29983 | # 58 |
| #XLP7+ | 0.88641 | 0.02486  | 0.21000 | # 59 |
| #XLP7- | 0.89328 | -0.06817 | 0.20044 | # 60 |
| #END   |         |          |         |      |

data\_N3F\_DNH\_2  
\_chemical\_name\_systematic  
;RAS NH3 PVDZ

E(total)=-4.15382E+01 E(coul)=-2.31785E+01 E(vdW)=-1.83596E+01 Density= 1.68956

```

;
_cell_length_a  9.661
_cell_length_b  8.781
_cell_length_c  5.394
_cell_angle_alpha  97.08
_cell_angle_beta  110.01
_cell_angle_gamma  113.07
_cell_formula_units_Z  2
_symmetry_space_group_name_H-M 'P -1 '
_symmetry_Int_Tables_number  2
loop_
_symmetry_equiv_pos_as_xyz
  1 x,y,z
  2 -x,-y,-z
loop_
_atom_site_label
_atom_site_fract_x
_atom_site_fract_y
_atom_site_fract_z
C1      0.42644  0.20223  0.01043      # 1
N'2     0.54656  0.19546  0.19788      # 2
H*3     0.50572  0.11522  0.30683      # 3

```

|        |         |         |          |      |
|--------|---------|---------|----------|------|
| N4     | 0.25804 | 0.11487 | -0.06210 | # 4  |
| N'5    | 0.45486 | 0.30632 | -0.16775 | # 5  |
| N6     | 0.60344 | 0.38583 | -0.12598 | # 6  |
| N'7    | 0.73323 | 0.46450 | -0.10830 | # 7  |
| H*8    | 0.22289 | 0.06204 | 0.07580  | # 8  |
| H*9    | 0.18438 | 0.15822 | -0.18079 | # 9  |
| #XC1   | 0.39001 | 0.19694 | -0.02854 | # 10 |
| #XN'2  | 0.56980 | 0.21026 | 0.18705  | # 11 |
| #XH*3  | 0.51808 | 0.12087 | 0.31468  | # 12 |
| #XN4   | 0.27944 | 0.14401 | -0.03224 | # 13 |
| #XN'5  | 0.43293 | 0.30278 | -0.18292 | # 14 |
| #XN6   | 0.59753 | 0.37638 | -0.11667 | # 15 |
| #XN'7  | 0.72265 | 0.47391 | -0.13344 | # 16 |
| #XH*8  | 0.22133 | 0.06529 | 0.07292  | # 17 |
| #XH*9  | 0.17598 | 0.15901 | -0.19067 | # 18 |
| #XLP1+ | 0.44513 | 0.23843 | 0.01306  | # 19 |
| #XLP1- | 0.41793 | 0.19084 | -0.02759 | # 20 |
| #XLP2+ | 0.51198 | 0.18705 | 0.18645  | # 21 |
| #XLP2- | 0.55730 | 0.20915 | 0.19781  | # 22 |
| #XLP4+ | 0.25614 | 0.16997 | 0.02738  | # 23 |
| #XLP4- | 0.23062 | 0.04846 | -0.14288 | # 24 |
| #XLP5+ | 0.43744 | 0.34692 | -0.13467 | # 25 |
| #XLP5- | 0.42036 | 0.26211 | -0.25036 | # 26 |
| #XLP6+ | 0.59367 | 0.38148 | -0.14087 | # 27 |
| #XLP6- | 0.59266 | 0.39058 | -0.13491 | # 28 |
| #XLP7+ | 0.75753 | 0.52052 | -0.06566 | # 29 |
| #XLP7- | 0.74665 | 0.44318 | -0.17235 | # 30 |
| N1+    | 0.87172 | 0.25807 | 0.54938  | # 31 |
| N'2+   | 0.82014 | 0.11203 | 0.65842  | # 32 |
| O3+    | 0.92139 | 0.06729 | 0.77524  | # 33 |
| O4+    | 0.67622 | 0.05798 | 0.62628  | # 34 |
| N'5+   | 0.98092 | 0.27123 | 0.41296  | # 35 |
| O6+    | 1.09371 | 0.23790 | 0.51217  | # 36 |
| O7+    | 0.94596 | 0.32506 | 0.21447  | # 37 |
| H*8+   | 0.76628 | 0.25415 | 0.41054  | # 38 |
| #XN1+  | 0.91471 | 0.31537 | 0.64858  | # 39 |
| #XN'2+ | 0.83125 | 0.17736 | 0.63888  | # 40 |
| #XO3+  | 0.85106 | 0.03584 | 0.72722  | # 41 |
| #XO4+  | 0.70021 | 0.09817 | 0.55071  | # 42 |
| #XN'5+ | 0.94511 | 0.29009 | 0.46505  | # 43 |
| #XO6+  | 1.06068 | 0.24339 | 0.40720  | # 44 |
| #XO7+  | 0.89313 | 0.28918 | 0.25618  | # 45 |
| #XH*8+ | 0.75516 | 0.24987 | 0.39294  | # 46 |
| #XLP1+ | 0.90775 | 0.18351 | 0.44157  | # 47 |
| #XLP1- | 0.89937 | 0.24624 | 0.56067  | # 48 |
| #XLP2+ | 0.78931 | 0.02918 | 0.64448  | # 49 |
| #XLP2- | 0.88092 | 0.21165 | 0.65002  | # 50 |
| #XLP3+ | 0.95022 | 0.16937 | 0.71111  | # 51 |
| #XLP3- | 0.81938 | 0.11442 | 0.90037  | # 52 |
| #XLP4+ | 0.72333 | 0.05016 | 0.65147  | # 53 |
| #XLP4- | 0.72114 | 0.15582 | 0.51719  | # 54 |
| #XLP5+ | 1.00000 | 0.23778 | 0.32283  | # 55 |

```

#XLP5- 0.95051 0.28055 0.54378 # 56
#XLP6+ 1.02212 0.24057 0.60133 # 57
#XLP6- 1.11515 0.40727 0.44881 # 58
#XLP7+ 0.97654 0.30087 0.26489 # 59
#XLP7- 0.85551 0.28887 0.31204 # 60
#END

```

```

data_N3F_DNH_3
  _chemical_name_systematic
;RAS NH3 PVDZ

```

E(total)=-4.14380E+01 E(coul)=-2.30428E+01 E(vdW)=-1.83952E+01 Density= 1.73057

```

;
  _cell_length_a 9.307
  _cell_length_b 15.168
  _cell_length_c 5.469
  _cell_angle_alpha 90.00
  _cell_angle_beta 72.76
  _cell_angle_gamma 90.00
  _cell_formula_units_Z 4
  _symmetry_space_group_name_H-M 'P 21/A '
  _symmetry_Int_Tables_number 14

```

loop\_

\_symmetry\_equiv\_pos\_as\_xyz

```

1 x,y,z
2 1/2-x,1/2+y,-z
3 -x,-y,-z
4 1/2+x,1/2-y,z

```

loop\_

\_atom\_site\_label

\_atom\_site\_fract\_x

\_atom\_site\_fract\_y

\_atom\_site\_fract\_z

```

C1      0.05338 -0.13807 0.50985 # 1
N'2     0.17114 -0.13351 0.58457 # 2
H*3     0.16258 -0.17268 0.73982 # 3
N4      -0.07402 -0.18873 0.60459 # 4
N'5     0.04104 -0.08883 0.29477 # 5
N6      0.15360 -0.04321 0.18852 # 6
N'7     0.24838 0.00085 0.07602 # 7
H*8     -0.09256 -0.21416 0.78174 # 8
H*9     -0.16616 -0.17277 0.55220 # 9
#XC1    0.02029 -0.14276 0.50582 # 10
#XN'2   0.18865 -0.12544 0.55020 # 11
#XH*3   0.17216 -0.16930 0.73549 # 12
#XN4    -0.06843 -0.17341 0.61218 # 13
#XN'5   0.02077 -0.09173 0.30076 # 14
#XN6    0.15166 -0.04791 0.20430 # 15
#XN'7   0.23403 0.00457 0.06007 # 16
#XH*8   -0.09569 -0.21270 0.78010 # 17
#XH*9   -0.17477 -0.17290 0.55022 # 18
#XLP1+  0.05422 -0.11979 0.49198 # 19

```

|        |          |          |          |      |
|--------|----------|----------|----------|------|
| #XLP1- | 0.05271  | -0.14436 | 0.48037  | # 20 |
| #XLP2+ | 0.13987  | -0.13931 | 0.60685  | # 21 |
| #XLP2- | 0.17539  | -0.12644 | 0.57320  | # 22 |
| #XLP4+ | -0.11006 | -0.16137 | 0.69310  | # 23 |
| #XLP4- | -0.06353 | -0.22280 | 0.55389  | # 24 |
| #XLP5+ | -0.00026 | -0.06980 | 0.34214  | # 25 |
| #XLP5- | 0.03278  | -0.11260 | 0.24746  | # 26 |
| #XLP6+ | 0.14653  | -0.04593 | 0.18315  | # 27 |
| #XLP6- | 0.14040  | -0.04154 | 0.18951  | # 28 |
| #XLP7+ | 0.24239  | 0.02935  | 0.09185  | # 29 |
| #XLP7- | 0.27754  | -0.00948 | -0.00022 | # 30 |
| N1+    | -0.52403 | 0.87724  | 0.27284  | # 31 |
| N'2+   | -0.42783 | 0.87670  | 0.44012  | # 32 |
| O3+    | -0.29895 | 0.85367  | 0.35315  | # 33 |
| O4+    | -0.49259 | 0.90518  | 0.65267  | # 34 |
| N'5+   | -0.51275 | 0.80419  | 0.09499  | # 35 |
| O6+    | -0.38997 | 0.77596  | -0.01675 | # 36 |
| O7+    | -0.63506 | 0.78353  | 0.07365  | # 37 |
| H*8+   | -0.63296 | 0.87983  | 0.38700  | # 38 |
| #XN1+  | -0.49942 | 0.90595  | 0.20491  | # 39 |
| #XN'2+ | -0.46810 | 0.88917  | 0.38681  | # 40 |
| #XO3+  | -0.33856 | 0.85744  | 0.45338  | # 41 |
| #XO4+  | -0.52873 | 0.88965  | 0.58480  | # 42 |
| #XN'5+ | -0.52824 | 0.83782  | 0.14239  | # 43 |
| #XO6+  | -0.44927 | 0.76291  | 0.00341  | # 44 |
| #XO7+  | -0.63062 | 0.80265  | 0.17068  | # 45 |
| #XH*8+ | -0.64306 | 0.87803  | 0.40052  | # 46 |
| #XLP1+ | -0.49312 | 0.81032  | 0.24397  | # 47 |
| #XLP1- | -0.49614 | 0.86568  | 0.24485  | # 48 |
| #XLP2+ | -0.40014 | 0.85713  | 0.52228  | # 49 |
| #XLP2- | -0.45538 | 0.88457  | 0.30512  | # 50 |
| #XLP3+ | -0.36645 | 0.85998  | 0.24811  | # 51 |
| #XLP3- | -0.34695 | 0.94116  | 0.48714  | # 52 |
| #XLP4+ | -0.45063 | 0.89117  | 0.59957  | # 53 |
| #XLP4- | -0.56311 | 0.89215  | 0.51987  | # 54 |
| #XLP5+ | -0.51142 | 0.76211  | 0.07002  | # 55 |
| #XLP5- | -0.49213 | 0.85319  | 0.15574  | # 56 |
| #XLP6+ | -0.40442 | 0.82755  | 0.09377  | # 57 |
| #XLP6- | -0.50317 | 0.80778  | -0.14776 | # 58 |
| #XLP7+ | -0.58437 | 0.77698  | 0.05603  | # 59 |
| #XLP7- | -0.63408 | 0.83155  | 0.23143  | # 60 |
| #END   |          |          |          |      |

data\_N3F\_DNH\_4  
\_chemical\_name\_systematic  
;RAS NH3 PVDZ

E(total)=-4.14356E+01 E(coul)=-2.27358E+01 E(vdW)=-1.86998E+01 Density= 1.70560

;

\_cell\_length\_a 17.940  
\_cell\_length\_b 5.369  
\_cell\_length\_c 16.923



```

_cell_angle_alpha 90.00
_cell_angle_beta 113.35
_cell_angle_gamma 90.00
_cell_formula_units_Z 8
_symmetry_space_group_name_H-M 'C 2/C '
_symmetry_Int_Tables_number 15
loop_
_symmetry_equiv_pos_as_xyz
  1 x,y,z
  2 -x,y,1/2-z
  3 -x,-y,-z
  4 x,-y,1/2+z
  5 1/2+x,1/2+y,z
  6 1/2-x,1/2+y,1/2-z
  7 1/2-x,1/2-y,-z
  8 1/2+x,1/2-y,1/2+z
loop_
_atom_site_label
_atom_site_fract_x
_atom_site_fract_y
_atom_site_fract_z
C1      0.21124  0.75111  0.60383      # 1
N'2     0.26962  0.63048  0.59631      # 2
H*3     0.24903  0.48595  0.55406      # 3
N4      0.12869  0.71490  0.56201      # 4
N'5     0.22603  0.96157  0.65944      # 5
N6      0.29914  1.01616  0.69795      # 6
N'7     0.36308  1.08410  0.73658      # 7
H*8     0.10995  0.54867  0.53312      # 8
H*9     0.09207  0.79850  0.58656      # 9
#XC1    0.19342  0.76866  0.60208      # 10
#XN'2   0.28127  0.65679  0.60383      # 11
#XH*3   0.25506  0.48596  0.55670      # 12
#XN4    0.13847  0.70149  0.57612      # 13
#XN'5   0.21519  0.96377  0.65807      # 14
#XN6    0.29620  1.00205  0.69304      # 15
#XN'7   0.35787  1.10470  0.74186      # 16
#XH*8   0.10912  0.55116  0.53483      # 17
#XH*9   0.08794  0.80374  0.58719      # 18
#XLP1+  0.21989  0.76452  0.62200      # 19
#XLP1-  0.20773  0.78269  0.59876      # 20
#XLP2+  0.25241  0.62100  0.59249      # 21
#XLP2-  0.27478  0.63871  0.60317      # 22
#XLP4+  0.12517  0.63230  0.58843      # 23
#XLP4-  0.11742  0.77040  0.52993      # 24
#XLP5+  0.21579  0.92453  0.67958      # 25
#XLP5-  0.21070  1.01818  0.63870      # 26
#XLP6+  0.29449  1.02489  0.69607      # 27
#XLP6-  0.29369  1.01969  0.70059      # 28
#XLP7+  0.37355  1.06353  0.76407      # 29
#XLP7-  0.37132  1.15280  0.72677      # 30
N1+     0.57124  0.45936 -0.12649      # 31

```

|        |         |         |          |      |
|--------|---------|---------|----------|------|
| N'2+   | 0.59331 | 0.28462 | -0.05490 | # 32 |
| O3+    | 0.54061 | 0.20508 | -0.03472 | # 33 |
| O4+    | 0.66522 | 0.23118 | -0.02659 | # 34 |
| N'5+   | 0.51206 | 0.65339 | -0.13370 | # 35 |
| O6+    | 0.45353 | 0.60030 | -0.11918 | # 36 |
| O7+    | 0.52891 | 0.84986 | -0.15880 | # 37 |
| H*8+   | 0.62332 | 0.54553 | -0.12273 | # 38 |
| #XN1+  | 0.55358 | 0.39685 | -0.15542 | # 39 |
| #XN'2+ | 0.59028 | 0.32760 | -0.08689 | # 40 |
| #XO3+  | 0.57485 | 0.20997 | -0.01830 | # 41 |
| #XO4+  | 0.65310 | 0.32974 | -0.04623 | # 42 |
| #XN'5+ | 0.53274 | 0.58876 | -0.14270 | # 43 |
| #XO6+  | 0.46892 | 0.69075 | -0.12104 | # 44 |
| #XO7+  | 0.55562 | 0.77222 | -0.14078 | # 45 |
| #XH*8+ | 0.62856 | 0.55652 | -0.12043 | # 46 |
| #XLP1+ | 0.54661 | 0.56462 | -0.09004 | # 47 |
| #XLP1- | 0.55645 | 0.45839 | -0.12109 | # 48 |
| #XLP2+ | 0.60511 | 0.26067 | -0.01396 | # 49 |
| #XLP2- | 0.56622 | 0.35029 | -0.10430 | # 50 |
| #XLP3+ | 0.52921 | 0.31156 | -0.08472 | # 51 |
| #XLP3- | 0.59873 | 0.04247 | -0.05702 | # 52 |
| #XLP4+ | 0.64074 | 0.22697 | -0.02344 | # 53 |
| #XLP4- | 0.64429 | 0.38945 | -0.07454 | # 54 |
| #XLP5+ | 0.49864 | 0.74389 | -0.11722 | # 55 |
| #XLP5- | 0.53106 | 0.50990 | -0.13841 | # 56 |
| #XLP6+ | 0.49287 | 0.47648 | -0.11997 | # 57 |
| #XLP6- | 0.44927 | 0.72085 | -0.20199 | # 58 |
| #XLP7+ | 0.51278 | 0.80773 | -0.14755 | # 59 |
| #XLP7- | 0.57639 | 0.69765 | -0.14040 | # 60 |
| #END   |         |         |          |      |

data\_N3F\_DNH\_5  
 \_chemical\_name\_systematic  
 ;RAS NH3 PVDZ

E(total)=-4.14079E+01 E(coul)=-2.29645E+01 E(vdW)=-1.84434E+01 Density= 1.69807

;  
 \_cell\_length\_a 9.330  
 \_cell\_length\_b 8.423  
 \_cell\_length\_c 5.446  
 \_cell\_angle\_alpha 88.02  
 \_cell\_angle\_beta 102.45  
 \_cell\_angle\_gamma 115.70  
 \_cell\_formula\_units\_Z 2  
 \_symmetry\_space\_group\_name\_H-M 'P -1 '  
 \_symmetry\_Int\_Tables\_number 2  
 loop\_  
 \_symmetry\_equiv\_pos\_as\_xyz  
 1 x,y,z  
 2 -x,-y,-z  
 loop\_  
 \_atom\_site\_label

| <u>_atom_site_fract_x</u> | <u>_atom_site_fract_y</u> | <u>_atom_site_fract_z</u> |              |
|---------------------------|---------------------------|---------------------------|--------------|
| C1                        | 0.58071                   | 0.29502                   | 0.56176 # 1  |
| N'2                       | 0.46145                   | 0.30447                   | 0.62977 # 2  |
| H*3                       | 0.50002                   | 0.38750                   | 0.78677 # 3  |
| N4                        | 0.74562                   | 0.38286                   | 0.66555 # 4  |
| N'5                       | 0.55502                   | 0.18680                   | 0.34580 # 5  |
| N6                        | 0.40960                   | 0.10659                   | 0.23197 # 6  |
| N'7                       | 0.28278                   | 0.02690                   | 0.11290 # 7  |
| H*8                       | 0.77919                   | 0.43809                   | 0.84254 # 8  |
| H*9                       | 0.81967                   | 0.33683                   | 0.61575 # 9  |
| #XC1                      | 0.61672                   | 0.29984                   | 0.55965 # 10 |
| #XN'2                     | 0.43875                   | 0.28933                   | 0.59451 # 11 |
| #XH*3                     | 0.48790                   | 0.38187                   | 0.78175 # 12 |
| #XN4                      | 0.72508                   | 0.35339                   | 0.67078 # 13 |
| #XN'5                     | 0.57669                   | 0.19014                   | 0.35278 # 14 |
| #XN6                      | 0.41523                   | 0.11633                   | 0.24806 # 15 |
| #XN'7                     | 0.29349                   | 0.01695                   | 0.09737 # 16 |
| #XH*8                     | 0.78082                   | 0.43472                   | 0.84086 # 17 |
| #XH*9                     | 0.82802                   | 0.33588                   | 0.61416 # 18 |
| #XLP1+                    | 0.56304                   | 0.25803                   | 0.54192 # 19 |
| #XLP1-                    | 0.58890                   | 0.30629                   | 0.53379 # 20 |
| #XLP2+                    | 0.49552                   | 0.31276                   | 0.65344 # 21 |
| #XLP2-                    | 0.45112                   | 0.29050                   | 0.61760 # 22 |
| #XLP4+                    | 0.74877                   | 0.32717                   | 0.74983 # 23 |
| #XLP4-                    | 0.77126                   | 0.45004                   | 0.62000 # 24 |
| #XLP5+                    | 0.57324                   | 0.14535                   | 0.39117 # 25 |
| #XLP5-                    | 0.58821                   | 0.23114                   | 0.30295 # 26 |
| #XLP6+                    | 0.41918                   | 0.11086                   | 0.22734 # 27 |
| #XLP6-                    | 0.42040                   | 0.10157                   | 0.23322 # 28 |
| #XLP7+                    | 0.25999                   | -0.03000                  | 0.12492 # 29 |
| #XLP7-                    | 0.26899                   | 0.04826                   | 0.03866 # 30 |
| N1+                       | 0.13936                   | 0.24057                   | 0.64575 # 31 |
| N'2+                      | 0.18371                   | 0.38690                   | 0.82637 # 32 |
| O3+                       | 0.08022                   | 0.43064                   | 0.84960 # 33 |
| O4+                       | 0.32488                   | 0.44202                   | 0.94374 # 34 |
| N'5+                      | 0.03215                   | 0.22908                   | 0.40201 # 35 |
| O6+                       | -0.08221                  | 0.26150                   | 0.39480 # 36 |
| O7+                       | 0.07061                   | 0.17723                   | 0.23178 # 37 |
| H*8+                      | 0.24510                   | 0.24637                   | 0.61231 # 38 |
| #XN1+                     | 0.09833                   | 0.18127                   | 0.69295 # 39 |
| #XN'2+                    | 0.17558                   | 0.32106                   | 0.78619 # 40 |
| #XO3+                     | 0.14921                   | 0.46310                   | 0.87578 # 41 |
| #XO4+                     | 0.30323                   | 0.40235                   | 0.83940 # 42 |
| #XN'5+                    | 0.06825                   | 0.20929                   | 0.48566 # 43 |
| #XO6+                     | -0.04838                  | 0.25733                   | 0.32252 # 44 |
| #XO7+                     | 0.12138                   | 0.21298                   | 0.33022 # 45 |
| #XH*8+                    | 0.25610                   | 0.25093                   | 0.60645 # 46 |
| #XLP1+                    | 0.10105                   | 0.31745                   | 0.51534 # 47 |
| #XLP1-                    | 0.11125                   | 0.25239                   | 0.63166 # 48 |
| #XLP2+                    | 0.21095                   | 0.47093                   | 0.85545 # 49 |

```

#XLP2-  0.12753  0.28621  0.74333      # 50
#XLP3+  0.05633  0.32819  0.74236      # 51
#XLP3-  0.18292  0.38128  1.06591      # 52
#XLP4+  0.27748  0.44960  0.92372      # 53
#XLP4-  0.28510  0.34445  0.77697      # 54
#XLP5+  0.01236  0.26412  0.29937      # 55
#XLP5-  0.06193  0.21790  0.55966      # 56
#XLP6+  -0.01145  0.25761  0.55258      # 57
#XLP6-  -0.09589  0.09094  0.28524      # 58
#XLP7+  0.03880  0.20104  0.25541      # 59
#XLP7-  0.15843  0.21255  0.42230      # 60
#END

```

**S20.** Optimized crystal structure coordinates for guanidine – dinitramic acid (cocrystal form).

data\_G\_DNH\_1

\_chemical\_name\_systematic

;RAS NH3 PVDZ

E(total)=-5.21122E+01 E(coul)=-3.12002E+01 E(vdW)=-2.09119E+01 Density= 1.82449

;

\_cell\_length\_a 6.463

\_cell\_length\_b 9.113

\_cell\_length\_c 10.790

\_cell\_angle\_alpha 90.00

\_cell\_angle\_beta 107.90

\_cell\_angle\_gamma 90.00

\_cell\_formula\_units\_Z 4

\_symmetry\_space\_group\_name\_H-M 'P 21/A '

\_symmetry\_Int\_Tables\_number 14

loop\_

\_symmetry\_equiv\_pos\_as\_xyz

1 x,y,z

2 1/2-x,1/2+y,-z

3 -x,-y,-z

4 1/2+x,1/2-y,z

loop\_

\_atom\_site\_label

\_atom\_site\_fract\_x

\_atom\_site\_fract\_y

\_atom\_site\_fract\_z

C1 0.45358 -0.14263 0.73538 # 1

N'2 0.53598 -0.24337 0.81932 # 2

H\*3 0.62495 -0.19958 0.90643 # 3

N4 0.34649 -0.17931 0.60608 # 4

H\*5 0.21019 -0.12035 0.56339 # 5

H\*6 0.32364 -0.28899 0.59372 # 6

N7 0.45487 0.00871 0.75732 # 7

H\*8 0.55497 0.04091 0.84499 # 8

H\*9 0.46847 0.07207 0.68298 # 9

#XC1 0.42563 -0.13414 0.71009 # 10

#XN'2 0.52677 -0.25666 0.81137 # 11

|        |          |          |         |      |
|--------|----------|----------|---------|------|
| #XH*3  | 0.62421  | -0.21682 | 0.90668 | # 12 |
| #XN4   | 0.32902  | -0.17383 | 0.60871 | # 13 |
| #XH*5  | 0.20405  | -0.12608 | 0.56120 | # 14 |
| #XH*6  | 0.32456  | -0.27968 | 0.59669 | # 15 |
| #XN7   | 0.46248  | 0.00134  | 0.75010 | # 16 |
| #XH*8  | 0.55339  | 0.04122  | 0.84441 | # 17 |
| #XH*9  | 0.46884  | 0.07279  | 0.68900 | # 18 |
| #XLP1+ | 0.42534  | -0.14241 | 0.74220 | # 19 |
| #XLP1- | 0.47726  | -0.14991 | 0.72180 | # 20 |
| #XLP2+ | 0.50901  | -0.25827 | 0.81420 | # 21 |
| #XLP2- | 0.55762  | -0.24159 | 0.81259 | # 22 |
| #XLP4+ | 0.24995  | -0.19112 | 0.61306 | # 23 |
| #XLP4- | 0.39908  | -0.16664 | 0.57639 | # 24 |
| #XLP7+ | 0.38329  | 0.02465  | 0.75517 | # 25 |
| #XLP7- | 0.53938  | 0.01339  | 0.75082 | # 26 |
| N1+    | -0.01959 | 0.04632  | 0.80107 | # 27 |
| N'2+   | 0.15774  | 0.10792  | 0.90667 | # 28 |
| O3+    | 0.20177  | 0.23571  | 0.90198 | # 29 |
| O4+    | 0.23397  | 0.01856  | 0.99268 | # 30 |
| N'5+   | -0.03976 | 0.08925  | 0.66774 | # 31 |
| O6+    | -0.00990 | 0.21570  | 0.64592 | # 32 |
| O7+    | -0.09737 | -0.01276 | 0.59184 | # 33 |
| H*8+   | -0.00398 | -0.06526 | 0.80633 | # 34 |
| #XN1+  | -0.09432 | 0.07384  | 0.80917 | # 35 |
| #XN'2+ | 0.07853  | 0.07840  | 0.88026 | # 36 |
| #XO3+  | 0.24590  | 0.18675  | 0.93024 | # 37 |
| #XO4+  | 0.18562  | -0.00203 | 0.93682 | # 38 |
| #XN'5+ | -0.06133 | 0.06518  | 0.71105 | # 39 |
| #XO6+  | -0.01159 | 0.16242  | 0.61875 | # 40 |
| #XO7+  | -0.05136 | -0.02442 | 0.65014 | # 41 |
| #XH*8+ | 0.00242  | -0.07578 | 0.80617 | # 42 |
| #XLP1+ | 0.07064  | 0.08534  | 0.74145 | # 43 |
| #XLP1- | -0.00753 | 0.07601  | 0.79043 | # 44 |
| #XLP2+ | 0.26036  | 0.12328  | 0.93338 | # 45 |
| #XLP2- | 0.03333  | 0.10130  | 0.84807 | # 46 |
| #XLP3+ | 0.07801  | 0.19010  | 0.83823 | # 47 |
| #XLP3- | 0.14887  | 0.16484  | 1.01592 | # 48 |
| #XLP4+ | 0.23947  | 0.06433  | 0.97525 | # 49 |
| #XLP4- | 0.11533  | -0.02361 | 0.89907 | # 50 |
| #XLP5+ | 0.00156  | 0.09883  | 0.62030 | # 51 |
| #XLP5- | -0.05215 | 0.09322  | 0.74467 | # 52 |
| #XLP6+ | -0.01032 | 0.18176  | 0.73138 | # 53 |
| #XLP6- | -0.21445 | 0.13051  | 0.57640 | # 54 |
| #XLP7+ | -0.07156 | 0.03494  | 0.59898 | # 55 |
| #XLP7- | -0.04973 | -0.03921 | 0.69939 | # 56 |
| #END   |          |          |         |      |

data\_G\_DNH\_2  
\_chemical\_name\_systematic  
;RAS NH3 PVDZ

E(total)=-5.20866E+01 E(coul)=-3.06090E+01 E(vdW)=-2.14776E+01 Density= 1.83943

```

;
_cell_length_a  9.089
_cell_length_b  6.726
_cell_length_c  6.535
_cell_angle_alpha  69.06
_cell_angle_beta  112.77
_cell_angle_gamma  73.53
_cell_formula_units_Z  2
_symmetry_space_group_name_H-M 'P -1 '
_symmetry_Int_Tables_number  2
loop_
_symmetry_equiv_pos_as_xyz
  1 x,y,z
  2 -x,-y,-z
loop_
_atom_site_label
_atom_site_fract_x
_atom_site_fract_y
_atom_site_fract_z
C1      0.59337  0.19638  0.33132      # 1
N'2     0.42091  0.26929  0.21057      # 2
H*3     0.36774  0.31618  0.02077      # 3
N4      0.68806  0.14970  0.58412      # 4
H*5     0.81444  0.00056  0.70677      # 5
H*6     0.61052  0.15398  0.66136      # 6
N7      0.70726  0.15248  0.23920      # 7
H*8     0.63999  0.21465  0.04595      # 8
H*9     0.80845  0.19485  0.29784      # 9
#XC1    0.62768  0.17560  0.37899      # 10
#XN'2   0.41818  0.26579  0.23252      # 11
#XH*3   0.35306  0.31899  0.02819      # 12
#XN4    0.69687  0.12664  0.59042      # 13
#XH*5   0.81315 -0.00416  0.71615      # 14
#XH*6   0.61611  0.15138  0.65306      # 15
#XN7    0.70337  0.16693  0.24626      # 16
#XH*8   0.64119  0.21305  0.04764      # 17
#XH*9   0.80476  0.19184  0.28962      # 18
#XLP1+  0.59842  0.15961  0.34186      # 19
#XLP1-  0.58852  0.23307  0.33545      # 20
#XLP2+  0.42087  0.24384  0.24173      # 21
#XLP2-  0.41975  0.29786  0.20359      # 22
#XLP4+  0.70590  0.03565  0.64614      # 23
#XLP4-  0.70165  0.22455  0.58062      # 24
#XLP7+  0.74670  0.06644  0.28415      # 25
#XLP7-  0.68706  0.25379  0.18777      # 26
N1+     0.17875  0.44281  0.34365      # 27
N'2+    0.26853  0.40490  0.60411      # 28
O3+     0.17787  0.51526  0.66041      # 29
O4+     0.42963  0.24975  0.74014      # 30
N'5+    0.04264  0.69013  0.12103      # 31
O6+    -0.06423  0.82095  0.14269      # 32
O7+     0.05065  0.72827 -0.07030      # 33

```

|        |          |         |          |      |
|--------|----------|---------|----------|------|
| H*8+   | 0.27866  | 0.37873 | 0.31163  | # 34 |
| #XN1+  | 0.13460  | 0.39699 | 0.34832  | # 35 |
| #XN'2+ | 0.24467  | 0.38405 | 0.52346  | # 36 |
| #XO3+  | 0.25371  | 0.46505 | 0.70242  | # 37 |
| #XO4+  | 0.38916  | 0.30565 | 0.61995  | # 38 |
| #XN'5+ | 0.08469  | 0.58604 | 0.18136  | # 39 |
| #XO6+  | -0.04079 | 0.83692 | 0.07262  | # 40 |
| #XO7+  | 0.11811  | 0.64789 | 0.04032  | # 41 |
| #XH*8+ | 0.28943  | 0.37697 | 0.30883  | # 42 |
| #XLP1+ | 0.13840  | 0.62796 | 0.27991  | # 43 |
| #XLP1- | 0.15163  | 0.48646 | 0.34045  | # 44 |
| #XLP2+ | 0.31270  | 0.43189 | 0.68601  | # 45 |
| #XLP2- | 0.18678  | 0.42539 | 0.46360  | # 46 |
| #XLP3+ | 0.12433  | 0.52266 | 0.49507  | # 47 |
| #XLP3- | 0.29604  | 0.23952 | 0.81712  | # 48 |
| #XLP4+ | 0.38227  | 0.31056 | 0.72973  | # 49 |
| #XLP4- | 0.35416  | 0.31507 | 0.52510  | # 50 |
| #XLP5+ | 0.01670  | 0.80564 | 0.05301  | # 51 |
| #XLP5- | 0.08901  | 0.54884 | 0.25453  | # 52 |
| #XLP6+ | 0.02331  | 0.65022 | 0.27903  | # 53 |
| #XLP6- | -0.11951 | 0.76423 | -0.07154 | # 54 |
| #XLP7+ | 0.02652  | 0.75975 | -0.03104 | # 55 |
| #XLP7- | 0.16537  | 0.55345 | 0.12137  | # 56 |
| #END   |          |         |          |      |

data\_G\_DNH\_3  
 \_chemical\_name\_systematic  
 ;RAS NH3 PVDZ

E(total)=-5.20782E+01 E(coul)=-3.10375E+01 E(vdW)=-2.10407E+01 Density= 1.82759

```

;
_cell_length_a 6.453
_cell_length_b 9.134
_cell_length_c 10.730
_cell_angle_alpha 90.00
_cell_angle_beta 107.30
_cell_angle_gamma 90.00
_cell_formula_units_Z 4
_symmetry_space_group_name_H-M 'P 21/A '
_symmetry_Int_Tables_number 14
loop_
_symmetry_equiv_pos_as_xyz
  1 x,y,z
  2 1/2-x,1/2+y,-z
  3 -x,-y,-z
  4 1/2+x,1/2-y,z
loop_
_atom_site_label
_atom_site_fract_x
_atom_site_fract_y
_atom_site_fract_z
C1 0.77569 0.14089 0.73395

```

# 1

|        |         |          |         |      |
|--------|---------|----------|---------|------|
| N'2    | 0.77844 | 0.24144  | 0.81815 | # 2  |
| H*3    | 0.78178 | 0.19776  | 0.90626 | # 3  |
| N4     | 0.74666 | 0.17717  | 0.60365 | # 4  |
| H*5    | 0.83933 | 0.11947  | 0.55956 | # 5  |
| H*6    | 0.75361 | 0.28671  | 0.59053 | # 6  |
| N7     | 0.80123 | -0.00983 | 0.75649 | # 7  |
| H*8    | 0.79378 | -0.04206 | 0.84525 | # 8  |
| H*9    | 0.71203 | -0.07411 | 0.68300 | # 9  |
| #XC1   | 0.77739 | 0.13244  | 0.70844 | # 10 |
| #XN'2  | 0.77897 | 0.25471  | 0.81005 | # 11 |
| #XH*3  | 0.78231 | 0.21497  | 0.90641 | # 12 |
| #XN4   | 0.76691 | 0.17195  | 0.60604 | # 13 |
| #XH*5  | 0.84300 | 0.12523  | 0.55726 | # 14 |
| #XH*6  | 0.75603 | 0.27745  | 0.59354 | # 15 |
| #XN7   | 0.78597 | -0.00265 | 0.74938 | # 16 |
| #XH*8  | 0.79476 | -0.04236 | 0.84465 | # 17 |
| #XH*9  | 0.71796 | -0.07477 | 0.68901 | # 18 |
| #XLP1+ | 0.81088 | 0.14110  | 0.74034 | # 19 |
| #XLP1- | 0.73783 | 0.14770  | 0.72074 | # 20 |
| #XLP2+ | 0.79954 | 0.25656  | 0.81261 | # 21 |
| #XLP2- | 0.74997 | 0.23932  | 0.81176 | # 22 |
| #XLP4+ | 0.84961 | 0.19020  | 0.60920 | # 23 |
| #XLP4- | 0.66380 | 0.16353  | 0.57490 | # 24 |
| #XLP7+ | 0.87061 | -0.02489 | 0.75343 | # 25 |
| #XLP7- | 0.71056 | -0.01559 | 0.75122 | # 26 |
| N1+    | 0.67927 | 0.04370  | 0.19843 | # 27 |
| N'2+   | 0.79021 | 0.08766  | 0.33227 | # 28 |
| O3+    | 0.83968 | 0.21424  | 0.35391 | # 29 |
| O4+    | 0.80913 | -0.01382 | 0.40865 | # 30 |
| N'5+   | 0.75207 | 0.10548  | 0.09338 | # 31 |
| O6+    | 0.79880 | 0.23334  | 0.09788 | # 32 |
| O7+    | 0.74514 | 0.01608  | 0.00787 | # 33 |
| H*8+   | 0.69168 | -0.06755 | 0.19378 | # 34 |
| #XN1+  | 0.59563 | 0.07053  | 0.18949 | # 35 |
| #XN'2+ | 0.72606 | 0.06306  | 0.28859 | # 36 |
| #XO3+  | 0.86579 | 0.16133  | 0.38149 | # 37 |
| #XO4+  | 0.79792 | -0.02567 | 0.35042 | # 38 |
| #XN'5+ | 0.69905 | 0.07568  | 0.11942 | # 39 |
| #XO6+  | 0.81606 | 0.18456  | 0.07005 | # 40 |
| #XO7+  | 0.75215 | -0.00429 | 0.06378 | # 41 |
| #XH*8+ | 0.69845 | -0.07799 | 0.19405 | # 42 |
| #XLP1+ | 0.81546 | 0.08990  | 0.17818 | # 43 |
| #XLP1- | 0.69940 | 0.07447  | 0.19639 | # 44 |
| #XLP2+ | 0.87856 | 0.09797  | 0.38034 | # 45 |
| #XLP2- | 0.70155 | 0.09079  | 0.25471 | # 46 |
| #XLP3+ | 0.75526 | 0.17956  | 0.26804 | # 47 |
| #XLP3- | 0.70422 | 0.12838  | 0.42252 | # 48 |
| #XLP4+ | 0.82722 | 0.03389  | 0.40147 | # 49 |
| #XLP4- | 0.75106 | -0.04088 | 0.30092 | # 50 |
| #XLP5+ | 0.82858 | 0.12132  | 0.06731 | # 51 |
| #XLP5- | 0.68504 | 0.09850  | 0.15131 | # 52 |
| #XLP6+ | 0.73821 | 0.18753  | 0.16120 | # 53 |



```

#XLP6- 0.63405 0.16116 -0.01694 # 54
#XLP7+ 0.76715 0.06195 0.02525 # 55
#XLP7- 0.71918 -0.02599 0.10127 # 56
#END

```

```

data_G_DNH_4
_chemical_name_systematic
;RAS NH3 PVDZ

```

```

E(total)=-5.17455E+01 E(coul)=-3.21921E+01 E(vdW)=-1.95534E+01 Density= 1.76977
;

```

```

_cell_length_a 7.289
_cell_length_b 12.653
_cell_length_c 13.670
_cell_angle_alpha 90.00
_cell_angle_beta 81.57
_cell_angle_gamma 90.00
_cell_formula_units_Z 8
_symmetry_space_group_name_H-M 'C 2/C '
_symmetry_Int_Tables_number 15

```

```

loop_
_symmetry_equiv_pos_as_xyz

```

```

1 x,y,z
2 -x,y,1/2-z
3 -x,-y,-z
4 x,-y,1/2+z
5 1/2+x,1/2+y,z
6 1/2-x,1/2+y,1/2-z
7 1/2-x,1/2-y,-z
8 1/2+x,1/2-y,1/2+z

```

```

loop_

```

```

_atom_site_label
_atom_site_fract_x
_atom_site_fract_y
_atom_site_fract_z
C1 0.47429 0.76953 0.53374 # 1
N'2 0.46523 0.78371 0.44152 # 2
H*3 0.53547 0.72616 0.39911 # 3
N4 0.40501 0.84578 0.60308 # 4
H*5 0.33684 0.81680 0.66745 # 5
H*6 0.33314 0.90286 0.57313 # 6
N7 0.54749 0.68205 0.57728 # 7
H*8 0.62061 0.63198 0.52865 # 8
H*9 0.61254 0.69868 0.63612 # 9
#XC1 0.46316 0.77541 0.55408 # 10
#XN'2 0.45312 0.79332 0.44218 # 11
#XH*3 0.52587 0.73435 0.39285 # 12
#XN4 0.39289 0.83816 0.60644 # 13
#XH*5 0.32950 0.81978 0.66745 # 14
#XH*6 0.33787 0.89666 0.57485 # 15
#XN7 0.55191 0.69151 0.57710 # 16
#XH*8 0.61965 0.63188 0.52931 # 17

```

|        |         |          |         |      |
|--------|---------|----------|---------|------|
| #XH*9  | 0.61150 | 0.69473  | 0.63325 | # 18 |
| #XLP1+ | 0.44949 | 0.75990  | 0.53473 | # 19 |
| #XLP1- | 0.49365 | 0.78587  | 0.53435 | # 20 |
| #XLP2+ | 0.43703 | 0.78901  | 0.44291 | # 21 |
| #XLP2- | 0.48567 | 0.79105  | 0.44224 | # 22 |
| #XLP4+ | 0.31838 | 0.82896  | 0.61023 | # 23 |
| #XLP4- | 0.46282 | 0.86761  | 0.61467 | # 24 |
| #XLP7+ | 0.49812 | 0.66189  | 0.59528 | # 25 |
| #XLP7- | 0.62050 | 0.69979  | 0.56916 | # 26 |
| N1+    | 0.66977 | -0.05740 | 0.16326 | # 27 |
| N'2+   | 0.75385 | -0.09423 | 0.24746 | # 28 |
| O3+    | 0.82299 | -0.03024 | 0.29604 | # 29 |
| O4+    | 0.73351 | -0.18907 | 0.26056 | # 30 |
| N'5+   | 0.76465 | 0.02442  | 0.09991 | # 31 |
| O6+    | 0.83456 | 0.09693  | 0.13790 | # 32 |
| O7+    | 0.75162 | 0.01000  | 0.01302 | # 33 |
| H*8+   | 0.65489 | -0.12153 | 0.11968 | # 34 |
| #XN1+  | 0.60536 | -0.03536 | 0.18225 | # 35 |
| #XN'2+ | 0.69984 | -0.08757 | 0.22176 | # 36 |
| #XO3+  | 0.82844 | -0.07461 | 0.29155 | # 37 |
| #XO4+  | 0.73064 | -0.16969 | 0.21941 | # 38 |
| #XN'5+ | 0.70749 | -0.00354 | 0.11727 | # 39 |
| #XO6+  | 0.84251 | 0.08008  | 0.09919 | # 40 |
| #XO7+  | 0.74360 | -0.02732 | 0.04237 | # 41 |
| #XH*8+ | 0.65822 | -0.12800 | 0.11500 | # 42 |
| #XLP1+ | 0.80167 | -0.02446 | 0.13970 | # 43 |
| #XLP1- | 0.69477 | -0.03878 | 0.16862 | # 44 |
| #XLP2+ | 0.82464 | -0.11195 | 0.26666 | # 45 |
| #XLP2- | 0.69085 | -0.05532 | 0.21307 | # 46 |
| #XLP3+ | 0.75607 | -0.01011 | 0.24229 | # 47 |
| #XLP3- | 0.67430 | -0.10838 | 0.33845 | # 48 |
| #XLP4+ | 0.76162 | -0.15806 | 0.26865 | # 49 |
| #XLP4- | 0.69476 | -0.15530 | 0.18974 | # 50 |
| #XLP5+ | 0.83879 | 0.04353  | 0.07331 | # 51 |
| #XLP5- | 0.69553 | -0.00397 | 0.14921 | # 52 |
| #XLP6+ | 0.76090 | 0.04296  | 0.17631 | # 53 |
| #XLP6- | 0.69417 | 0.10990  | 0.06701 | # 54 |
| #XLP7+ | 0.77862 | 0.02881  | 0.03628 | # 55 |
| #XLP7- | 0.70379 | -0.05613 | 0.06642 | # 56 |

#END

data\_G\_DNH\_5

\_chemical\_name\_systematic

;RAS NH3 PVDZ

E(total)=-5.17218E+01 E(coul)=-3.19394E+01 E(vdW)=-1.97824E+01 Density= 1.83337

;

\_cell\_length\_a 7.124

\_cell\_length\_b 6.852

\_cell\_length\_c 8.038

\_cell\_angle\_alpha 90.00

\_cell\_angle\_beta 50.08

```

_cell_angle_gamma 90.00
_cell_formula_units_Z 2
_symmetry_space_group_name_H-M 'P 21 '
_symmetry_Int_Tables_number 4
loop_
_symmetry_equiv_pos_as_xyz
  1 x,y,z
  2 -x,1/2+y,-z
loop_
_atom_site_label
_atom_site_fract_x
_atom_site_fract_y
_atom_site_fract_z
C1      -0.31573  0.72316  0.01938      # 1
N'2     -0.28795  0.90601  0.03341      # 2
H*3     -0.10741  0.94410 -0.06905      # 3
N4      -0.54633  0.63731  0.16303      # 4
H*5     -0.58527  0.53781  0.09569      # 5
H*6     -0.68046  0.73780  0.25472      # 6
N7      -0.13521  0.58965 -0.13105      # 7
H*8      0.03808  0.63997 -0.21860      # 8
H*9     -0.15612  0.45288 -0.07320      # 9
#XC1    -0.34736  0.69046  0.03090      # 10
#XN'2   -0.31423  0.91205  0.04959      # 11
#XH*3   -0.12486  0.96196 -0.05597      # 12
#XN4    -0.54364  0.63450  0.14508      # 13
#XH*5   -0.59586  0.54163  0.09975      # 14
#XH*6   -0.66711  0.73114  0.24375      # 15
#XN7    -0.14879  0.59010 -0.11099      # 16
#XH*8    0.03714  0.63912 -0.21896      # 17
#XH*9   -0.14797  0.45796 -0.08175      # 18
#XLP1+  -0.31703  0.72994 -0.00620      # 19
#XLP1-  -0.33135  0.71714  0.05720      # 20
#XLP2+  -0.31858  0.91669  0.03688      # 21
#XLP2-  -0.28680  0.89737  0.05350      # 22
#XLP4+  -0.58326  0.65754  0.10779      # 23
#XLP4-  -0.55119  0.59490  0.22325      # 24
#XLP7+  -0.14640  0.57234 -0.18188      # 25
#XLP7-  -0.10910  0.57736 -0.07763      # 26
N1+     0.37531  0.18041  0.34734      # 27
N'2+    0.16415  0.08187  0.53970      # 28
O3+     0.02739  0.17433  0.70447      # 29
O4+     0.14796 -0.08694  0.50230      # 30
N'5+    0.51202  0.31758  0.37241      # 31
O6+     0.40021  0.42695  0.52518      # 32
O7+     0.73156  0.30851  0.22163      # 33
H*8+    0.49492  0.07503  0.24089      # 34
#XN1+   0.33030  0.23120  0.32505      # 35
#XN'2+  0.23179  0.10989  0.45263      # 36
#XO3+   0.04491  0.09379  0.68475      # 37
#XO4+   0.24760 -0.04466  0.44460      # 38
#XN'5+  0.47814  0.27682  0.33416      # 39

```

|        |          |          |         |      |
|--------|----------|----------|---------|------|
| #XO6+  | 0.49843  | 0.40109  | 0.46664 | # 40 |
| #XO7+  | 0.66499  | 0.23817  | 0.24387 | # 41 |
| #XH*8+ | 0.50727  | 0.06338  | 0.23423 | # 42 |
| #XLP1+ | 0.41733  | 0.21482  | 0.44803 | # 43 |
| #XLP1- | 0.35692  | 0.20766  | 0.38645 | # 44 |
| #XLP2+ | 0.11293  | 0.03129  | 0.62805 | # 45 |
| #XLP2- | 0.24922  | 0.17146  | 0.44401 | # 46 |
| #XLP3+ | 0.16385  | 0.23403  | 0.56794 | # 47 |
| #XLP3- | -0.05308 | 0.05899  | 0.59859 | # 48 |
| #XLP4+ | 0.12060  | -0.03844 | 0.55349 | # 49 |
| #XLP4- | 0.32235  | -0.00602 | 0.37153 | # 50 |
| #XLP5+ | 0.56876  | 0.34016  | 0.40884 | # 51 |
| #XLP5- | 0.39977  | 0.27348  | 0.37160 | # 52 |
| #XLP6+ | 0.31942  | 0.33945  | 0.49312 | # 53 |
| #XLP6- | 0.58685  | 0.49260  | 0.29084 | # 54 |
| #XLP7+ | 0.66844  | 0.33277  | 0.29003 | # 55 |
| #XLP7- | 0.61308  | 0.19098  | 0.23171 | # 56 |
| #END   |          |          |         |      |

**S21.** Optimized crystal structure coordinates for nitroformamidine – dinitramic acid (cocrystal form).

```
data_NO2F_DNH_1
  _chemical_name_systematic
;RAS NH3 PVDZ
```

```
E(total)=-4.64049E+01 E(coul)=-2.41826E+01 E(vdW)=-2.22223E+01 Density= 1.94510
;
```

```
_cell_length_a  8.128
_cell_length_b 15.825
_cell_length_c  5.207
_cell_angle_alpha  90.00
_cell_angle_beta   89.53
_cell_angle_gamma  90.00
_cell_formula_units_Z  4
_symmetry_space_group_name_H-M 'P 21/A '
_symmetry_Int_Tables_number 14
```

```
loop_
  _symmetry_equiv_pos_as_xyz
  1 x,y,z
  2 1/2-x,1/2+y,-z
  3 -x,-y,-z
  4 1/2+x,1/2-y,z
```

```
loop_
  _atom_site_label
  _atom_site_fract_x
  _atom_site_fract_y
  _atom_site_fract_z
C1      0.20006  0.53827  0.05184      # 1
N#2     0.28412  0.54684 -0.15135      # 2
N3      0.09375  0.59384  0.15921      # 3
H*4     0.07641  0.64982  0.07102      # 4
```

|        |         |         |          |      |
|--------|---------|---------|----------|------|
| H*5    | 0.03373 | 0.57919 | 0.32350  | # 5  |
| N6     | 0.20995 | 0.45593 | 0.21573  | # 6  |
| O7     | 0.12474 | 0.45209 | 0.41078  | # 7  |
| O8     | 0.30245 | 0.40099 | 0.13714  | # 8  |
| H*9    | 0.35434 | 0.49463 | -0.18732 | # 9  |
| #XC1   | 0.17455 | 0.57207 | 0.03149  | # 10 |
| #XN'2  | 0.27533 | 0.56053 | -0.16296 | # 11 |
| #XN3   | 0.08014 | 0.59560 | 0.18501  | # 12 |
| #XH*4  | 0.06761 | 0.65707 | 0.07393  | # 13 |
| #XH*5  | 0.03552 | 0.59268 | 0.28919  | # 14 |
| #XN6   | 0.20875 | 0.43925 | 0.25593  | # 15 |
| #XO7   | 0.16392 | 0.43962 | 0.35315  | # 16 |
| #XO8   | 0.26677 | 0.41186 | 0.19071  | # 17 |
| #XH*9  | 0.36703 | 0.49974 | -0.22661 | # 18 |
| N1+    | 0.39842 | 0.68799 | -0.42398 | # 19 |
| N'2+   | 0.44775 | 0.74795 | -0.22658 | # 20 |
| O3+    | 0.54973 | 0.80038 | -0.27988 | # 21 |
| O4+    | 0.36901 | 0.73880 | -0.02824 | # 22 |
| N'5+   | 0.52492 | 0.65213 | -0.59143 | # 23 |
| O6+    | 0.63244 | 0.69769 | -0.67090 | # 24 |
| O7+    | 0.49847 | 0.57805 | -0.64035 | # 25 |
| H*8+   | 0.34046 | 0.63885 | -0.33368 | # 26 |
| #XN1+  | 0.36258 | 0.70915 | -0.49351 | # 27 |
| #XN'2+ | 0.40679 | 0.72907 | -0.29423 | # 28 |
| #XO3+  | 0.52418 | 0.78719 | -0.18680 | # 29 |
| #XO4+  | 0.37664 | 0.70925 | -0.10464 | # 30 |
| #XN'5+ | 0.46144 | 0.66122 | -0.55261 | # 31 |
| #XO6+  | 0.62479 | 0.66227 | -0.66247 | # 32 |
| #XO7+  | 0.46923 | 0.59428 | -0.54241 | # 33 |
| #XH*8+ | 0.33848 | 0.63359 | -0.32189 | # 34 |
| #XLP1+ | 0.52504 | 0.67381 | -0.43347 | # 35 |
| #XLP1- | 0.43139 | 0.69598 | -0.44376 | # 36 |
| #XLP2+ | 0.49439 | 0.75890 | -0.13090 | # 37 |
| #XLP2- | 0.42043 | 0.72894 | -0.37471 | # 38 |
| #XLP3+ | 0.50531 | 0.76157 | -0.40672 | # 39 |
| #XLP3- | 0.38079 | 0.82062 | -0.16976 | # 40 |
| #XLP4+ | 0.41295 | 0.75162 | -0.07002 | # 41 |
| #XLP4- | 0.35516 | 0.68850 | -0.18094 | # 42 |
| #XLP5+ | 0.59551 | 0.63335 | -0.60899 | # 43 |
| #XLP5- | 0.45383 | 0.68747 | -0.53262 | # 44 |
| #XLP6+ | 0.53982 | 0.71872 | -0.56989 | # 45 |
| #XLP6- | 0.52275 | 0.64436 | -0.84094 | # 46 |
| #XLP7+ | 0.53449 | 0.60073 | -0.64461 | # 47 |
| #XLP7- | 0.41965 | 0.60842 | -0.48586 | # 48 |
| #END   |         |         |          |      |

data\_NO2F\_DNH\_2  
\_chemical\_name\_systematic  
;RAS NH3 PVDZ

E(total)=-4.60276E+01 E(coul)=-2.47186E+01 E(vdW)=-2.13090E+01 Density= 1.91836  
;

```

_cell_length_a 15.125
_cell_length_b 8.782
_cell_length_c 5.267
_cell_angle_alpha 90.00
_cell_angle_beta 76.05
_cell_angle_gamma 90.00
_cell_formula_units_Z 4
_symmetry_space_group_name_H-M 'P 21/A '
_symmetry_Int_Tables_number 14
loop_
_symmetry_equiv_pos_as_xyz
  1 x,y,z
  2 1/2-x,1/2+y,-z
  3 -x,-y,-z
  4 1/2+x,1/2-y,z
loop_
_atom_site_label
_atom_site_fract_x
_atom_site_fract_y
_atom_site_fract_z
C1      0.54454 0.28642 0.01875 # 1
N'2     0.54805 0.20440 -0.18018 # 2
N3      0.60961 0.37940 0.06779 # 3
H*4     0.66931 0.38696 -0.06730 # 4
H*5     0.59817 0.43933 0.23584 # 5
N6      0.45773 0.29026 0.24957 # 6
O7      0.45925 0.37262 0.43643 # 7
O8      0.39423 0.21042 0.22697 # 8
H*9     0.48885 0.14550 -0.16528 # 9
#XC1    0.58157 0.30542 -0.03191 # 10
#XN'2   0.56294 0.21061 -0.20387 # 11
#XN3    0.61233 0.39216 0.09039 # 12
#XH*4   0.67747 0.39423 -0.07134 # 13
#XH*5   0.61218 0.43544 0.19102 # 14
#XN6    0.44036 0.29411 0.30290 # 15
#XO7    0.44366 0.33705 0.39391 # 16
#XO8    0.40792 0.24289 0.26717 # 17
#XH*9   0.49337 0.13249 -0.20697 # 18
N1+     0.30511 -0.08761 0.56846 # 19
N'2+    0.34847 0.01943 0.71201 # 20
O3+     0.30319 0.12029 0.83283 # 21
O4+     0.42761 -0.01416 0.69948 # 22
N'5+    0.24114 -0.02891 0.42510 # 23
O6+     0.18816 0.06849 0.52534 # 24
O7+     0.24754 -0.09526 0.21814 # 25
H*8+    0.35573 -0.14271 0.43707 # 26
#XN1+   0.28156 -0.12109 0.65157 # 27
#XN'2+  0.33652 -0.03682 0.67732 # 28
#XO3+   0.34103 0.11000 0.79585 # 29
#XO4+   0.40875 -0.03595 0.61439 # 30
#XN'5+  0.26051 -0.07106 0.47414 # 31
#XO6+   0.20109 0.04698 0.42180 # 32

```

```

#XO7+    0.27997 -0.09395  0.27014      # 33
#XH*8+   0.36127 -0.14463  0.42117      # 34
#XLP1+   0.28803  0.01110  0.47688      # 35
#XLP1-   0.29192 -0.05968  0.58097      # 36
#XLP2+   0.37097  0.08205  0.71848      # 37
#XLP2-   0.30793 -0.04049  0.67815      # 38
#XLP3+   0.27716  0.04062  0.74480      # 39
#XLP3-   0.35801  0.00756  0.95100      # 40
#XLP4+   0.40435  0.02118  0.72387      # 41
#XLP4-   0.39170 -0.07822  0.56713      # 42
#XLP5+   0.23033  0.01871  0.34253      # 43
#XLP5-   0.26147 -0.06141  0.55397      # 44
#XLP6+   0.22916  0.01900  0.61649      # 45
#XLP6-   0.16056 -0.08136  0.42321      # 46
#XLP7+   0.23532 -0.05494  0.27204      # 47
#XLP7-   0.30200 -0.11862  0.32735      # 48
#END

```

```

data_NO2F_DNH_3
  _chemical_name_systematic
;RAS NH3 PVDZ

```

E(total)=-4.58610E+01 E(coul)=-2.47612E+01 E(vdW)=-2.10998E+01 Density= 1.88379

;

```

  _cell_length_a  5.383
  _cell_length_b  6.259
  _cell_length_c 10.300
  _cell_angle_alpha  90.00
  _cell_angle_beta   85.03
  _cell_angle_gamma  90.00
  _cell_formula_units_Z  2
  _symmetry_space_group_name_H-M 'P 21 '
  _symmetry_Int_Tables_number  4
loop_
  _symmetry_equiv_pos_as_xyz
    1 x,y,z
    2 -x,1/2+y,-z
loop_
  _atom_site_label
  _atom_site_fract_x
  _atom_site_fract_y
  _atom_site_fract_z
C1      0.38508  0.43445  0.15366      # 1
N#2     0.56907  0.39978  0.21875      # 2
N3      0.30691  0.62305  0.10816      # 3
H*4     0.40332  0.75605  0.12676      # 4
H*5     0.15569  0.62920  0.05695      # 5
N6      0.21278  0.24870  0.11509      # 6
O7      0.03756  0.29441  0.05180      # 7
O8      0.26549  0.07025  0.15103      # 8
H*9     0.58463  0.24141  0.24020      # 9
#XC1    0.41395  0.52432  0.15409      # 10

```

|        |         |          |         |      |
|--------|---------|----------|---------|------|
| #XN'2  | 0.58377 | 0.43519  | 0.22003 | # 11 |
| #XN3   | 0.28445 | 0.63551  | 0.09937 | # 12 |
| #XH*4  | 0.40302 | 0.77745  | 0.12446 | # 13 |
| #XH*5  | 0.19057 | 0.65748  | 0.06572 | # 14 |
| #XN6   | 0.17164 | 0.21311  | 0.10498 | # 15 |
| #XO7   | 0.08502 | 0.24236  | 0.07301 | # 16 |
| #XO8   | 0.22115 | 0.11658  | 0.13144 | # 17 |
| #XH*9  | 0.62130 | 0.24450  | 0.25215 | # 18 |
| N1+    | 0.16753 | 0.20526  | 0.64968 | # 19 |
| N'2+   | 0.23400 | 0.40952  | 0.70514 | # 20 |
| O3+    | 0.20591 | 0.56990  | 0.64363 | # 21 |
| O4+    | 0.30094 | 0.38952  | 0.81456 | # 22 |
| N'5+   | 0.23231 | 0.16783  | 0.51120 | # 23 |
| O6+    | 0.20410 | 0.31088  | 0.43579 | # 24 |
| O7+    | 0.29811 | -0.01595 | 0.48920 | # 25 |
| H*8+   | 0.25074 | 0.08803  | 0.69965 | # 26 |
| #XN1+  | 0.06072 | 0.21066  | 0.65228 | # 27 |
| #XN'2+ | 0.18781 | 0.32813  | 0.70025 | # 28 |
| #XO3+  | 0.26135 | 0.54890  | 0.68606 | # 29 |
| #XO4+  | 0.30839 | 0.31370  | 0.77618 | # 30 |
| #XN'5+ | 0.18661 | 0.15697  | 0.56291 | # 31 |
| #XO6+  | 0.25915 | 0.23381  | 0.43322 | # 32 |
| #XO7+  | 0.30636 | 0.02371  | 0.54348 | # 33 |
| #XH*8+ | 0.26457 | 0.07861  | 0.70332 | # 34 |
| #XLP1+ | 0.29355 | 0.25166  | 0.57067 | # 35 |
| #XLP1- | 0.17121 | 0.23770  | 0.62646 | # 36 |
| #XLP2+ | 0.31471 | 0.48458  | 0.71412 | # 37 |
| #XLP2- | 0.15099 | 0.31683  | 0.66518 | # 38 |
| #XLP3+ | 0.15267 | 0.43020  | 0.61514 | # 39 |
| #XLP3- | 0.09472 | 0.53438  | 0.78246 | # 40 |
| #XLP4+ | 0.29304 | 0.43356  | 0.77899 | # 41 |
| #XLP4- | 0.27674 | 0.23836  | 0.75678 | # 42 |
| #XLP5+ | 0.31249 | 0.16788  | 0.45999 | # 43 |
| #XLP5- | 0.15026 | 0.21222  | 0.58125 | # 44 |
| #XLP6+ | 0.15191 | 0.32211  | 0.52841 | # 45 |
| #XLP6- | 0.09161 | 0.08977  | 0.42570 | # 46 |
| #XLP7+ | 0.29037 | 0.05295  | 0.47356 | # 47 |
| #XLP7- | 0.27533 | 0.03637  | 0.59470 | # 48 |
| #END   |         |          |         |      |

```

data_NO2F_DNH_4
  _chemical_name_systematic
;RAS NH3 PVDZ

```

```

E(total)=-4.57540E+01 E(coul)=-2.36103E+01 E(vdW)=-2.21438E+01 Density= 1.94659
;
_cell_length_a 6.154
_cell_length_b 7.834
_cell_length_c 14.812
_cell_angle_alpha 90.00
_cell_angle_beta 110.43
_cell_angle_gamma 90.00

```



```

_cell_formula_units_Z 4
_symmetry_space_group_name_H-M 'P 21/C '
_symmetry_Int_Tables_number 14
loop_
_symmetry_equiv_pos_as_xyz
  1 x,y,z
  2 -x,1/2+y,1/2-z
  3 -x,-y,-z
  4 x,1/2-y,1/2+z
loop_
_atom_site_label
_atom_site_fract_x
_atom_site_fract_y
_atom_site_fract_z
C1      0.60741  0.44260 -0.35116      # 1
N'2     0.77202  0.47443 -0.38085      # 2
N3      0.56318  0.51503 -0.27663      # 3
H*4     0.67179  0.60644 -0.23836      # 4
H*5     0.42459  0.47782 -0.26019      # 5
N6      0.42100  0.30492 -0.40106      # 6
O7      0.26611  0.28088 -0.36827      # 7
O8      0.44324  0.23073 -0.46958      # 8
H*9     0.76295  0.40028 -0.43871      # 9
#XC1    0.64733  0.49471 -0.32188      # 10
#XN'2   0.79081  0.49585 -0.36963      # 11
#XN3    0.54430  0.51521 -0.27008      # 12
#XH*4   0.67468  0.61694 -0.23071      # 13
#XH*5   0.46095  0.50109 -0.25341      # 14
#XN6    0.37778  0.27638 -0.40986      # 15
#XO7    0.30220  0.26778 -0.39128      # 16
#XO8    0.40918  0.24183 -0.44890      # 17
#XH*9   0.79723  0.41157 -0.44107      # 18
N1+    -0.02593  0.27853  0.84685      # 19
N'2+   -0.13079  0.29169  0.92091      # 20
O3+    -0.20237  0.42835  0.93506      # 21
O4+    -0.14220  0.15357  0.95690      # 22
N'5+   0.12766  0.41482  0.83895      # 23
O6+    0.07462  0.56031  0.84722      # 24
O7+    0.29139  0.36015  0.81940      # 25
H*8+   0.06664  0.16737  0.85858      # 26
#XN1+  -0.10464  0.28725  0.81214      # 27
#XN'2+ -0.11354  0.26868  0.88746      # 28
#XO3+  -0.17885  0.36685  0.95626      # 29
#XO4+  -0.06978  0.16602  0.93748      # 30
#XN'5+ 0.06949  0.35588  0.82942      # 31
#XO6+  0.15810  0.52738  0.84941      # 32
#XO7+  0.24033  0.31376  0.83914      # 33
#XH*8+ 0.07924  0.15820  0.86190      # 34
#XLP1+ 0.08497  0.37556  0.88672      # 35
#XLP1- -0.02712  0.31756  0.85117      # 36
#XLP2+ -0.12313  0.30445  0.96541      # 37
#XLP2- -0.11047  0.30720  0.86701      # 38

```

```

#XLP3+  -0.14201  0.40933  0.88327      # 39
#XLP3-  -0.34696  0.26650  0.91203      # 40
#XLP4+  -0.15019  0.21231  0.95774      # 41
#XLP4-  -0.03672  0.16059  0.90791      # 42
#XLP5+   0.21554  0.46580  0.85802      # 43
#XLP5-   0.00139  0.36049  0.83154      # 44
#XLP6+  -0.02642  0.46439  0.84662      # 45
#XLP6-   0.12848  0.49302  0.76126      # 46
#XLP7+   0.25684  0.40623  0.82867      # 47
#XLP7-   0.17928  0.26350  0.83941      # 48
#END

```

```

data_NO2F_DNH_5
  _chemical_name_systematic
;RAS NH3 PVDZ

```

E(total)=-4.56738E+01 E(coul)=-2.44896E+01 E(vdW)=-2.11843E+01 Density= 1.87976

```

;
  _cell_length_a  20.242
  _cell_length_b   5.469
  _cell_length_c   6.260
  _cell_angle_alpha  90.00
  _cell_angle_beta   90.00
  _cell_angle_gamma  90.00
  _cell_formula_units_Z  4
  _symmetry_space_group_name_H-M 'P 212121'
  _symmetry_Int_Tables_number  19
loop_
  _symmetry_equiv_pos_as_xyz
    1 x,y,z
    2 1/2+x,1/2-y,-z
    3 -x,1/2+y,1/2-z
    4 1/2-x,-y,1/2+z
loop_
  _atom_site_label
  _atom_site_fract_x
  _atom_site_fract_y
  _atom_site_fract_z
C1      0.67065  0.09944  0.24708      # 1
N'2     0.63793 -0.09317  0.28067      # 2
N3      0.69246  0.18815  0.05845      # 3
H*4     0.68219  0.09320 -0.07554      # 4
H*5     0.71834  0.34557  0.05324      # 5
N6      0.69137  0.27120  0.43445      # 6
O7      0.72311  0.45513  0.38972      # 7
O8      0.67433  0.20936  0.61307      # 8
H*9     0.62809 -0.11559  0.43940      # 9
#XC1    0.66985  0.07299  0.15677      # 10
#XN'2   0.63705 -0.10705  0.24507      # 11
#XN3    0.69683  0.21199  0.04609      # 12
#XH*4   0.68321  0.09435 -0.09700      # 13
#XH*5   0.71372  0.31043  0.02466      # 14

```

|        |          |          |         |      |
|--------|----------|----------|---------|------|
| #XN6   | 0.69671  | 0.31255  | 0.47039 | # 15 |
| #XO7   | 0.71271  | 0.40374  | 0.44162 | # 16 |
| #XO8   | 0.68394  | 0.25728  | 0.56688 | # 17 |
| #XH*9  | 0.62202  | -0.15359 | 0.43606 | # 18 |
| N1+    | -0.07217 | 0.37367  | 0.47338 | # 19 |
| N'2+   | -0.00192 | 0.32337  | 0.49942 | # 20 |
| O3+    | 0.03472  | 0.36630  | 0.35270 | # 21 |
| O4+    | 0.01111  | 0.25221  | 0.67911 | # 22 |
| N'5+   | -0.10352 | 0.31214  | 0.27077 | # 23 |
| O6+    | -0.07417 | 0.35426  | 0.10765 | # 24 |
| O7+    | -0.15934 | 0.23336  | 0.29550 | # 25 |
| H*8+   | -0.09668 | 0.28073  | 0.59073 | # 26 |
| #XN1+  | -0.07271 | 0.47864  | 0.47193 | # 27 |
| #XN'2+ | -0.02766 | 0.36209  | 0.51524 | # 28 |
| #XO3+  | 0.03658  | 0.30873  | 0.42753 | # 29 |
| #XO4+  | -0.01702 | 0.24006  | 0.64277 | # 30 |
| #XN'5+ | -0.09961 | 0.35414  | 0.35332 | # 31 |
| #XO6+  | -0.09587 | 0.29408  | 0.12943 | # 32 |
| #XO7+  | -0.13893 | 0.22658  | 0.36842 | # 33 |
| #XH*8+ | -0.09853 | 0.26627  | 0.59988 | # 34 |
| #XLP1+ | -0.06808 | 0.25690  | 0.34007 | # 35 |
| #XLP1- | -0.06625 | 0.37358  | 0.42719 | # 36 |
| #XLP2+ | 0.02342  | 0.25017  | 0.49320 | # 37 |
| #XLP2- | -0.03739 | 0.39849  | 0.46257 | # 38 |
| #XLP3+ | -0.01202 | 0.40798  | 0.34938 | # 39 |
| #XLP3- | 0.04363  | 0.46728  | 0.57672 | # 40 |
| #XLP4+ | 0.01821  | 0.26486  | 0.60959 | # 41 |
| #XLP4- | -0.04293 | 0.26556  | 0.63457 | # 42 |
| #XLP5+ | -0.10971 | 0.23545  | 0.19358 | # 43 |
| #XLP5- | -0.08136 | 0.39362  | 0.36361 | # 44 |
| #XLP6+ | -0.05746 | 0.40296  | 0.24712 | # 45 |
| #XLP6- | -0.14327 | 0.44661  | 0.15609 | # 46 |
| #XLP7+ | -0.14179 | 0.24717  | 0.24950 | # 47 |
| #XLP7- | -0.12784 | 0.25617  | 0.44348 | # 48 |
| #END   |          |          |         |      |
